# Supplementary material for: FibroAtlas: A Database for the Exploration of Fibrotic Diseases and Their Genes
Source: Cardiol Res Pract. 2019 Dec 30;2019:4237285. doi: 10.1155/2019/4237285 (PMC7012261; doi:10.1155/2019/4237285)
Supplement: Supplementary Materials — Supplementary data are available at Cardiology Research and Practice Online. [file 4237285.f1.xlsx]

## Sheet: Table S1副本
Candidate fibrosis-related genes’ entrez gene symbol	PubMed ID of potential supporting literature.	Potential evidence	Year of publication
["2',3'-cyclic nucleotide 3' phosphodiesterase(CNP)\r\n"]	25483737_3	CNP exhibits many vasoprotective effects against pulmonary hypertension and pulmonary fibrosis.	2014
["2',3'-cyclic nucleotide 3' phosphodiesterase(CNP)\r\n"]	25437644_1	Exogenous C-type natriuretic peptide infusion ameliorates unilateral ureteral obstruction-induced tubulointerstitial fibrosis in rats.	2014
["2',3'-cyclic nucleotide 3' phosphodiesterase(CNP)\r\n"]	25437644_3	In this study, we established a rat model of unilateral ureteral obstruction (UUO) to observe the beneficial effects of CNP on tubulointerstitial fibrosis (TIF).	2014
["2',3'-cyclic nucleotide 3' phosphodiesterase(CNP)\r\n"]	25512164_6	CNP is a hormone, synthesized in the kidney, and is an important regulator of cell proliferation and organ fibrosis.	2014
["2',3'-cyclic nucleotide 3' phosphodiesterase(CNP)\r\n"]	25117468_11	We conclude that the failing LV is characterized by increased fibrosis and reduced CNP gene expression.	2014
["2',3'-cyclic nucleotide 3' phosphodiesterase(CNP)\r\n"]	24119135_4	We also examined whether CnP attenuates hepatic fibrosis in vivo.	2013
["2',3'-cyclic nucleotide 3' phosphodiesterase(CNP)\r\n"]	24119135_6	We also examined the effect of CnP on hepatic fibrosis induced by thioacetamide (TAA).	2013
["2',3'-cyclic nucleotide 3' phosphodiesterase(CNP)\r\n"]	24119135_14	When CnP was administered together with TAA, the surface of the liver was smooth and liver fibrosis was markedly inhibited.	2013
["2',3'-cyclic nucleotide 3' phosphodiesterase(CNP)\r\n"]	24119135_17	CnP also attenuates formation of the liver fibrosis induced by TAA in vivo.	2013
["2',3'-cyclic nucleotide 3' phosphodiesterase(CNP)\r\n"]	23561919_9	Increased fibrosis, metalloproteases and capillary density were localized to the infarct border zone (BZ), and were associated with increased expression of CNP (p=0.03 vs. remote zone (RZ)), VEGF-A (p<0.001 vs. RZ), BNP, a marker of myocardial dysfunction (p<0.01 vs. RZ) and the endothelial marker, factor VIII-related antigen (p<0.01 vs. RZ).	2013
["2',3'-cyclic nucleotide 3' phosphodiesterase(CNP)\r\n"]	24259420_3	CNP binds to natriuretic receptors in the basolateral membrane, elevates cellular cGMP, and opens cystic fibrosis transmembrane conductance regulator (CFTR) chloride channels in the apical membrane.	2013
["2',3'-cyclic nucleotide 3' phosphodiesterase(CNP)\r\n"]	22848833_13	Our data indicate that treatment with CNP attenuated Ang II-induced cardiac hypertrophy, fibrosis, and contractile dysfunction which were accompanied by reduced cardiac superoxide production.	2012
["2',3'-cyclic nucleotide 3' phosphodiesterase(CNP)\r\n"]	23152112_10	In experimental early stage HF characterized with marked atrial fibrosis, ANP, BNP, and CNP mRNA, and protein concentrations were higher in HF LA but not HF LV compared with normals.	2012
["2',3'-cyclic nucleotide 3' phosphodiesterase(CNP)\r\n"]	22743139_1	Increased urinary C-type natriuretic peptide excretion may be an early marker of renal tubulointerstitial fibrosis.	2012
["2',3'-cyclic nucleotide 3' phosphodiesterase(CNP)\r\n"]	22848833_10	CNP reduced Ang II-induced increases in cardiomyocyte size and interstitial fibrosis and suppressed hypertrophic- and fibrosis-related gene expression.	2012
["2',3'-cyclic nucleotide 3' phosphodiesterase(CNP)\r\n"]	21865266_10	Our findings provide evidence that urinary CNP and its ratio to plasma CNP may represent a novel biomarker for early age-mediated renal structural alterations, particularly fibrosis.	2011
["2',3'-cyclic nucleotide 3' phosphodiesterase(CNP)\r\n"]	22066359_6	METHODS AND RESULTS: With the study population of 108 patients, we characterized expression of CNP and NPR-B in human aortic valves and compared normal control valves (n = 12) with valves obtained from patients with aortic regurgitation (AR, n = 16), AR with fibrosis (AR+fibr., n = 19) and AS (n = 61).	2011
["2',3'-cyclic nucleotide 3' phosphodiesterase(CNP)\r\n"]	21865266_1	Urinary C-type natriuretic peptide excretion: a potential novel biomarker for renal fibrosis during aging.	2011
["2',3'-cyclic nucleotide 3' phosphodiesterase(CNP)\r\n"]	22202163_13	These results indicate that CnP exerts antifibrotic actions both in vitro and in vivo and improves islet fibrosis in Goto-Kakizaki rats.	2011
["2',3'-cyclic nucleotide 3' phosphodiesterase(CNP)\r\n"]	22202163_11	When CnP was administered orally for 4 wk, starting from 6 wk of age, invasion of stellate cells and macrophages was markedly reduced and islet fibrosis was significantly improved.	2011
["2',3'-cyclic nucleotide 3' phosphodiesterase(CNP)\r\n"]	21189408_1	The aging heart, myocardial fibrosis, and its relationship to circulating C-type natriuretic Peptide.	2010
["2',3'-cyclic nucleotide 3' phosphodiesterase(CNP)\r\n"]	21189408_3	Studies have established the potent antifibrotic and antiproliferative properties of C-type natriuretic peptide (CNP); however, the relationship between circulating CNP, LV fibrosis, and associated changes in LV function with natural aging are undefined.	2010
["2',3'-cyclic nucleotide 3' phosphodiesterase(CNP)\r\n"]	21189408_4	Accordingly, we characterized the relationship of plasma CNP with LV fibrosis and function in 2-, 11-, and 20-month-old male Fischer rats.	2010
["2',3'-cyclic nucleotide 3' phosphodiesterase(CNP)\r\n"]	21189408_6	Here we establish for the first time that a progressive decline in circulating CNP characterizes natural aging and is strongly associated with a reciprocal increase in LV fibrosis that precedes impairment of diastolic and systolic function.	2010
["2',3'-cyclic nucleotide 3' phosphodiesterase(CNP)\r\n"]	20605344_14	CONCLUSION: Radiation-induced fibrosis may play an important role in radiation-induced CNP.	2010
["2',3'-cyclic nucleotide 3' phosphodiesterase(CNP)\r\n"]	20605344_13	Multivariate analyses revealed that CNP at diagnosis, chemotherapy, total radiation dose to the nasopharynx, and upper neck fibrosis were independent risk factors for developing radiation-induced CNP.	2010
["2',3'-cyclic nucleotide 3' phosphodiesterase(CNP)\r\n"]	21189403_1	C-type natriuretic peptide and cardiac fibrosis.	2010
["2',3'-cyclic nucleotide 3' phosphodiesterase(CNP)\r\n"]	20802130_2	C-type natriuretic peptide (CNP) possesses nitric oxide-like signaling mechanisms and actions in the vasculature, including the inhibition of fibrosis and vascular remodeling through counterregulation of transforming growth factor-\xce\xb2 (TGF-\xce\xb2) signaling.	2010
["2',3'-cyclic nucleotide 3' phosphodiesterase(CNP)\r\n"]	15285999_1	C-type natriuretic peptide attenuates bleomycin-induced pulmonary fibrosis in mice.	2004
["2',3'-cyclic nucleotide 3' phosphodiesterase(CNP)\r\n"]	15285999_9	CNP infusion significantly attenuated BLM-induced pulmonary fibrosis, as indicated by significant decreases in Ashcroft score and lung hydroxyproline content.	2004
["2',3'-cyclic nucleotide 3' phosphodiesterase(CNP)\r\n"]	15285999_12	These results suggest that continuous infusion of CNP attenuates BLM-induced pulmonary fibrosis and improves survival in BLM mice, at least in part by inhibition of pulmonary inflammation and cell proliferation.	2004
["2',3'-cyclic nucleotide 3' phosphodiesterase(CNP)\r\n"]	15285999_10	CNP markedly decreased the number of Ki-67-positive cells in fibrotic lesions of the lung, suggesting antiproliferative effects of CNP on pulmonary fibrosis.	2004
["2',3'-cyclic nucleotide 3' phosphodiesterase(CNP)\r\n"]	15285999_4	Accordingly, we investigated whether CNP infusion attenuates bleomycin (BLM)-induced pulmonary fibrosis in mice.	2004
["2',3'-cyclic nucleotide 3' phosphodiesterase(CNP)\r\n"]	12746286_12	CNP produced by cardiac fibroblasts may play a role as an autocrine regulator against excessive cardiac fibrosis.	2003
["2',3'-cyclic nucleotide 3' phosphodiesterase(CNP)\r\n"]	12475749_3	CNP inhibits fibroblast activation in vitro and fibrosis in vivo, but endogenous CNP gene (Nppc) expression during tissue fibrosis has not been reported.	2002
["2',3'-cyclic nucleotide 3' phosphodiesterase(CNP)\r\n"]	9950772_2	In the shark, C-type natriuretic peptide (CNP) is the only cardiac natriuretic hormone identified and is a potent activator of Cl- secretion in the rectal gland, an epithelial organ of this species that contains cystic fibrosis transmembrane conductance regulator (CFTR) Cl- channels.	1999
["2',3'-cyclic nucleotide 3' phosphodiesterase(CNP)\r\n"]	9609738_2	We have previously shown that C-type natriuretic peptide (CNP), a guanylate cyclase agonist, can stimulate cystic fibrosis transmembrane conductance regulator (CFTR)-mediated chloride secretion in murine airway epithelial cells via protein kinase (PK) A activation through the inhibition of cGMP-inhibited phosphodiesterases.	1998
["2',3'-cyclic nucleotide 3' phosphodiesterase(CNP)\r\n"]	9115758_1	C-type natriuretic peptide increases chloride permeability in normal and cystic fibrosis airway cells.	1997
["2',3'-cyclic nucleotide 3' phosphodiesterase(CNP)\r\n"]	9115758_2	C-type natriuretic peptide (CNP), a hormone which stimulates particulate guanylate cyclase activity, was studied for its ability to stimulate chloride permeability through the cystic fibrosis transmembrane conductance regulator (CFTR) in airway epithelial cells.	1997
["2'-5'-oligoadenylate synthetase 1(OAS1)\r\n"]	26505957_2	The aim of this study was to assess the impact of genetic variants of oligoadenylate synthetase 1 (OAS1) single-nucleotide polymorphism (SNP) rs10774671 at the exon 7 splice acceptor site on liver fibrosis progression and hepatitis C virus (HCV) outcome in Egyptian HCV genotype 4 patients.	2015
["2'-5'-oligoadenylate synthetase 1(OAS1)\r\n"]	26505957_10	The polymorphism at OAS1 exon 7 rs3741981 might be a potential genetic marker and can be useful in the assessment of liver fibrosis progression and disease outcome in HCV-infected patients.	2015
["2'-5'-oligoadenylate synthetase 1(OAS1)\r\n"]	26505957_1	Impact of OAS1 Exon 7 rs10774671 Genetic Variation on Liver Fibrosis Progression in Egyptian HCV Genotype 4 Patients.	2015
["2'-5'-oligoadenylate synthetase 1(OAS1)\r\n"]	19515215_8	RESULTS: Patients with genotypes A/A, A/G and G/G of an SNP of OAS-1 at the exon 3 of its coding sequence were at gradient increased risks of suffering from higher serum alanine aminotransferase (P<0.001) and aspartate aminotransferase (P=0.001), higher degree of liver fibrosis (P=0.010) and higher presence of liver cirrhosis (P=0.001).	2009
["2'-5'-oligoadenylate synthetase 1(OAS1)\r\n"]	19515215_1	Polymorphism of OAS-1 determines liver fibrosis progression in hepatitis C by reduced ability to inhibit viral replication.	2009
["2'-5'-oligoadenylate synthetase 2(OAS2)\r\n"]	21789480_11	On multivariate analysis, hepatitis C etiology, recipient age, and OAS2 overexpression were independent predictors of early fibrosis progression.	2011
["5'-aminolevulinate synthase 2(ALAS2)\r\n"]	19996010_2	Chronic kidney disease (CKD) and ESRD, treated with conventional hemo- or peritoneal dialysis are both associated with a high prevalence of an increase in left ventricular mass (left ventricular hypertrophy [LVH]), intermyocardial cell fibrosis, and capillary loss.	2010
["5'-aminolevulinate synthase 2(ALAS2)\r\n"]	17075977_11	CONCLUSION: Continuous administrations of V-PYRRO/NO in BDL rats improved liver fibrosis and splanchnic hemodynamics without any noxious systemic hemo-dynamic effects.	2006
["5'-nucleotidase, cytosolic IA(NT5C1A)\r\n"]	25808994_9	In conclusion, early CNI withdrawal with everolimus initiation does not prevent interstitial fibrosis.	2015
["5'-nucleotidase, cytosolic IA(NT5C1A)\r\n"]	25808994_7	Fibrosis progression occurred in 46.2% (12/26) CNI-free EMT+ patients versus 51.6% (16/31) CNI EMT+ patients (p\xe2\x80\x89=\xe2\x80\x890.68).	2015
["5'-nucleotidase, cytosolic IA(NT5C1A)\r\n"]	25988397_10	Improvement in renal function was noted even in patients with chronic allograft fibrosis without evidence of acute CNI toxicity.	2015
["5'-nucleotidase, cytosolic IA(NT5C1A)\r\n"]	26258149_3	It has become evident that a combination of sustained alloreactivity and calcineurin-inhibitor- (CNI-) related nephrotoxicity results in fibrosis and consequently dysfunction of the graft.	2015
["5'-nucleotidase, cytosolic IA(NT5C1A)\r\n"]	26256288_11	Carefully selected patients can tolerate minimization to once daily CNI monotherapy as few have progression of fibrosis.	2015
["5'-nucleotidase, cytosolic IA(NT5C1A)\r\n"]	25630217_7	In the group analysis, despite of a higher incidence of C4d positivity (P = 0.05), progression of fibrosis, TGF-\xce\xb21 expression, and allograft function decline were significantly lower after conversion to mTORi compared with maintenance on CNI (P = 0.05, P = 0.02 and P = 0.01, respectively).	2015
["5'-nucleotidase, cytosolic IA(NT5C1A)\r\n"]	25630217_4	Using two distinct approaches, we evaluated the evolution of fibrosis and related markers in 36 stable kidney transplant patients under calcineurin inhibitor therapy with two indication biopsies each, prior and at least 6 months after substitution by mTORi (N = 18), or maintenance on CNI (N = 18).	2015
["5'-nucleotidase, cytosolic IA(NT5C1A)\r\n"]	25630217_1	Evolution of allograft fibrosis and function in kidney transplant recipients: a retrospective analysis of stable patients under CNI and mTORi.	2015
["5'-nucleotidase, cytosolic IA(NT5C1A)\r\n"]	24515306_13	CONCLUSION: Conversion from CNI to everolimus resulted in significant decreases of serum TGF-\xce\xb2 and urinary NGAL which may represent less fibrosis and tubular damage.	2014
["5'-nucleotidase, cytosolic IA(NT5C1A)\r\n"]	24433558_3	Recent studies have reported that up-regulation of transforming growth factor-\xce\xb21 (TGF-\xce\xb21) and activation of the Smad signaling pathway play important roles in cavernous fibrosis and in the deterioration of erectile function in a mouse model of cavernous nerve injury (CNI) and in patients with spinal cord injury.	2014
["5'-nucleotidase, cytosolic IA(NT5C1A)\r\n"]	25404086_14	On the other hand, the removal of CNI with increase in the dose of sirolimus limited the enhancement of the chronicity index at 12\xe2\x80\x89m (SRL, 2.18 vs\xe2\x80\x85TAC, 3.12, P\xe2\x80\x89=\xe2\x80\x890.0007), diminished the deposition of fibrosis and promoted the stabilization of TGF-\xce\xb2, TGF-\xce\xb2-R2, p-Smad2/3 and myofibroblasts as well as the reduction of TGF-\xce\xb2-R1 (P\xe2\x…	2014
["5'-nucleotidase, cytosolic IA(NT5C1A)\r\n"]	25404086_15	CONCLUSION: The early withdrawal of CNI limited the fibrosis progression through the stabilization of chronicity index and of the canonical TGF-\xce\xb2 signalling pathway.	2014
["5'-nucleotidase, cytosolic IA(NT5C1A)\r\n"]	24685602_7	Predictive factors for progression to severe fibrosis were: use of tacrolimus as main CNI, recipient age at time of biopsy<55, donor age \xe2\x89\xa545, graft HCV re-infection<3months, biologically suspected graft re-infection and lack of response to antiviral treatment after LT. Multivariate analysis disclosed that only donor age \xe2\x89\xa545 (hazard ratio 2.243, 95%CI 1.264-3.983, P=0.0058) a…	2014
["5'-nucleotidase, cytosolic IA(NT5C1A)\r\n"]	25496225_7	113 patients were switched from calcineurin inhibitor (CNI)-based therapy to low-dose sirolimus monotherapy at a median of 15 months after transplantation for HCV-related fibrosis (72%), renal impairment (14%) or high-risk HCC (5%).	2014
["5'-nucleotidase, cytosolic IA(NT5C1A)\r\n"]	25453134_2	BACKGROUND & AIMS: Robust clinical data evaluating fibrosis progression in hepatitis C virus (HCV) liver transplant patients receiving an mTOR inhibitor vs. calcineurin inhibitor (CNI) are lacking.	2014
["5'-nucleotidase, cytosolic IA(NT5C1A)\r\n"]	25404086_3	One of the limiting factors is calcineurin inhibitor (CNI)-induced fibrosis.	2014
["5'-nucleotidase, cytosolic IA(NT5C1A)\r\n"]	25453134_6	Ishak-Knodell fibrosis score decreased from baseline to month 12 by a mean of -0.7 \xc2\xb1 1.1 with everolimus, but increased by 0.2 \xc2\xb1 1.2 with CNI (P = 0.046).	2014
["5'-nucleotidase, cytosolic IA(NT5C1A)\r\n"]	25404086_4	This study attempted to examine the histological aspect of interstitial fibrosis and the modulation of the transforming growth factor-\xce\xb2 (TGF-\xce\xb2) canonical signalling pathway following early withdrawal of CNI from sirolimus-based immunosuppressive therapy.	2014
["5'-nucleotidase, cytosolic IA(NT5C1A)\r\n"]	25453134_3	To evaluate fibrosis progression in maintenance liver transplant patients receiving everolimus- or CNI-based immunosuppression.	2014
["5'-nucleotidase, cytosolic IA(NT5C1A)\r\n"]	24515306_3	We aimed to investigate the effects of conversion from CNI to everolimus on parameters of fibrosis, inflammation, glomerulotubular damage and vascular functions in renal transplant recipients.	2014
["5'-nucleotidase, cytosolic IA(NT5C1A)\r\n"]	25207429_1	Progression of liver fibrosis in HCV-positive liver transplant recipients randomized to everolimus with reduced calcineurin inhibitor (CNI) therapy or a standard CNI regimen.	2014
["5'-nucleotidase, cytosolic IA(NT5C1A)\r\n"]	24954576_5	The unique set of genes differentially expressed in CNI biopsies compared with preimplantation controls was enriched for genes associated with fibrosis, early tubulointerstitial damage and in vitro CNIT.	2014
["5'-nucleotidase, cytosolic IA(NT5C1A)\r\n"]	25453134_5	RESULTS: For patients with biopsy data at month 12, mean Ishak-Knodell fibrosis score at baseline was 2.6 \xc2\xb1 0.9 (n = 14) with everolimus vs. 1.9 \xc2\xb1 1.1 (n = 18) with CNI (P = 0.043), and 1.9 \xc2\xb1 1.2 vs. 2.2 \xc2\xb1 1.3 at month 12.	2014
["5'-nucleotidase, cytosolic IA(NT5C1A)\r\n"]	25453134_11	CONCLUSIONS: This exploratory study suggests that conversion from CNI to everolimus reduces progression of liver fibrosis, and preserves renal function without jeopardising efficacy in liver transplant recipients with recurrent HCV, but is associated with a higher incidence of adverse events and serious adverse events.	2014
["5'-nucleotidase, cytosolic IA(NT5C1A)\r\n"]	23413991_7	Future studies examining the role of CNIs in hepatitis C virus-positive LT recipients are required to accurately examine the effects of CNIs on outcomes such as fibrosis progression, survival, and effects on response to antiviral therapy, to provide robust information that allows clinicians to make an informed choice concerning which CNI is best for their patients.	2013
["5'-nucleotidase, cytosolic IA(NT5C1A)\r\n"]	23580804_11	Therapy with CNI was associated with significant increases in scores for global glomerulosclerosis, tubular atrophy, interstitial fibrosis, nonnodular arteriolar hyalinosis (P < -0.001 for all), arteriolar smooth-muscle vacuolization (P = -0.02), juxtaglomerular hyperplasia (P = -0.002), and tubular microcalcinosis (P = -0.06).	2013
["5'-nucleotidase, cytosolic IA(NT5C1A)\r\n"]	23414365_6	Children treated with a low-dose calcineurin inhibitor (CNI) together with an mTOR inhibitor exhibited decreased subclinical rejection (0% vs. 19%, p = 0.001) and decreased interstitial fibrosis and tubular atrophy (IF/TA) (15% vs. 42%, p = 0.013) compared with patients treated with a conventional regimen consisting of normal-dose CNI and mycophenolate mofetil.	2013
["5'-nucleotidase, cytosolic IA(NT5C1A)\r\n"]	23414365_9	Treatment with low-dose CNI and mTOR inhibitor and high GFR directly after Tx are the main factors associated with less inflammation and fibrosis in PB and might therefore lead to better long-term graft function.	2013
["5'-nucleotidase, cytosolic IA(NT5C1A)\r\n"]	23037008_4	Endothelin (ET)-1, a potent endogenous vasoconstrictor, inducer of fibrosis, and vascular smooth muscle cell proliferation, may play a key role in both the development of CNI-induced nephrotoxicity and endothelial vasculopathy in chronic allograft rejection.	2012
["5'-nucleotidase, cytosolic IA(NT5C1A)\r\n"]	22954349_4	Everolimus, a mammalian target of rapamycin (mTOR) inhibitor, is not associated with graft fibrosis, has a superior cardiovascular risk profile to CNI therapy and has shown potential for the prevention and treatment of diverse forms of cancer.	2012
["5'-nucleotidase, cytosolic IA(NT5C1A)\r\n"]	22568654_2	We hypothesized that Nox2, the classical phagocytic NADPH oxidase, plays an important role in calcineurin inhibitor (CNI)-induced renal fibrosis.	2012
["5'-nucleotidase, cytosolic IA(NT5C1A)\r\n"]	21645256_4	We investigated IL-17 graft expression in renal transplant recipients with acute antibody-mediated rejection (ABMR), acute T-cell-mediated rejection (TCMR), interstitial fibrosis and tubular atrophy (IFTA) and acute tubular damage due to calcineurin-inhibitor toxicity (CNI).	2011
["5'-nucleotidase, cytosolic IA(NT5C1A)\r\n"]	21797971_8	Other potentially reversible chronic pathologies that may be detected, include chronic T-cell or antibody-mediated rejection, recurrent disease, BK virus-associated nephropathy, interstitial fibrosis and tubular atrophy and CNI nephrotoxicity, allowing modifications of therapy to limit ongoing graft injury.	2011
["5'-nucleotidase, cytosolic IA(NT5C1A)\r\n"]	21294787_6	In contrast, a significant increase in the fibrosis score [2 \xc2\xb1 1.1 (baseline) vs. 3.2 \xc2\xb1 1.7 (after 48 months of CNI treatment), P = 0.0002] was observed in the control group.	2011
["5'-nucleotidase, cytosolic IA(NT5C1A)\r\n"]	21446974_6	Pathological hallmarks of chronic CNI nephrotoxicity include stripped interstitial fibrosis, arteriolar hyalinosis and glomerular sclerosis, but with the exception of nodular arteriolar hyalinosis the findings are non specific.	2011
["5'-nucleotidase, cytosolic IA(NT5C1A)\r\n"]	21294787_7	The yearly fibrosis progression rate was of 0.05 \xc2\xb1 0.44 in the MMF group and 0.33 \xc2\xb1 0.24 in the CNI group (P = 0.04).	2011
["5'-nucleotidase, cytosolic IA(NT5C1A)\r\n"]	21606250_11	Our results provide strong evidence for a CNI-dependent induction of YB-1 in MCs that contributes to renal fibrosis via regulation of its own and collagen translation.	2011
["5'-nucleotidase, cytosolic IA(NT5C1A)\r\n"]	21473913_3	Because CNI-induced nephrotoxicity is strongly suspected in many renal allografts and significantly contributes to interstitial fibrosis and tubular atrophy, better tests are needed to diagnose nephrotoxicity in its early stages.	2011
["5'-nucleotidase, cytosolic IA(NT5C1A)\r\n"]	21812928_5	Urine was collected from 110 adults and 46 children with defined clinical conditions: healthy volunteers, stable renal transplant recipients, and recipients with clinical or subclinical acute rejection (AR) or BK infection (BKI), calcineurin inhibitor (CNI) toxicity or interstitial fibrosis (IFTA).	2011
["5'-nucleotidase, cytosolic IA(NT5C1A)\r\n"]	21176747_4	Therefore, the aim of this retrospective cohort study was to determine the effects of the widely used calcineurin inhibitors (CNI) cyclosporine A (CsA) and tacrolimus (Tac) on hepatitis C virus replication, inflammatory activity, development of liver fibrosis, and long-term renal graft function.	2010
["5'-nucleotidase, cytosolic IA(NT5C1A)\r\n"]	20883287_3	The aim of this study is to investigate the interstitial fibrosis (ci) and tubular atrophy (ct) progression from the baseline to first year under a mTORi-based, CNI-free regimen.	2010
["5'-nucleotidase, cytosolic IA(NT5C1A)\r\n"]	20946524_3	Medullary ray injury (MRI) is a pathological feature of many non-immune injuries inducing IF/TA and pathological determination of calcineurin inhibitor (CNI) toxicity proceeding to striped fibrosis.	2010
["5'-nucleotidase, cytosolic IA(NT5C1A)\r\n"]	19651292_4	Chronic allograft nephropathy (CAN) is a continuing threat to improved long-term outcomes, and regimens that involve calcineurin inhibitors (CNI) are implicated as a result of the progressive fibrosis they promote in renal allografts.	2009
["5'-nucleotidase, cytosolic IA(NT5C1A)\r\n"]	19930313_13	Protocols using CNI-free immunosuppression are interesting options to prevent fibrosis in chronic allograft dysfunction.	2009
["5'-nucleotidase, cytosolic IA(NT5C1A)\r\n"]	19060552_4	The most common phenotype associated with progressive graft dysfunction is the development of interstitial fibrosis and tubular atrophy not otherwise specified, a hallmark finding of chronic allograft nephropathy as well as CNI toxicity.	2008
["5'-nucleotidase, cytosolic IA(NT5C1A)\r\n"]	18192922_11	RESULTS: The RAPA group showed a significant regression of glomerulosclerotic lesions and only a 26% increase in interstitial fibrosis after 2 years compared to baseline, whereas the CNI group showed progression of glomerulosclerosis and 112% increase in fibrosis.	2008
["5'-nucleotidase, cytosolic IA(NT5C1A)\r\n"]	18217899_14	Early CNI withdrawal, prior to significant graft damage, has generally improved CrCl and markers of fibrosis and decreased chronic allograft lesions, a finding also observed with sirolimus in most CNI avoidance studies.	2008
["5'-nucleotidase, cytosolic IA(NT5C1A)\r\n"]	18684975_2	The calcineurin inhibitor (CNI)-induced renal fibrosis is attributed to an exaggerated deposition of extracellular matrix, which is mainly due to an increased expression of TGFbeta.	2008
["5'-nucleotidase, cytosolic IA(NT5C1A)\r\n"]	19060552_9	SUMMARY: Until the day transcriptomic assays and high-density microarrays are available routinely to detect the incipient graft injury, early allograft biopsy, preferably during the first 3-6 months of transplantation can detect the presence of interstitial fibrosis and tubular atrophy not otherwise specified before the onset of graft dysfunction and replacement of CNI with sirolimus could preven…	2008
["5'-nucleotidase, cytosolic IA(NT5C1A)\r\n"]	19060552_6	RECENT FINDINGS: Early detection of interstitial fibrosis and tubular atrophy offers the opportunity for replacement of the CNI with mammalian target of rapamycin inhibitors.	2008
["5'-nucleotidase, cytosolic IA(NT5C1A)\r\n"]	15644002_11	MMF in combination with CNI taper showed a positive effect on fibrosis progression, graft inflammation and ALT levels and may improve the clinical course of HCV after OLT, however, the antiviral properties of MMF are still unconfirmed.	2005
["5'-nucleotidase, cytosolic IA(NT5C1A)\r\n"]	15710287_16	Comparison of histologic scores of biopsies with explanted hearts showed the following: CN 1.33 (S.D.=1.4)/0.21 (S.D.=0.66; P<.001); CB: 2.1 (S.D.=0.93)/0.83 (S.D.=0.28; NS); MC: 0.88 (S.D.=1.19)/0.13 (S.D.=0.34; P<.01); IE: 1.71 (S.D.=1.27)/0.38 (S.D.=0.65; NS); fibrosis: 1.08 (S.D.=1.35)/1.75 (S.D.=1.26; NS); and MW: 1.50 (S.D.=1.22)/0.59 (S.D.=0.73; P<.01).	2005
["5'-nucleotidase, cytosolic II(NT5C2)\r\n"]	26157043_6	Hypertrophic marker genes, extracellular matrix-regulating factors, and expression patterns of fibrosis markers were examined in \xce\xb1MHC-AT1R(tg/+) ventricles (with or without SIL) and corroborated by investigating different components of the natriuretic peptide/PDE5/cGMP pathway as well as cardiac functions.	2015
["5'-nucleotidase, cytosolic II(NT5C2)\r\n"]	25797801_5	Riociguat stimulates sGC directly in a nitric oxide (NO)-independent manner, thereby increasing the sensitivity of sGC to NO, and also in synergy with NO, leading to increased production of cyclic guanosine monophosphate, an intracellular messenger involved in regulating vascular tone, smooth muscle cell proliferation, fibrosis and inflammation.	2015
["5'-nucleotidase, cytosolic II(NT5C2)\r\n"]	25626868_1	Direct interactions between ENaC gamma subunit and ClCN2 in cystic fibrosis epithelial cells.	2015
["5'-nucleotidase, cytosolic II(NT5C2)\r\n"]	25817717_3	Here, we aimed to demonstrate that riociguat, the drug candidate for clinical trials in systemic sclerosis (SSc), is effective in experimental fibrosis and to compare its efficacy to that of phosphodiesterase V inhibitors that also increase the intracellular levels of cyclic guanosine monophosphate.	2015
["5'-nucleotidase, cytosolic II(NT5C2)\r\n"]	25622251_4	In this review article, identified effects and mechanisms of cGMP and cAMP regarding renal fibrosis are summarized.	2015
["5'-nucleotidase, cytosolic II(NT5C2)\r\n"]	26387628_4	Recently, increased intracellular cyclic GMP (cGMP) levels were demonstrated to improve fibrosis levels in various diseases.	2015
["5'-nucleotidase, cytosolic II(NT5C2)\r\n"]	26091236_8	Moreover, diosgenin had the effects of increasing the cardiac levels of cGMP via modulation of phosphodiesterase-5 (PDE5) activity, and in improving myocardial fibrosis in the DOX-treated mice.	2015
["5'-nucleotidase, cytosolic II(NT5C2)\r\n"]	26429773_4	The cAMP/cGMP-regulated cystic fibrosis transmembrane conductance regulator (CFTR) is the primary chloride channel at the apical membrane of intestinal epithelial cells and plays a major role in intestinal fluid secretion and homeostasis.	2015
["5'-nucleotidase, cytosolic II(NT5C2)\r\n"]	26410556_4	Thus, enhancement of NO/cGMP represents a potential therapeutic strategy to target myofibroblast activation and therefore fibrosis.	2015
["5'-nucleotidase, cytosolic II(NT5C2)\r\n"]	26410556_3	TGF\xce\xb21 is considered the key inducer of fibrosis and drives myofibroblast differentiation in cells of diverse histological origin by a pro-oxidant shift in redox homeostasis associated with decreased nitric oxide (NO)/cGMP signaling.	2015
["5'-nucleotidase, cytosolic II(NT5C2)\r\n"]	24573388_1	Increasing cGMP-dependent protein kinase activity attenuates unilateral ureteral obstruction-induced renal fibrosis.	2014
["5'-nucleotidase, cytosolic II(NT5C2)\r\n"]	25139994_1	Roles of cGMP-dependent protein kinase I (cGKI) and PDE5 in the regulation of Ang II-induced cardiac hypertrophy and fibrosis.	2014
["5'-nucleotidase, cytosolic II(NT5C2)\r\n"]	25139994_2	Conflicting results have been reported for the roles of cGMP and cGMP-dependent protein kinase I (cGKI) in various pathological conditions leading to cardiac hypertrophy and fibrosis.	2014
["5'-nucleotidase, cytosolic II(NT5C2)\r\n"]	25027872_5	In response to 21 days of transverse aortic constriction, mice with cardiomyocyte-restricted inactivation (knockout) of the ANP receptor (guanylyl cyclase [GC]-A) or the downstream cGMP-dependent protein kinase I developed enhanced left ventricular hypertrophy and fibrosis together with contractile dysfunction.	2014
["5'-nucleotidase, cytosolic II(NT5C2)\r\n"]	24567525_13	CONCLUSIONS: We elucidated the antifibrotic mode of action of the sGC that increases cGMP levels, blocks non-canonical TGF\xce\xb2 signalling and inhibits experimental fibrosis.	2014
["5'-nucleotidase, cytosolic II(NT5C2)\r\n"]	25416030_1	Chronic inhibition of cyclic guanosine monophosphate-specific phosphodiesterase 5 prevented cardiac fibrosis through inhibition of transforming growth factor \xce\xb2-induced Smad signaling.	2014
["5'-nucleotidase, cytosolic II(NT5C2)\r\n"]	24573388_2	Our previous studies support the protective effect of cGMP and cGMP-dependent protein kinase I (PKG-I) pathway on the development of renal fibrosis.	2014
["5'-nucleotidase, cytosolic II(NT5C2)\r\n"]	24948380_3	Gene-targeting studies have not defined a clear role for its major downstream effector, cGMP-dependent protein kinase I (cGKI), in cardiac hypertrophy, but do implicate cGMP-cGKI signaling in fibrosis and I/R injury.	2014
["5'-nucleotidase, cytosolic II(NT5C2)\r\n"]	24561283_2	Cystic fibrosis (CF), the most common, life-threatening monogenetic disease in Caucasians, is caused by mutations in the CFTR gene, encoding a cAMP- and cGMP-regulated epithelial chloride channel.	2014
["5'-nucleotidase, cytosolic II(NT5C2)\r\n"]	25370039_3	This gene codes for an intestinal transmembrane receptor that generates cyclic GMP, which activates cystic fibrosis transmembrane receptor.	2014
["5'-nucleotidase, cytosolic II(NT5C2)\r\n"]	24948380_2	cGMP inhibits hypertrophy, decreases fibrosis, and protects against cardiac ischemia-reperfusion (I/R) injury.	2014
["5'-nucleotidase, cytosolic II(NT5C2)\r\n"]	24259420_3	CNP binds to natriuretic receptors in the basolateral membrane, elevates cellular cGMP, and opens cystic fibrosis transmembrane conductance regulator (CFTR) chloride channels in the apical membrane.	2013
["5'-nucleotidase, cytosolic II(NT5C2)\r\n"]	23695404_6	CONCLUSION: NO-iNOS biology in Peyronie patients is the very protagonist in modulating penile fibrosis through up-regulation of NO-cGMP pathway that influences penile health by preventing and reversing fibrosis in the tunical albuginea.	2013
["5'-nucleotidase, cytosolic II(NT5C2)\r\n"]	23684677_4	The new paradigm presumes the following sequence of events in HFPEF: 1) a high prevalence of comorbidities such as overweight/obesity, diabetes mellitus, chronic obstructive pulmonary disease, and salt-sensitive hypertension induce a systemic proinflammatory state; 2) a systemic proinflammatory state causes coronary microvascular endothelial inflammation; 3) coronary microvascular endothelial inf…	2013
["5'-nucleotidase, cytosolic II(NT5C2)\r\n"]	24001336_6	Binding of linaclotide to GC-C receptor triggers the elevation of second messenger cGMP that elicits fluid secretion into intestinal cells which play a critical role in maintaining homeostasis through cystic fibrosis transmembrane conductance regulator (CFTR).	2013
["5'-nucleotidase, cytosolic II(NT5C2)\r\n"]	24218053_3	The drug directly stimulates sGC in a nitric oxide independent manner, thereby increasing the sensitivity of sGC to nitric oxide, leading to increased cyclic guanosine monophosphate generation (a key signalling molecule involved in regulating vascular tone, proliferation, fibrosis and inflammation).	2013
["5'-nucleotidase, cytosolic II(NT5C2)\r\n"]	23760283_1	The cyclic GMP-dependent protein kinase I\xce\xb1 suppresses kidney fibrosis.	2013
["5'-nucleotidase, cytosolic II(NT5C2)\r\n"]	23760283_9	Thus, our results indicate that cGMP, acting primarily through cGKI\xce\xb1, is an important suppressor of kidney fibrosis.	2013
["5'-nucleotidase, cytosolic II(NT5C2)\r\n"]	23011470_11	The authors conclude that inhibition of aldosterone by amlodipine or aliskiren ameliorates diabetes induced renal injury via improvement of NO-cGMP pathway and reduction in oxidative stress and fibrosis, independent of BP changes.	2012
["5'-nucleotidase, cytosolic II(NT5C2)\r\n"]	22447941_12	Inhibition with shRNA improved cardiac remodeling and dysfunction by reducing infarction size and cardiac fibrosis and increased cGMP and PKG activity.	2012
["5'-nucleotidase, cytosolic II(NT5C2)\r\n"]	21846259_4	Furthermore, chronic ischemia that occurs with aging and medical co-morbidities is associated with the reduction of nitric oxide-cyclic guanosine monophosphate and ultimately cavernosal fibrosis.	2011
["5'-nucleotidase, cytosolic II(NT5C2)\r\n"]	21784461_6	Seven days after relief of obstruction we determined treatment effects on renal atrophy, apoptosis, fibrosis and nitric oxide/cyclic guanosine monophosphate signaling.	2011
["5'-nucleotidase, cytosolic II(NT5C2)\r\n"]	26579268_5	Chronic ischaemia is therefore not only associated with fibrosis but also with nitric oxide-cyclic guanosine monophosphate reduction.	2011
["5'-nucleotidase, cytosolic II(NT5C2)\r\n"]	20392817_10	Because 8-isoprostane stimulates ET-1 to potentiate oxidative stress and fibrosis, up-regulating HO-1 enhanced tissue antioxidant status alongside cellular targets such as adiponectin, AMPK, ANP, and cGMP to suppress ET-1, TGF-beta, and fibronectin with a corresponding decline of renal lesions, proteinuria/albuminuria, and thus improved renal function.	2010
["5'-nucleotidase, cytosolic II(NT5C2)\r\n"]	20132211_5	After 10 days, effects of KMUP-1 on survival, cardiac hypertrophy and fibrosis, the NO/guanosine 3'5'-cyclic monophosphate (cGMP)/protein kinase G (PKG) and hypertrophy signalling pathways [calcineurin A and extracellular signal-regulated kinase (ERK)1/2] were examined.	2010
["5'-nucleotidase, cytosolic II(NT5C2)\r\n"]	19864334_13	Similarly, hemin enhanced pancreatic HO, cGMP, and cAMP but suppressed 8-isoprostane and attenuated pancreatic histopathological lesions including fibrosis, interstitial edema, acinar cell necrosis, vacuolization, and mononuclear cell infiltration, with corresponding improvement of insulin production.	2009
["5'-nucleotidase, cytosolic II(NT5C2)\r\n"]	19570894_9	Finally, inhibition of the cystic fibrosis transmembrane regulator (CFTR) Cl(-) conductance blocked depolarization of GI neurons to decreased glucose or AMPK activation, whereas decreased glucose, AMPK activation, and 8-Br-cGMP increased VMH CFTR phosphorylation.	2009
["5'-nucleotidase, cytosolic II(NT5C2)\r\n"]	19668089_5	After 4 weeks, the myocardial levels of cyclic guanosine monophosphate (cGMP), left ventricular function, myocyte hypertrophy, interstitial fibrosis, myocardial capillary vessel density, and activity of one prominent substrate of cGMP, vasodilator-stimulated phosphoprotein (VASP) that may enhance angiogenesis, were measured.	2009
["5'-nucleotidase, cytosolic II(NT5C2)\r\n"]	19668089_6	Carperitide treatment increased the myocardial levels of cGMP and attenuated the functional severity along with a decreased myocyte cross-sectional area, interstitial fibrosis, and an increased capillary to myocyte ratio.	2009
["5'-nucleotidase, cytosolic II(NT5C2)\r\n"]	19749255_6	We have shown that an increase in the intracellular c-di-GMP levels favors biofilm formation due to its role as a cofactor for the synthesis of several types of extracellular polysaccharides, including PEL and alginate, the two key virulence factors of P. aeruginosa during infection of patients with cystic fibrosis.	2009
["5'-nucleotidase, cytosolic II(NT5C2)\r\n"]	19926883_6	Chronic ischemia is therefore associated with fibrosis but also with nitric oxide-cGMP reduction.	2009
["5'-nucleotidase, cytosolic II(NT5C2)\r\n"]	19737918_8	Our results identify cGK I-mediated Ser188 phosphorylation of RhoA as a converging node for pro- and antifibrotic signals and may explain how diminished cGMP signaling, commonly associated with vascular malfunction, predisposes individuals to vascular fibrosis.	2009
["5'-nucleotidase, cytosolic II(NT5C2)\r\n"]	18668237_2	The bceA(J) gene from the cystic fibrosis isolate Burkholderia cenocepacia J2315 encodes a 56-kDa bifunctional protein, with phosphomannose isomerase (PMI) and guanosine diphosphate (GDP)-mannose pyrophosphorylase (GMP) activities, a new member of the poorly characterised type II PMI class of proteins.	2008
["5'-nucleotidase, cytosolic II(NT5C2)\r\n"]	18824663_9	By concomitantly upregulating HO activity and cGMP and potentiating the total antioxidant status, hemin therapy reduced hypertension, suppressed oxidative stress, and attenuated extracellular matrix and remodeling proteins, with a reduction of histopathologic lesions that characterize cardiac fibrosis, hypertrophy, and end-stage organ damage.	2008
["5'-nucleotidase, cytosolic II(NT5C2)\r\n"]	18537617_1	NO signaling through cGMP in renal tissue fibrosis and beyond: key pathway and novel therapeutic target.	2008
["5'-nucleotidase, cytosolic II(NT5C2)\r\n"]	17267074_5	In the present study, we determined whether deficiency of NPRA/cGMP signaling alters the cardiac pro-inflammatory cytokines gene expression in Npr1 (coding for NPRA) gene-knockout (Npr1(-/-)) mice exhibiting cardiac hypertrophy and fibrosis as compared with control wild-type (Npr1(+/+)) mice.	2007
["5'-nucleotidase, cytosolic II(NT5C2)\r\n"]	17643962_5	We measured the functional properties of the alpha(2)beta(1) isoform by utilizing the NO-dependent activation of the ion channel cystic fibrosis transmembrane conductance regulator (CFTR), which occurs by phosphorylation via the membrane-bound type II isoform of cGMP-dependent protein kinase.	2007
["5'-nucleotidase, cytosolic II(NT5C2)\r\n"]	17659276_11	In summary, our data indicate that drugs interfering with the cyclic AMP (cAMP)-as well as with the NO-cGMP-pathway offer the therapeutic opportunity to prevent the differentiation of pulmonary fibroblasts to myofibroblasts in lung fibrosis.	2007
["5'-nucleotidase, cytosolic II(NT5C2)\r\n"]	17888043_8	CONCLUSIONS: A long-term single daily dose of tadalafil prevented CVOD and the underlying corporal fibrosis in the rat caused by CN damage, as effectively as the previously reported continuous treatment with vardenafil or sildenafil, through a cGMP-related mechanism that appears to be independent of inducible nitric oxide synthase induction.	2007
["5'-nucleotidase, cytosolic II(NT5C2)\r\n"]	17586695_3	Here, we show that increasing cGMP levels to inhibit epithelial Na(+) channel in cystic fibrosis (CF) respiratory epithelial cells corrects several aspects of the downstream pathology in CF.	2007
["5'-nucleotidase, cytosolic II(NT5C2)\r\n"]	17586695_1	Pharmacological modulation of cGMP levels by phosphodiesterase 5 inhibitors as a therapeutic strategy for treatment of respiratory pathology in cystic fibrosis.	2007
["5'-nucleotidase, cytosolic II(NT5C2)\r\n"]	16982964_9	Thus, stimulation of sGC by BAY41-2272 attenuates fibrosis of the left ventricle in rats with angiotensin II-induced hypertension partly in a pressure-independent manner, suggesting an important role for sGC generating cGMP in inhibiting cardiovascular remodeling.	2006
["5'-nucleotidase, cytosolic II(NT5C2)\r\n"]	17142267_2	Single channel and macroscopic current recording was used to investigate block of the cystic fibrosis transmembrane conductance regulator (CFTR) Cl(-) channel pore by the permeant anion Au(CN)2(-).	2006
["5'-nucleotidase, cytosolic II(NT5C2)\r\n"]	16612392_1	Endosomal hyperacidification in cystic fibrosis is due to defective nitric oxide-cylic GMP signalling cascade.	2006
["5'-nucleotidase, cytosolic II(NT5C2)\r\n"]	15631997_6	Fibroblast proliferation, thought to play a central role in the progression of fibrosis, was suppressed by in vitro exposure to CO. CO caused increased cellular levels of p21(Cip1) and decreased levels of cyclins A and D. This effect was independent of the observed suppression of MAPK's phosphorylation by CO but was dependent on increased cGMP levels.	2005
["5'-nucleotidase, cytosolic II(NT5C2)\r\n"]	15778276_10	In the presence of pressure overload, myocardial cGMP levels were reduced, and ventricular hypertrophy, fibrosis, filling pressures, and mortality were increased in DN-NPRA compared with WT-NPRA mice.	2005
["5'-nucleotidase, cytosolic II(NT5C2)\r\n"]	16048904_1	Enhancing cGMP in experimental progressive renal fibrosis: soluble guanylate cyclase stimulation vs. phosphodiesterase inhibition.	2005
["5'-nucleotidase, cytosolic II(NT5C2)\r\n"]	16048904_4	The present study compares the effects of the cGMP production-increasing soluble guanylate cyclase (sGC) stimulator BAY 41-2272 with those of the cGMP degradation-limiting phosphodiesterase inhibitor pentoxifylline (PTX) in a progressive model of renal fibrosis.	2005
["5'-nucleotidase, cytosolic II(NT5C2)\r\n"]	16382016_6	They activate enterocytes via guanylate cyclase C (GC-C), which leads to cGMP-dependent inhibition of Na+/H+ exchange and activation of the cystic fibrosis transmembrane regulator.	2005
["5'-nucleotidase, cytosolic II(NT5C2)\r\n"]	15710627_9	The findings of this study demonstrate that disruption of NPRA/cGMP signaling promotes hypertrophic growth and extracellular matrix remodeling, leading to the development of cardiac hypertrophy, myocardial fibrosis, and congestive heart failure.	2005
["5'-nucleotidase, cytosolic II(NT5C2)\r\n"]	15872007_1	STa and cGMP stimulate CFTR translocation to the surface of villus enterocytes in rat jejunum and is regulated by protein kinase G. The cystic fibrosis transmembrane conductance regulator (CFTR) is critical to cAMP- and cGMP-activated intestinal anion secretion and the pathogenesis of secretory diarrhea.	2005
["5'-nucleotidase, cytosolic II(NT5C2)\r\n"]	15973963_11	Our results suggested that the mechanism of reduction in ventricular hypertrophy and fibrosis following long-term L-arginine administration in SHR may stem from increased myocardial nitric oxide-cGMP signaling, independent of AP and EDV of thoracic aorta.	2005
["5'-nucleotidase, cytosolic II(NT5C2)\r\n"]	16048904_11	In conclusion, increasing renal cGMP production through BAY 41-2272 significantly improved renal NO-cGMP signaling and limited progression in anti-Thy-1-induced chronic renal fibrosis, whereas inhibition of cGMP degradation by PTX was only moderately effective.	2005
["5'-nucleotidase, cytosolic II(NT5C2)\r\n"]	14986129_10	It does so by activating guanylate cyclase-C receptor, increasing intracellular cGMP concentration, and phosphorylating the cystic fibrosis transmembrane conductance regulator (CFTR) protein by the cGMP-dependent protein kinase II.	2004
["5'-nucleotidase, cytosolic II(NT5C2)\r\n"]	14996430_3	Long-term inhibition of iNOS activity, presumably by blocking nitric oxide (NO)- and cGMP-mediated effects triggered by iNOS expression, exacerbates tissue fibrosis through an increase in: (a) collagen synthesis, (b) levels of reactive oxygen species (ROS), and (c) the differentiation of fibroblasts into myofibroblasts.	2004
["5'-nucleotidase, cytosolic II(NT5C2)\r\n"]	14708417_4	The vehicle group demonstrated increased right ventricular weight, pulmonary artery medial wall thickening, myocardial fibrosis, increased plasma cyclic guanosine monophosphate (cGMP) concentration and reduced body weight gains.	2004
["5'-nucleotidase, cytosolic II(NT5C2)\r\n"]	15049831_4	This binding causes an increase in the concentration of cGMP as a second messenger in cells and activates protein kinase A and cystic fibrosis transmembrane conductance regulator.	2004
["5'-nucleotidase, cytosolic II(NT5C2)\r\n"]	12967196_5	The MCT group demonstrated increased right ventricular weights, medial wall thickening in the pulmonary arteries, myocardial fibrosis and the level of plasma cyclic guanosine monophosphate (cGMP), along with decreased body weight gains.	2003
["5'-nucleotidase, cytosolic II(NT5C2)\r\n"]	12816755_12	These results indicate that kallikrein-kinin attenuates cardiac hypertrophy and fibrosis and enhances capillary growth in SHR through the suppression of JNK, TGF-beta 1, and plasminogen activator inhibitor-1 via the nitric oxide-cGMP pathway.	2003
["5'-nucleotidase, cytosolic II(NT5C2)\r\n"]	11850730_6	Chronic ischemia is, therefore, associated with fibrosis but also with nitric oxide (NO)-cyclic guanosine monophosphate.	2002
["5'-nucleotidase, cytosolic II(NT5C2)\r\n"]	12444076_4	Binding of ligands to GC-C leads to accumulation of intracellular cGMP, the activation of protein kinases G and A, and phosphorylation of the cystic fibrosis transmembrane conductance regulator (CFTR), a chloride channel that regulates salt and water secretion.	2002
["5'-nucleotidase, cytosolic II(NT5C2)\r\n"]	11950846_4	Activation of GCC catalyzes the formation of cGMP, initiating a signaling cascade that opens the cystic fibrosis transmembrane conductance regulator chloride channel at the apical cell surface.	2002
["5'-nucleotidase, cytosolic II(NT5C2)\r\n"]	12011439_4	At the transcriptional, translational, and cellular levels, we provide evidence that the Clara cells are well equipped with the bioactive peptide guanylin and proteins of the cGMP-signaling system including guanylate cyclase C, cGMP-dependent protein kinase II, and cystic fibrosis transmembrane conductance regulator (CFTR) together with the two CFTR scaffolding proteins EBP50/NHERF and E3KARP/NHE…	2002
["5'-nucleotidase, cytosolic II(NT5C2)\r\n"]	11927666_1	Multiple inhibitory effects of Au(CN)(2-) ions on cystic fibrosis transmembrane conductance regulator Cl(-) channel currents.	2002
["5'-nucleotidase, cytosolic II(NT5C2)\r\n"]	11927667_1	Molecular determinants of Au(CN)(2)(-) binding and permeability within the cystic fibrosis transmembrane conductance regulator Cl(-) channel pore.	2002
["5'-nucleotidase, cytosolic II(NT5C2)\r\n"]	11148737_6	Chronic ischaemia of the penis is associated with fibrosis of smooth muscle fibres and with endothelial and neuronal NO/cGMP pathways.	2001
["5'-nucleotidase, cytosolic II(NT5C2)\r\n"]	11596856_4	Luminally secreted peptides stimulate chloride and bicarbonate secretion in the intestine through the mechanism involving guanylate cyclase C receptor, cyclic GMP, protein kinase G and cystic fibrosis transmembrane conductance regulator (CFTR) chloride channel.	2001
["5'-nucleotidase, cytosolic II(NT5C2)\r\n"]	11208062_5	The immunofluorescence analysis of the distribution of five apical membrane markers (sucrase isomaltase, alkaline phosphatase, NHE-3 Na+/H+ exchanger, cGMP-dependent protein kinase, and cystic fibrosis trans-membrane conductance regulator), showed low levels of these proteins in their standard localization at the apical membrane as compared with normal duodenal epithelium processed in parallel.	2001
["5'-nucleotidase, cytosolic II(NT5C2)\r\n"]	11130775_6	DNA, cGMP, collagen, degree of fibrosis, and nitric oxide synthase-NADPH-diaphorase-dependent activity in the heart and arteries were determined.	2000
["5'-nucleotidase, cytosolic II(NT5C2)\r\n"]	11016642_2	The enteric peptides, guanylin and uroguanylin, are local regulators of intestinal secretion by activation of receptor-guanylate cyclase (R-GC) signaling molecules that produce cyclic GMP (cGMP) and stimulate the cystic fibrosis transmembrane conductance regulator-dependent secretion of Cl- and HCO3-.	2000
["5'-nucleotidase, cytosolic II(NT5C2)\r\n"]	10959824_2	The cystic fibrosis transmembrane conductance regulator (CFTR) is a cAMP and cGMP-regulated chloride channel critical to the regulation of intestinal fluid, chloride, and bicarbonate secretion.	2000
["5'-nucleotidase, cytosolic II(NT5C2)\r\n"]	10611481_5	The results showing, for the first time, correction of the CFTR mucin secretion defect by a PDE5 inhibitor, which may involve cyclic GMP, will have a major impact in development of a rational drug treatment for cystic fibrosis.	1999
["5'-nucleotidase, cytosolic II(NT5C2)\r\n"]	10224234_3	ST stimulates guanylyl cyclase C (GCC) and accumulation of intracellular cyclic GMP ([cGMP]i), which opens the cystic fibrosis transmembrane conductance regulator (CFTR)-related chloride channel, triggering intestinal secretion.	1999
["5'-nucleotidase, cytosolic II(NT5C2)\r\n"]	9758749_7	Methods and protocols were chosen for compatibility with large-scale cGMP production and were suitable for biochemical characterization and preclinical evaluation of rM/NEI as a therapeutic agent for cystic fibrosis.	1998
["5'-nucleotidase, cytosolic II(NT5C2)\r\n"]	9755058_7	These cells possess transcripts for cystic fibrosis transmembrane conductance regulator, Na+-K+-2Cl- cotransporter, STa receptor, and intestine-specific cGMP-dependent protein kinase II.	1998
["5'-nucleotidase, cytosolic II(NT5C2)\r\n"]	9609738_2	We have previously shown that C-type natriuretic peptide (CNP), a guanylate cyclase agonist, can stimulate cystic fibrosis transmembrane conductance regulator (CFTR)-mediated chloride secretion in murine airway epithelial cells via protein kinase (PK) A activation through the inhibition of cGMP-inhibited phosphodiesterases.	1998
["5'-nucleotidase, cytosolic II(NT5C2)\r\n"]	9465038_1	Membrane targeting of cGMP-dependent protein kinase is required for cystic fibrosis transmembrane conductance regulator Cl- channel activation.	1998
["5'-nucleotidase, cytosolic II(NT5C2)\r\n"]	9465038_2	A recently cloned isoform of cGMP-dependent protein kinase (cGK), designated type II, was implicated as the mediator of cGMP-provoked intestinal Cl- secretion based on its localization in the apical membrane of enterocytes and on its capacity to activate cystic fibrosis transmembrane conductance regulator (CFTR) Cl- channels.	1998
["5'-nucleotidase, cytosolic II(NT5C2)\r\n"]	9671794_4	We recently reported cloning of the cDNA for type II cGMP-dependent protein kinase (cGK II), elucidated its first known function of inhibiting the cystic fibrosis transmembrane conductance regulator in rat intestine, and initially described its location in rat kidney juxtaglomerular (JG) cells, the ascending thin limb, and the brush border of proximal tubules.	1998
["5'-nucleotidase, cytosolic II(NT5C2)\r\n"]	9374736_2	Inhibitors of guanosine 3',5'-cyclic monophosphate (cGMP)-inhibited phosphodiesterases stimulate Cl- transport across the nasal epithelia of cystic fibrosis mice carrying the delta F508 mutation [cystic fibrosis transmembrane conductance regulator (CFTR) (delta F/delta F)], suggesting a role for cGMP in regulation of epithelial ion transport.	1997
["5'-nucleotidase, cytosolic II(NT5C2)\r\n"]	9020133_1	cGMP stimulation of cystic fibrosis transmembrane conductance regulator Cl- channels co-expressed with cGMP-dependent protein kinase type II but not type Ibeta.	1997
["5'-nucleotidase, cytosolic II(NT5C2)\r\n"]	9282328_10	Receptor expression was observed in cells that had earlier been shown to express cGMP-dependent kinase, but not the cystic fibrosis transmembrane regulator, a known downstream target of cGMP/G-kinase, which suggests that GCC/ cGMP could regulate additional cellular signal transduction machinery.	1997
["5'-nucleotidase, cytosolic II(NT5C2)\r\n"]	9344659_3	Both uroguanylin and the related peptide ligand guanylin bind to GC-C and stimulate an increase in cyclic GMP, inducing chloride secretion via the cystic fibrosis transmembrane conductance regulator.	1997
["5'-nucleotidase, cytosolic II(NT5C2)\r\n"]	9020133_2	In order to investigate the involvement of cGMP-dependent protein kinase (cGK) type II in cGMP-provoked intestinal Cl- secretion, cGMP-dependent activation and phosphorylation of cystic fibrosis transmembrane conductance regulator (CFTR) Cl- channels was analyzed after expression of cGK II or cGK Ibeta in intact cells.	1997
["5'-nucleotidase, cytosolic II(NT5C2)\r\n"]	9436244_12	The associations between early GMP excretion and RIS and fibrosis at 26 weeks were highly significant (P < 0.001 and P < 0.0001, respectively).	1997
["5'-nucleotidase, cytosolic II(NT5C2)\r\n"]	8636133_2	The apical membrane of intestinal epithelial cells harbors a unique isozyme of cGMP-dependent protein kinase (cGK type II) which acts as a key regulator of ion transport systems, including the cystic fibrosis transmembrane conductance regulator (CFTR)-chloride channel.	1996
["5'-nucleotidase, cytosolic II(NT5C2)\r\n"]	8548288_10	The cGMP-binding domain may provide a useful target for pharmacologic intervention in cystic fibrosis.	1995
["5'-nucleotidase, cytosolic II(NT5C2)\r\n"]	7540975_4	By use of whole-cell patch clamp recordings, we show that nitric oxide activates cystic fibrosis transmembrane conductance regulator CI- currents in normal human cloned T cells by a cGMP-dependent mechanism.	1995
["5'-nucleotidase, cytosolic II(NT5C2)\r\n"]	7592887_1	Isotype-specific activation of cystic fibrosis transmembrane conductance regulator-chloride channels by cGMP-dependent protein kinase II.	1995
["5'-nucleotidase, cytosolic II(NT5C2)\r\n"]	7592887_2	Type II cGMP-dependent protein kinase (cGKII) isolated from pig intestinal brush borders and type I alpha cGK (cGKI) purified from bovine lung were compared for their ability to activate the cystic fibrosis transmembrane conductance regulator (CFTR)-Cl- channel in excised, inside-out membrane patches from NIH-3T3 fibroblasts and from a rat intestinal cell line (IEC-CF7) stably expressing recombin…	1995
["5'-nucleotidase, cytosolic II(NT5C2)\r\n"]	7512420_3	This in turn stimulates the cyclic-GMP- or cyclic-AMP-dependent protein kinase, activating the same chloride channel that is defective in cystic fibrosis.	1994
["5'-nucleotidase, cytosolic II(NT5C2)\r\n"]	7506258_10	Cyclic GMP also failed to activate gCl in cystic fibrosis cells.	1994
["5'-nucleotidase, cytosolic II(NT5C2)\r\n"]	7926485_10	CONCLUSIONS: Human colonocytes secrete Cl- in response to STa and cGMP in normal subjects, but this response is absent in cystic fibrosis.	1994
["5'-nucleotidase, cytosolic II(NT5C2)\r\n"]	7926485_8	In vitro Cl- transport in non-cystic fibrosis colonocytes increased threefold and fivefold with STa and 8-bromo-cGMP, respectively.	1994
["5'-nucleotidase, cytosolic II(NT5C2)\r\n"]	7926485_3	This study examined the effects of the cGMP activator Escherichia coli heat-stable enterotoxin (STa) on rectal ion transport of controls and subjects with cystic fibrosis.	1994
["5'-nucleotidase, cytosolic II(NT5C2)\r\n"]	7926485_2	BACKGROUND/AIMS: Calcium- and adenosine 3',5'-cyclic monophosphate (cAMP)-mediated Cl- secretions in the human colon are abnormal in cystic fibrosis, but the effect of guanosine 3',5'-cyclic monophosphate (cGMP) is unknown.	1994
["5'-nucleotidase, cytosolic II(NT5C2)\r\n"]	7926485_7	STa stimulated the cGMP concentration in rectal biopsy specimens from both control and cystic fibrosis subjects approximately twofold.	1994
["5'-nucleotidase, cytosolic II(NT5C2)\r\n"]	7506258_1	Activation of the cystic fibrosis transmembrane conductance regulator by cGMP in the human colonic cancer cell line, Caco-2.	1994
["5'-nucleotidase, cytosolic II(NT5C2)\r\n"]	1694413_2	Adenosine 3',5'-cyclic monophosphate (cAMP) and guanosine 3',5'-cyclic monophosphate (cGMP) levels were measured in labial gland slices from controls and patients with cystic fibrosis (CF).	1990
["5'-nucleotidase, cytosolic II(NT5C2)\r\n"]	3036776_2	The specific activities of phosphomannose isomerase (PMI), phosphomannomutase (PMM), GDP-mannose pyrophosphorylase (GMP), and GDP-mannose dehydrogenase (GMD) were compared in a mucoid cystic fibrosis isolate of Pseudomonas aeruginosa and in two spontaneous nonmucoid revertants.	1987
["5'-nucleotidase, cytosolic II(NT5C2)\r\n"]	2982532_5	The sweat obtained from patients with cystic fibrosis has been compared with that from normal children: the concentrations of cyclic AMP and cyclic GMP are the same.	1985
["5'-nucleotidase, cytosolic II(NT5C2)\r\n"]	2416317_3	We have reported previously that propranolol, which decreases the cAMP/cGMP ratio, potentiates the amount of fibrosis produced in a damaged lung.	1985
["5'-nucleotidase, cytosolic II(NT5C2)\r\n"]	6321366_14	Although atrial fibrillation may lead to some of these irregularities, a depressed cyclic GMP, increased fibrosis and increased left atrial dimension may play a role in the pathogenesis of irreversible atrial fibrillation.	1984
["5'-nucleotidase, cytosolic II(NT5C2)\r\n"]	6321366_6	The left atrial appendage was removed during open heart surgery and the tissue was analyzed for cell size, percent fibrosis and content of cyclic AMP and GMP.	1984
["5'-nucleotidase, cytosolic II(NT5C2)\r\n"]	6406263_6	These changes were a disarray of hepatic cords, portal fibrosis; calcification of cartilage matrix, dominance of chondroitin sulfate B, and keratosulfate over chondroitin sulfates A and C; aortic endothelial damage, segmental thickening, calcification, and chondroid cells in the intima; atrophy of epidermis and appendages, and increase in amorphous dermal matrix; waxy degeneration and atrophy of …	1983
["5'-nucleotidase, cytosolic II(NT5C2)\r\n"]	165210_8	The most striking comparison was the ratio of cyclic AMP to cyclic GMP excreted which was 9.09 plus or minus 0.50 in all normal children and 4.41 plus or minus 0.32 in children with cystic fibrosis (P smaller than 0.001).	1975
["5'-nucleotidase, cytosolic II(NT5C2)\r\n"]	165210_7	In general patients with cystic fibrosis excreted greater amounts of cyclic GMP than did normals.	1975
["5'-nucleotidase, cytosolic II(NT5C2)\r\n"]	165210_4	Cyclic GMP excretion normalized for body surface area also decreased with age, while the value for cyclic AMP (2.86 plus or minus 0.08 mumol/day/m2, mean plus or minus SE) was constant with age in both normals and cystic fibrosis children.	1975
["5'-nucleotidase, cytosolic II(NT5C2)\r\n"]	165210_2	The urinary excretion of adenosine 3',5'-monophosphate (cyclic AMP) and guanosine 3',5'-monophosphate (cyclic GMP) was examined in 98 normal children and 46 children with cystic fibrosis between the ages of 9 months and 18 yr. Diurnal variations in cyclic AMP and cyclic GMP excretion were observed in subjects from either group, and peak levels of cyclic nucleotide excretion were generally observe…	1975
["5'-nucleotidase, cytosolic IIIA(NT5C3A)\r\n"]	21217899_2	BACKGROUND: Congenital fibrosis of the extraocular muscles (CFEOM) describes a group of rare congenital eye movement disorders that result from the dysfunction of all or part of the oculomotor (CN 3) and the trochlear (CN 4) nerves, and/or the muscles these nerves innervate.	2011
["5'-nucleotidase, cytosolic IIIA(NT5C3A)\r\n"]	20137490_7	RESULTS: Patients with congenital fibrosis of the extraocular muscles exhibited hypoplasia of the oculomotor (CN3), abducens (CN6), trochlear (CN4) nerves, and the EOMs; hypoplasia of CN6 in the brainstem and an extra branch of the inferior division of CN3 to the lateral rectus were the most common but not the only presentation of Duane's retraction syndrome.	2010
["5'-nucleotidase, cytosolic IIIA(NT5C3A)\r\n"]	17389489_3	A quantitative MRI technique was developed to study the oculomotor nerve (CN3) and applied to congenital fibrosis of extraocular muscles (CFEOM) and congenital oculomotor palsy.	2007
["5'-nucleotidase, cytosolic IIIA(NT5C3A)\r\n"]	16678748_11	Patients with congenital fibrosis exhibited severe hypoplasia of CN3, moderate hypoplasia of CN6, and EOM hypoplasia, particularly severe for the superior rectus and levator muscles.	2006
["5'-nucleotidase, cytosolic IIIA(NT5C3A)\r\n"]	12819981_2	BACKGROUND: Congenital fibrosis of extraocular muscles (CFEOM) is a complex strabismus syndrome that typically occurs in isolation and results from dysfunction of all or part of cranial nerves III (CNIII) and IV (CNIV) and/or the muscles that these nerves innervate.	2003
["protein phosphatase 2 regulatory subunit B''gamma(PPP2R3C)\r\n"]	2382901_2	To investigate its role in pulmonary infections, concentrations of interleukin-1 were measured in 22 bronchoalveolar lavage fluid (BALF) samples from 19 children with cystic fibrosis (CF), and in 13 disease controls by enzyme-linked immunosorbent assay (ELISA) for IL-1 beta and the D10.G4.1 proliferation assay for IL-1 activity.	1990
["RNA 3'-terminal phosphate cyclase(RTCA)\r\n"]	25630419_1	Multidisciplinary Treatment of Cystic Fibrosis-Related Recurrent Pyogenic Cholangitis (CF-RPC).	2015
["RNA 3'-terminal phosphate cyclase(RTCA)\r\n"]	6849801_6	By contrast, neither the presence or absence nor the value of RPc could be related to cellularity or fibrosis.	1983
["RNA guanylyltransferase and 5'-phosphatase(RNGTT)\r\n"]	20346358_7	We first used RT-PCR to determine expression levels of mRNA of CLC (Cl(-) channels/transporters of CLC gene family) family members and CFTR (cystic fibrosis transmembrane conductance regulator) in HCE cells.	2010
1,4-alpha-glucan branching enzyme 1(GBE1)	26664050_10	CONCLUSION: Our findings indicated a novel role for GBE in the treatment of liver fibrosis.	2015
1,4-alpha-glucan branching enzyme 1(GBE1)	26547529_4	STUDY DESIGN: We investigated the protective effects of GbE on renal fibrosis in STZ-induced diabetic rats.	2015
1,4-alpha-glucan branching enzyme 1(GBE1)	26547529_10	CONCLUSION: GbE can prevent renal fibrosis in rats with diabetic nephropathy, which is most likely to be associated with its abilities to inhibit the Akt/mTOR signaling pathway.	2015
1,4-alpha-glucan branching enzyme 1(GBE1)	26664050_4	PURPOSE AND METHODS: Aimed to investigate the underlying protective mechanisms of GBE on carbon tetrachloride (CCl4)-induced liver fibrosis in rats.	2015
1,4-alpha-glucan branching enzyme 1(GBE1)	26664050_7	In addition, GBE at different doses was used to treat groups L and H. RESULTS: The results of hematoxylin and eosin staining, Masson's trichrome staining, a liver function index, and a liver fibrosis index showed that GBE application noticeably mitigated fibrosis and improved the function of the liver.	2015
1,4-alpha-glucan branching enzyme 1(GBE1)	26547529_3	This study was designed to investigate the effects of an ethanolic GbE on renal fibrosis in diabetic nephropathy (DN) and to clarify the possible mechanism by which GbE prevents renal fibrosis.	2015
1,4-alpha-glucan branching enzyme 1(GBE1)	26664050_8	The western blotting and immunohistochemistry analyses indicated that GBE reduced liver fibrosis not only by inhibiting p38 MAPK and NF-\xce\xbaBp65 via inhibition of I\xce\xbaB\xce\xb1 degradation but also by inhibiting hepatocyte apoptosis via downregulation of Bax, upregulation of Bcl-2, and subsequent inhibition of caspase-3 activation.	2015
1,4-alpha-glucan branching enzyme 1(GBE1)	17105595_3	Ginkgo biloba extract (GbE) has been indicated to reverse hepatic fibrosis and exhibit therapeutic effects both in vitro and in vivo.	2006
1,4-alpha-glucan branching enzyme 1(GBE1)	17105595_10	CONCLUSIONS: Our results suggest that GbE confers its anti-fibrosis effects through inhibiting HSC proliferation, reducing TGF-beta1 and CTGF expression and consequently suppressing the collagen production and ECM secretion.	2006
1,4-alpha-glucan branching enzyme 1(GBE1)	16343076_11	But GbE could not reverse the pathological changes of liver fibrosis completely when compared with normal control.	2005
1,4-alpha-glucan branching enzyme 1(GBE1)	16343076_7	RESULTS: H&E, Masson's trichrome stainings and electron microscope study showed liver fibrosis in rats was greatly alleviated when treated with GbE.	2005
1,4-alpha-glucan branching enzyme 1(GBE1)	16343076_2	AIMS: To investigate the protective effect of Ginkgo biloba extract (GbE) on liver fibrosis induced by carbon tetrachloride (CCl4) in rats and expressions of transforming growth factor beta1 (TGF-beta1) and collagen I during this period.	2005
1,4-alpha-glucan branching enzyme 1(GBE1)	15052689_7	Microscopic studies revealed that the livers of rats receiving GbE showed alleviation in fibrosis (P<0.05) as well as expression of alphaSMA (P<0.01).	2004
1,4-alpha-glucan branching enzyme 1(GBE1)	15052689_6	RESULTS: Compared with saline-treated group, liver fibrosis rats treated with GbE had decreased serum total bilirubin (P<0.01) and aminotransferase levels (P<0.01) and increased levels of serum albumin (P<0.01).	2004
1,4-alpha-glucan branching enzyme 1(GBE1)	15052689_3	METHODS: Following confirmation of CCl(4)-induced liver fibrosis, GbE or saline was administrated to the rats for 4 weeks.	2004
1,4-alpha-glucan branching enzyme 1(GBE1)	15052689_2	AIM: To study the reversing effect of Ginkgo biloba extract (GbE) on established liver fibrosis in rats.	2004
1,4-alpha-glucan branching enzyme 1(GBE1)	15052689_10	CONCLUSION: Administration of GbE improved CCl(4)-induced liver fibrosis.	2004
1,4-alpha-glucan branching enzyme 1(GBE1)	15609412_6	RESULTS: Microscopic studies with Masson staining revealed mild liver fibrosis in aged rats (group N), while the livers of aged rats receiving GBE (group E) showed amelioration in fibrosis (2.2+/-0.1 vs 2.8+/-0.1, P<0.01) and deposition of lipofuscin (33.7+/-5.3 vs 62.8+/-5.7, P<0.01).	2004
1,4-alpha-glucan branching enzyme 1(GBE1)	3162725_7	Repeat liver biopsy at 4 years of age showed persistence of scattered hepatocellular periodic-acid Schiff-positive, diastase-resistant inclusions, but no progression of hepatic fibrosis in spite of persistent deficiency of hepatic branching enzyme activity.	1988
1-acylglycerol-3-phosphate O-acyltransferase 2(AGPAT2)	25660617_9	Stat3, Pim1, Akt1, Plcb2), fibrosis (e.g.	2015
1-acylglycerol-3-phosphate O-acyltransferase 2(AGPAT2)	24835153_9	RESULTS: A set of genes (FBN2, FST, GPRC5B, NOTCH3, PLCB1, DPT, DDIT4L and SGCG) were identified as potential predictors for radiation-induced fibrosis.	2014
2-aminoethanethiol dioxygenase(ADO)	23355385_3	EBC was collected from pediatric patients with cystic fibrosis (CF) during regular clinic visits over 1 yr. EBC biomarkers urea, adenosine (Ado), and phenylalanine (Phe) were measured by mass spectrometry, and biomarker ratios were used to control for variable dilution of airway secretions.	2013
2-aminoethanethiol dioxygenase(ADO)	22615171_8	Ado and AMP were successfully measured in 13/15 samples [8 cystic fibrosis (CF)].	2012
2-aminoethanethiol dioxygenase(ADO)	21560045_6	Intriguing is the case of cystic fibrosis patients, which do not accumulate airway ADO, but its precursor, AMP.	2011
2-aminoethanethiol dioxygenase(ADO)	21560045_2	The physiological relevance of the purinergic signaling network for airway defenses is emerging through cumulating reports of abnormal ATP and adenosine (ADO) levels in the airway secretions of patients with asthma, chronic pulmonary obstructive diseases, cystic fibrosis and idiopathic pulmonary fibrosis.	2011
2-aminoethanethiol dioxygenase(ADO)	20167933_2	Stimulation of the cystic fibrosis transmembrane conductance regulator (CFTR) by protease-activated receptors (PARs) at the basolateral membranes and by adenosine receptors (ADO-Rs) at the apical membrane maintain airway surface liquid (ASL) volume, which is required to ensure hydrated and clearable mucus.	2010
2-aminoethanethiol dioxygenase(ADO)	20805305_4	We measured DBS with pH and CO(2) electrodes, perfusing ADO \xc2\xb1 adenosine receptor agonists or antagonists or the cystic fibrosis transmembrane conductance regulator (CFTR) inhibitor CFTR(inh)-172 on DBS.	2010
2-aminoethanethiol dioxygenase(ADO)	19639288_3	The A(2B) adenosine receptor (A(2B)AR) is the predominant P1 purinergic receptor isoform expressed in surface airway epithelia, and Ado is an important regulator of airway surface liquid (ASL) volume through its activation of the cystic fibrosis transmembrane conductance regulator (CFTR).	2009
2-aminoethanethiol dioxygenase(ADO)	19244482_2	The ability of adenosine (ADO) to inhibit proliferation and protein synthesis (in particular, collagen synthesis) in cardiac fibroblasts (CF) may ameliorate adverse cardiac remodeling and fibrosis seen in heart failure patients.	2009
2-aminoethanethiol dioxygenase(ADO)	18367727_4	However, stimulation of the cystic fibrosis transmembrane conductance regulator (CFTR) by ADO may be crucial in permitting the superficial epithelium to maintain airway surface liquid (ASL) volume, which is required to ensure hydrated and clearable mucus.	2008
2-aminoethanethiol dioxygenase(ADO)	18367727_9	Removal of ADO with ADO deaminase and replacement with 5'N-ethylcarboxamide adenosine resulted in dose-dependent changes in ASL height, and suggested that the cell surface (ADO) may be in excess of 1 microM, which is sufficient to activate A(2B)-R. A(2B)-R are required for ASL volume homeostasis in human airways, and therapies directed at inhibiting A(2B)-R may lead to a cystic fibrosis-like phen…	2008
2-aminoethanethiol dioxygenase(ADO)	16636206_10	ATP was also found to acutely regulate ASL volume by inducing secretion in normal and cystic fibrosis (CF) cultures, while its metabolite adenosine (ADO) evoked secretion in normal cultures but stimulated absorption in CF cultures.	2006
2-aminoethanethiol dioxygenase(ADO)	16460283_5	This review provides an update on our current understanding of how shear stress regulates ASL volume height in normal and cystic fibrosis (CF) airway epithelia through extracellular ATP- and adenosine (ADO)-mediated pathways that modulate ion transport and ASL volume homeostasis.	2006
2-aminoethanethiol dioxygenase(ADO)	15983038_11	These observations unveil a novel mechanism by which AdoMet could ameliorate liver fibrosis.	2005
2-aminoethanethiol dioxygenase(ADO)	15983038_2	To study the anti-fibrogenic mechanisms of S-adenosylmethionine (AdoMet), transgenic mice harboring the -17 kb to +54 bp of the collagen alpha2 (I) promoter (COL1A2) cloned upstream from the beta-gal reporter gene were injected with carbon tetrachloride (CCl4) to induce fibrosis and coadministered either AdoMet or saline.	2005
2-aminoethanethiol dioxygenase(ADO)	15820046_10	ADO and amplification failure were 10.3 and 2.2% for beta-thalassaemia and 17.9 and 2.2% for cystic fibrosis respectively.	2005
2-aminoethanethiol dioxygenase(ADO)	15284071_2	Cardiac fibroblasts (CF) express adenosine (ADO) receptors, and pharmacological evidence suggests the possible involvement of the A2 (A2a and A2b) receptor (A2aR and A2bR) subtypes in inhibiting cell functions involved in fibrosis.	2004
2-aminoethanethiol dioxygenase(ADO)	15039139_2	We investigated cystic fibrosis (CF) transmembrane conductance regulator (CFTR) regulation by A2 adenosine (Ado) receptors and beta2 adrenergic receptors in CFTR-corrected CFBE41o- airway cells and human subjects.	2004
2-aminoethanethiol dioxygenase(ADO)	11948975_1	Transition in cystic fibrosis: much ado about nothing?	2002
2-aminoethanethiol dioxygenase(ADO)	11741811_2	We investigated adenosine (Ado) activation of the cystic fibrosis transmembrane conductance regulator (CFTR) in vitro and in vivo.	2001
2-aminoethanethiol dioxygenase(ADO)	9950763_4	In a simplified model using COS-7 cells, we demonstrate acquisition of an ATP-, ADP-, AMP-, and adenosine (ADO)-regulated halide permeability specifically following expression of wild-type (wt) cystic fibrosis transmembrane conductance regulator (CFTR).	1999
2-aminoethanethiol dioxygenase(ADO)	9604756_6	The application of simultaneous amplification of the above linked polymorphic markers allowed detection of more than half of the cases of ADO in blastomeres (19.4% for cystic fibrosis and 12.3% for beta-globin gene) and almost all ADOs in polar bodies, particularly when the two-step sequential analysis of the first and second polar body was applied in preimplantation diagnosis of single gene diso…	1998
2-aminoethanethiol dioxygenase(ADO)	8032638_9	A similar order of potency was seen in transformed cystic fibrosis nasal polyp cells, CFNPEo- (ADO > ATP > AMP > ADP).	1994
3-hydroxy-3-methylglutaryl-CoA reductase(HMGCR)	25023790_1	HMG-CoA reductase inhibition prior reperfusion improves reparative fibrosis post-myocardial infarction in a preclinical experimental model.	2014
3-hydroxy-3-methylglutaryl-CoA reductase(HMGCR)	23542580_1	HMGCoA reductase inhibition reverses myocardial fibrosis and diastolic dysfunction through AMP-activated protein kinase activation in a mouse model of metabolic syndrome.	2013
3-hydroxy-3-methylglutaryl-CoA reductase(HMGCR)	21971118_2	AIMS: To investigate the effects of 3-hydroxy-3-methylglutaryl coenzyme A (HMG-CoA) reductase inhibitor on the tissue damage and fibrosis of obstructed ureters, 80 rats were studied.	2011
3-hydroxy-3-methylglutaryl-CoA reductase(HMGCR)	17592071_1	HMG-CoA reductase inhibitors decrease angiotensin II-induced vascular fibrosis: role of RhoA/ROCK and MAPK pathways.	2007
3-hydroxy-3-methylglutaryl-CoA reductase(HMGCR)	15331935_3	In a mouse model of renal interstitial fibrosis induced by unilateral ureteral obstruction, fluvastatin, one of the lipophilic hydroxymethylglutaryl-CoA reductase inhibitors, was shown to ameliorate fibrosis.	2004
3-hydroxy-3-methylglutaryl-CoA reductase(HMGCR)	14519596_2	We investigated the effects of pravastatin, a competitive inhibitor of 3-hydroxy-3-methylglutaryl-coenzyme A (HMG-CoA) reductase, on interstitial inflammation and fibrosis, using an animal model of chronic cyclosporine A (CsA)-induced nephropathy.	2003
3-hydroxy-3-methylglutaryl-CoA reductase(HMGCR)	10070171_9	HMGCoA reductase inhibitors may ameliorate interstitial fibrosis complicating CsA therapy via direct actions on human renal cortical fibroblasts.	1999
3-hydroxyanthranilate 3,4-dioxygenase(HAAO)	19288023_1	Changes of hepatic proteome in bile duct ligated rats with hepatic fibrosis following treatment with Yin-Chen-Hao-Tang.	2009
3-hydroxyanthranilate 3,4-dioxygenase(HAAO)	16989967_1	Herb medicine Yin-Chen-Hao-Tang ameliorates hepatic fibrosis in bile duct ligation rats.	2006
3-ketodihydrosphingosine reductase(KDSR)	10457341_5	DSRS was performed in 11 children between the ages of 7 and 15 years: five for severe thrombocytopenia (group 1), four for advanced hypersplenism and congenital hepatic fibrosis prior to renal transplantation (group 2), and two for esophageal bleeding (group 3).	1999
3-ketodihydrosphingosine reductase(KDSR)	1853619_7	Postoperative pancreatitis occurred in 7.7% after DSRS-SPD and 3.2% after DSRS alone, with schistosomal hepatic fibrosis representing 86% of morbid cases.	1991
3-oxoacid CoA-transferase 1(OXCT1)	21254010_7	Chronic fibrosis, EMT and inflammation were observed in the UW and IGL groups, but limited in the SCOT group.	2011
3-oxoacid CoA-transferase 1(OXCT1)	21317838_10	SCOT-preserved kidneys showed low fibrosis, transforming growth factor-\xce\xb2 expression and apoptosis compared with the other groups.	2011
3-oxoacid CoA-transferase 1(OXCT1)	12715497_1	Scots launch cystic fibrosis screening for newborns.	2003
3-oxoacid CoA-transferase 2(OXCT2)	10801269_4	In the companion article (Umar S, Scott J, Sellin JH, Dubinsky WP, and Morris AP, Am J Physiol Gastrointest Liver Physiol 278: 753-764, 2000), we have shown that transmissible murine colonic hyperplasia (TMCH) increased cellular cystic fibrosis transmembrane conductance regulator (CFTR) mRNA and protein expression, relocalized CFTR within colonocytes, and enhanced mucosal cAMP-dependent Cl(-) sec…	2000
40S ribosomal protein S26(LOC101929876)	1375432_4	Forskolin or cAMP activated Cl channels with a conductance of 9 +/- 1 pS in 26 of 62 cell-attached patches of cystic fibrosis transmembrane conductance regulator (CFTR)-transfected CFPAC-1 cells.	1992
4-hydroxyphenylpyruvate dioxygenase(HPD)	10676720_5	Animals were fed a moderately high-protein diet (HPD, 36%) to accentuate the development of renal cysts and to promote interstitial fibrosis.	2000
5-hydroxytryptamine receptor 1E(HTR1E)	17022148_7	The degree of fibrosis was higher in group S (31.6% +/- 5.4%) than in group C (18.3% +/- 6.3%).	2006
5-hydroxytryptamine receptor 2A(HTR2A)	25667920_1	5-HT2B receptor antagonists inhibit fibrosis and protect from RV heart failure.	2015
5-hydroxytryptamine receptor 2A(HTR2A)	25667920_9	CONCLUSION: 5-HT2B receptor antagonists reduce collagen deposition, thereby inhibiting right ventricular fibrosis.	2015
5-hydroxytryptamine receptor 2A(HTR2A)	26259125_10	RESULTS: Despite the left ventricular 5-HT2BR overexpression, 5-HT2BR blockade by RS-127445 did not affect left ventricular hypertrophy and fibrosis in SHRs.	2015
5-hydroxytryptamine receptor 2A(HTR2A)	26259125_13	Finally, a subendocardial left ventricular fibrosis was induced by chronic serotonin in wild-type mice, which was increased in Htr2B animals, but prevented in Htr2A and Htr2A/2B mice, and could be explained by a contribution of the endothelial 5-HT2BRs to coronary vasodilatation.	2015
5-hydroxytryptamine receptor 2A(HTR2A)	25955005_5	Recent work has focused on several possible mechanisms for valvulopathy, specifically highlighting the serotonin or 5-hydroxy-trypta-mine-2B (5-HT2B) receptor subtype and the 5-HT transporter as mediators that cause expression of myofibroblast phenotype, excessive cell proliferation, leading to valve fibrosis.	2015
5-hydroxytryptamine receptor 2A(HTR2A)	25765500_14	However, benzofurans induce 5-HT2B receptor activation associated with heart valve fibrosis.	2015
5-hydroxytryptamine receptor 2A(HTR2A)	25045122_14	Thus, these data suggest that the 5-HT2A receptor may be a potential therapeutic target for ischemia-related biliary fibrosis after DCD liver transplantation.	2014
5-hydroxytryptamine receptor 2A(HTR2A)	25185755_9	These results demonstrated that 5-HT can directly activate PAFs through 5-HT2A receptor and promote fibroblasts phenotypic alterations and adventitia fibrosis depending on the signaling of the TGF-\xce\xb21/Smad3 pathway.	2014
5-hydroxytryptamine receptor 2A(HTR2A)	24934823_3	The echocardiographic and histological features of the severe valve fibrosis presented by this patient are very similar to those described with 5 HT(2B) receptors agonistic drugs.	2014
5-hydroxytryptamine receptor 2A(HTR2A)	22580238_5	Drugs which have agonist affinity for 5-HT(2B) receptors will probably promote heart valve fibrosis leading to heart failure.	2012
5-hydroxytryptamine receptor 2A(HTR2A)	23032152_7	This review highlights the diverse actions of serotonin signaling in the pathogenesis of fibrotic disease and explores how modulating the activity of specific 5-HT receptors, in particular the 5-HT2 subclass could have the potential to limit fibrosis and restore tissue regeneration.	2012
5-hydroxytryptamine receptor 2A(HTR2A)	21518801_5	Pharmacologic inactivation of 5-HT(2B) also effectively prevented the onset of experimental fibrosis and ameliorated established fibrosis.	2011
5-hydroxytryptamine receptor 2A(HTR2A)	21518801_4	Dermal fibrosis was reduced in 5-HT(2B)(-/-) mice using both inducible and genetic models of fibrosis.	2011
5-hydroxytryptamine receptor 2A(HTR2A)	22120177_9	Antagonism of 5-HT(2B) attenuated fibrogenesis and improved liver function in disease models in which fibrosis was pre-established and progressive.	2011
5-hydroxytryptamine receptor 2A(HTR2A)	21440001_5	The Fen-Phen episode sparked renewed interest in serotonin-mediated valve disease, and studies led to the identification of the 5-HT(2B) receptor as the likely molecular target leading to heart valve tissue fibrosis.	2011
5-hydroxytryptamine receptor 2A(HTR2A)	20671305_5	A study was undertaken to determine the expression of 5-HT receptors in IPF and experimental lung fibrosis and to investigate the effects of therapeutic inhibition of 5-HTR(2A/B) signalling on lung fibrosis in vivo and in vitro.	2010
5-hydroxytryptamine receptor 2A(HTR2A)	20671305_9	To assess the effects of 5HTR(2A/B) inhibition on fibrogenesis in vivo, mice were subjected to bleomycin-induced lung fibrosis and treated with the 5-HTR(2A/B) antagonist terguride (or vehicle) in a therapeutic approach (days 14-28 after bleomycin).	2010
5-hydroxytryptamine receptor 2A(HTR2A)	20671305_13	Blockade of 5-HTR(2A/B) signalling by terguride reversed lung fibrosis and is thus a promising therapeutic approach for IPF.	2010
5-hydroxytryptamine receptor 2A(HTR2A)	19570945_4	We have shown that activation of 5-HT(2B) receptors on human heart valve interstitial cells in vitro induces a proliferative response reminiscent of the fibrosis that typifies VHD.	2009
5-hydroxytryptamine receptor 2A(HTR2A)	18703754_4	Terguride, recognized as a partial dopamine agonist, also has potent 5-HT(2) receptor antagonist qualities and has been shown to prevent serotonin-induced organ changes and fibrosis in rats.	2008
5-hydroxytryptamine receptor 2A(HTR2A)	18703754_5	AIM: In the current study, the carbon tetrachloride (CCL(4)) hepatic fibrosis rat model was used in combination with daily administration of terguride to evaluate potential preventive effects of a 5-HT(2) receptor antagonist upon liver fibrosis.	2008
5-hydroxytryptamine receptor 2A(HTR2A)	18703754_12	CONCLUSION: Terguride, a potent 5-HT(2) antagonist, did not prevent the development of liver fibrosis in rats given CCL(4).	2008
5-hydroxytryptamine receptor 2A(HTR2A)	18321937_9	Interestingly, the 5-HT2B receptor was strongly expressed by fibroblasts in the fibroblastic foci in human idiopathic pulmonary fibrosis samples.	2008
5-hydroxytryptamine receptor 2A(HTR2A)	18321937_7	Blockage of 5-HT2A receptors by ketanserin and 5-HT2B receptors by SB215505 reduced bleomycin-induced lung fibrosis, as demonstrated by reduced lung collagen content and reduced procollagen 1 and procollagen 3 mRNA expression.	2008
5-hydroxytryptamine receptor 2A(HTR2A)	18362307_9	CONCLUSIONS: Our present case suggests that constrictive pericarditis may develop even on low-dose cabergoline, which might indicate that this reaction, as opposed to valvular fibrosis, is not mediated by a 5-HT(2B) agonistic mechanism.	2008
5-hydroxytryptamine receptor 2A(HTR2A)	16982285_11	The valvular heart disease (VHD) and pulmonary and retroperitoneal fibrosis seen with long-term use appear to represent a class effect of the ergot-derived DAs that may be related to stimulation of serotonin 5-HT(2B) (and possibly 5-HT(2A)) receptors.	2006
5-hydroxytryptamine receptor 2A(HTR2A)	16614540_1	Lisuride, a dopamine receptor agonist with 5-HT2B receptor antagonist properties: absence of cardiac valvulopathy adverse drug reaction reports supports the concept of a crucial role for 5-HT2B receptor agonism in cardiac valvular fibrosis.	2006
5-hydroxytryptamine receptor 2A(HTR2A)	12600951_9	RESULTS: Polymorphisms in the HTR2A (T102C), beta-globin [hemoglobin (Hb) S, C, and E], and cystic fibrosis (F508del, F508C, I507del, I506V) genes were analyzed.	2003
5-hydroxytryptamine receptor 2A(HTR2A)	12765979_6	METHODS: We studied polymorphisms in the hydroxytryptamine receptor 2A (HTR2A) gene (T102C), beta-globin (hemoglobins S and C) gene, and cystic fibrosis (F508del, F508C, I507del) gene.	2003
5-hydroxytryptamine receptor 2B(HTR2B)	25955005_5	Recent work has focused on several possible mechanisms for valvulopathy, specifically highlighting the serotonin or 5-hydroxy-trypta-mine-2B (5-HT2B) receptor subtype and the 5-HT transporter as mediators that cause expression of myofibroblast phenotype, excessive cell proliferation, leading to valve fibrosis.	2015
5-hydroxytryptamine receptor 2B(HTR2B)	25667920_1	5-HT2B receptor antagonists inhibit fibrosis and protect from RV heart failure.	2015
5-hydroxytryptamine receptor 2B(HTR2B)	25765500_14	However, benzofurans induce 5-HT2B receptor activation associated with heart valve fibrosis.	2015
5-hydroxytryptamine receptor 2B(HTR2B)	26259125_13	Finally, a subendocardial left ventricular fibrosis was induced by chronic serotonin in wild-type mice, which was increased in Htr2B animals, but prevented in Htr2A and Htr2A/2B mice, and could be explained by a contribution of the endothelial 5-HT2BRs to coronary vasodilatation.	2015
5-hydroxytryptamine receptor 2B(HTR2B)	25667920_9	CONCLUSION: 5-HT2B receptor antagonists reduce collagen deposition, thereby inhibiting right ventricular fibrosis.	2015
5-hydroxytryptamine receptor 2B(HTR2B)	24934823_3	The echocardiographic and histological features of the severe valve fibrosis presented by this patient are very similar to those described with 5 HT(2B) receptors agonistic drugs.	2014
5-hydroxytryptamine receptor 2B(HTR2B)	22580238_5	Drugs which have agonist affinity for 5-HT(2B) receptors will probably promote heart valve fibrosis leading to heart failure.	2012
5-hydroxytryptamine receptor 2B(HTR2B)	21518801_5	Pharmacologic inactivation of 5-HT(2B) also effectively prevented the onset of experimental fibrosis and ameliorated established fibrosis.	2011
5-hydroxytryptamine receptor 2B(HTR2B)	21518801_4	Dermal fibrosis was reduced in 5-HT(2B)(-/-) mice using both inducible and genetic models of fibrosis.	2011
5-hydroxytryptamine receptor 2B(HTR2B)	22120177_9	Antagonism of 5-HT(2B) attenuated fibrogenesis and improved liver function in disease models in which fibrosis was pre-established and progressive.	2011
5-hydroxytryptamine receptor 2B(HTR2B)	21440001_5	The Fen-Phen episode sparked renewed interest in serotonin-mediated valve disease, and studies led to the identification of the 5-HT(2B) receptor as the likely molecular target leading to heart valve tissue fibrosis.	2011
5-hydroxytryptamine receptor 2B(HTR2B)	19570945_4	We have shown that activation of 5-HT(2B) receptors on human heart valve interstitial cells in vitro induces a proliferative response reminiscent of the fibrosis that typifies VHD.	2009
5-hydroxytryptamine receptor 2B(HTR2B)	18321937_7	Blockage of 5-HT2A receptors by ketanserin and 5-HT2B receptors by SB215505 reduced bleomycin-induced lung fibrosis, as demonstrated by reduced lung collagen content and reduced procollagen 1 and procollagen 3 mRNA expression.	2008
5-hydroxytryptamine receptor 2B(HTR2B)	18362307_9	CONCLUSIONS: Our present case suggests that constrictive pericarditis may develop even on low-dose cabergoline, which might indicate that this reaction, as opposed to valvular fibrosis, is not mediated by a 5-HT(2B) agonistic mechanism.	2008
5-hydroxytryptamine receptor 2B(HTR2B)	18321937_9	Interestingly, the 5-HT2B receptor was strongly expressed by fibroblasts in the fibroblastic foci in human idiopathic pulmonary fibrosis samples.	2008
5-hydroxytryptamine receptor 2B(HTR2B)	16982285_11	The valvular heart disease (VHD) and pulmonary and retroperitoneal fibrosis seen with long-term use appear to represent a class effect of the ergot-derived DAs that may be related to stimulation of serotonin 5-HT(2B) (and possibly 5-HT(2A)) receptors.	2006
5-hydroxytryptamine receptor 2B(HTR2B)	16614540_1	Lisuride, a dopamine receptor agonist with 5-HT2B receptor antagonist properties: absence of cardiac valvulopathy adverse drug reaction reports supports the concept of a crucial role for 5-HT2B receptor agonism in cardiac valvular fibrosis.	2006
5-hydroxytryptamine receptor 4(HTR4)	20139323_4	The in vivo cardiac function, interstitial fibrosis, and synthesis and secretion of types A (ANP) and B (BNP) natriuretic peptides were monitored in hypertensive models compared with their corresponding sham (Sh2, Sh4).	2010
5-methyltetrahydrofolate-homocysteine methyltransferase reductase(MTRR)	26210777_9	Collectively, our data suggest that MsrA plays a protective role in the progression of UUO-induced kidney fibrosis via suppression of fibrotic responses caused by oxidative stress and inflammation.	2015
5-methyltetrahydrofolate-homocysteine methyltransferase reductase(MTRR)	26210777_8	The UUO-induced elevations in the levels of these oxidative stress markers and leukocyte markers were much higher in the MsrA(-/-) than in the MsrA(+/+) kidneys, the latter suggesting that the exacerbated kidney fibrosis in MsrA(-/-) mice was associated with enhanced inflammatory responses.	2015
5-methyltetrahydrofolate-homocysteine methyltransferase reductase(MTRR)	26210777_5	MsrA deletion increased collagen deposition in the interstitium and the expression of collagen III and \xce\xb1-smooth muscle actin in the UUO kidneys, indicating that MsrA deficiency exacerbated the progression of UUO-induced kidney fibrosis.	2015
5-methyltetrahydrofolate-homocysteine methyltransferase reductase(MTRR)	26210777_4	In this study, we investigated the role of MsrA in unilateral ureteral obstruction (UUO)-induced kidney fibrosis and its underlying mechanisms by using MsrA gene-deleted mice (MsrA(-/-)).	2015
5-methyltetrahydrofolate-homocysteine methyltransferase reductase(MTRR)	20206177_11	Apoptotis and fibrosis were less pronounced in Msr1(-/-)/Cd36(-/-)-transplanted mice, in addition to the protective phenotype of natural antibodies against oxidized low-density lipoprotein in the plasma.	2010
5-methyltetrahydrofolate-homocysteine methyltransferase(MTR)	25504823_13	CONCLUSION: MTR and T2 WSI ratios detect bowel wall fibrosis in a Crohn's disease animal model.	2014
5-methyltetrahydrofolate-homocysteine methyltransferase(MTR)	24930848_6	Furthermore, we show that macromolecular ratio maps based on MT data are more sensitive to cell infiltration and fibrosis than conventional MTR maps.	2014
5-methyltetrahydrofolate-homocysteine methyltransferase(MTR)	24002079_12	The use of MTR resulted in an area under the ROC-curve of 0.96, a sensitivity of 88%, and a specificity of 90% for the diagnosis of fibrosis.	2013
5-methyltetrahydrofolate-homocysteine methyltransferase(MTR)	24002079_11	The mean (SD) MTR of the fibrosis was 37.7% (2.7%), which was significantly higher than that of the residual tumor (29.6% [4.2%]; P < 0.001), the normal rectal wall (30.3% [4.7%]; P = 0.003), and the edematous rectal wall (18.2% [4.0%]; P < 0.001).	2013
5-methyltetrahydrofolate-homocysteine methyltransferase(MTR)	24002079_3	The aim of this study was to evaluate whether the magnetization transfer ratio (MTR) may be used to identify fibrosis in patients with rectal cancer treated with chemoradiotherapy.	2013
5-methyltetrahydrofolate-homocysteine methyltransferase(MTR)	22213176_6	MTR measurements were well correlated to quantitative fibrosis levels (r=0.69, P=0.01).	2012
5-methyltetrahydrofolate-homocysteine methyltransferase(MTR)	22213176_3	For each of 28 pancreatic ductal adenocarcinoma xenografts, MT ratios (MTRs) were calculated and compared to histologic fibrosis levels from reference standard trichrome staining.	2012
6-phosphofructo-2-kinase/fructose-2,6-biphosphatase 3(PFKFB3)	26284610_10	Inhibition of glycolysis by the PFKFB3 inhibitor 3PO or genomic disruption of the PFKFB3 gene blunted the differentiation of lung fibroblasts into myofibroblasts, and attenuated profibrotic phenotypes in myofibroblasts isolated from the lungs of patients with idiopathic pulmonary fibrosis.	2015
6-phosphofructo-2-kinase/fructose-2,6-biphosphatase 3(PFKFB3)	15331593_13	The present study shows that cardiac overexpression of kinase-deficient PFK-2 reduces cardiac glycolysis that produced negative consequences to the heart including hypertrophy, fibrosis, and reduced cardiomyocyte function.	2004
6-pyruvoyltetrahydropterin synthase(PTS)	26209905_14	These observations are in keeping with the majority of previous studies including 6 single case reports and 10 SSc series (from 5 to 43 pts), which frequently reported the beneficial effects of RTX on some SSc manifestations, particularly cutaneous sclerosis, along with the improvement/stabilization of lung fibrosis.	2015
6-pyruvoyltetrahydropterin synthase(PTS)	26519687_3	METHODS AND RESULTS: Comparative histology, electron microscopy, morphometry for cell volume composition and myocardial fibrosis, reactive oxygen species (ROS), polymerase chain reaction for cardiotropic viruses, immunohistochemistry for nitrotyrosine, inducible nitric oxide synthase (iNOS), 8-hydroxydeoxyguanosine (8-OH-dG) and proteomics have been evaluated in endomyocardial biopsies from 9 pat…	2015
6-pyruvoyltetrahydropterin synthase(PTS)	25260760_6	Little toxicity was described 1 year after the completion of RT: 7 pts (12%): grade 1-2 pain, 3 (5%) presented grade 1 fibrosis, and 2 pts (4%) - telangiectasia.	2014
6-pyruvoyltetrahydropterin synthase(PTS)	23754936_2	BACKGROUND: Cystic fibrosis (CF) is a disease that requires intensive multidisciplinary care, including care by physical therapists (PTs).	2013
6-pyruvoyltetrahydropterin synthase(PTS)	22278047_9	Reduction of IL-6 induced MCP-1 has been linked to vein wall fibrosis, promoting post thrombotic syndrome (PTS) and recurrent DVT in patients.	2012
6-pyruvoyltetrahydropterin synthase(PTS)	21487941_8	RESULTS: Most studies agree that a high NT-proBNP level indicates cardiac dysfunction in different systemic diseases such as thalassemia and cystic fibrosis or in pts after chemotherapy.	2011
6-pyruvoyltetrahydropterin synthase(PTS)	21131172_3	It is estimated that a maximum of 60% of patients diagnosed with DVT develop PTS, which is characterized by extensive perivenous and mural fibrosis.	2010
6-pyruvoyltetrahydropterin synthase(PTS)	19581010_12	Endomyocardial biopsy (2 pts) showed abnormal thick endocardium, interstitial fibrosis, myocardial damage and lymphocyte infiltration.	2009
6-pyruvoyltetrahydropterin synthase(PTS)	9674466_2	OBJECTIVE: The aim of the present study was to investigate the efficacy of two frequently used physiotherapies (PTs) for the removal of bronchial secretions in cystic fibrosis (CF) lung disease: autogenic drainage (AD) and the Flutter (Desitin in Germany).	1998
6-pyruvoyltetrahydropterin synthase(PTS)	25851209_11	Dominant pericellular type of fibrosis was equally distributed between the two groups (group A = 9 25 pts, 36%; group B = 10 20 pts, 50%), whereas a perivascular and/or focal replacement fibrosis was more frequent in group A (group A = 10 20 pts, 50%; group B = 2 20 pts, 10%; p = .05, OR 5.55 at univariate analysis).	1996
6-pyruvoyltetrahydropterin synthase(PTS)	1838248_14	It is concluded that 1) macroscopic and microscopic hypertrophy is more marked in the failing than in the non-failing left ventricle, 2) left ventricular pump function is not related to percent interstitial fibrosis, and 3) at an intermediate time after aortic valve replacement pts with previously failing left ventricle show considerable improvement of ejection performance, but residual hypertrop…	1991
6-pyruvoyltetrahydropterin synthase(PTS)	3830709_5	In 17 of the 29 pts not controlled by this regimen, the dosage of A was increased to 6000-8000 mg week-1; short-term control of VT was achieved in 9/17 (53%) pts, but over a long-term follow-up 5/9 (56%) died and severe side-effects (11% pulmonary fibrosis and 11% hepatitis) occurred in 22%.	1985
7-dehydrocholesterol reductase(DHCR7)	23730842_10	By multivariate logistic regression analysis, severe fibrosis was independently associated with older age (OR, 1.056; 95% CI, 1.023-1.089, P = 0.001), low cholesterol (OR, 0.984; 95% CI, 0.974-0.994, P = 0.002), high triglycerides (OR, 1.008; 95% CI, 1.002-1.015, P = 0.01), low 25(OH)D (OR, 0.958; 95% CI, 0.919-0.999, P = 0.04), DHCR7 GG genotype (OR, 4.222; 95% CI, 1.106-16.120; P = 0.03), moder…	2013
7-dehydrocholesterol reductase(DHCR7)	23730842_12	In patients with G1CHC, GG homozygosis for DHCR7 gene and lower 25(OH)D levels are independently associated with the severity of liver fibrosis.	2013
7-dehydrocholesterol reductase(DHCR7)	23730842_9	Interestingly, 53.8% (7/13) of patients with DHCR7 GG genotype had severe liver fibrosis, compared to 27.1% (67/247) of those with DHCR7 TT/TG genotype (P = 0.03).	2013
7-dehydrocholesterol reductase(DHCR7)	23730842_8	DHCR7 GG genotype (P = 0.003) and the severity of fibrosis (P = 0.03) were independent factors associated with lower 25(OH)D serum levels in multiple linear regression analysis.	2013
7-dehydrocholesterol reductase(DHCR7)	22576297_13	Although the susceptible DHCR7 genotype confers small risk, we speculate that the observed stiffness differences indicate a stronger influence of 25(OH)-vitamin D on initiation rather than progression of hepatic fibrosis.	2012
7-dehydrocholesterol reductase(DHCR7)	21536502_3	BACKGROUND: This review evaluated research concerning communication and information about reproductive and sexual health (RSH) in cystic fibrosis (CF).	2011
7-dehydrocholesterol reductase(DHCR7)	9176278_14	Similarly, the increase in perivascular fibrosis was greatest in AB, and there was no difference among AB-Los, S, and S-Los.	1997
8-oxoguanine DNA glycosylase(OGG1)	26370974_5	We focus on the emerging role for AEC mtDNA damage repair by 8-oxoguanine DNA glycosylase (OGG1) and mitochondrial aconitase (ACO-2) in maintaining mtDNA integrity which is important in preventing AEC apoptosis and asbestos-induced pulmonary fibrosis in a murine model.	2015
8-oxoguanine DNA glycosylase(OGG1)	24918270_5	We reasoned that OGG1 deficiency augments asbestos-induced pulmonary fibrosis.	2014
8-oxoguanine DNA glycosylase(OGG1)	24918270_7	Compared with WT mice, Ogg1 homozygous knockout (Ogg1(-/-)) mice exhibit increased pulmonary fibrosis after crocidolite exposure and apoptosis in cells at the bronchoalveolar duct junctions as assessed via cleaved caspase-3 immunostaining.	2014
8-oxoguanine DNA glycosylase(OGG1)	24918270_10	These findings suggest an important role for AEC mtDNA integrity maintained by OGG1 in the pathogenesis of pulmonary fibrosis that may represent a novel therapeutic target.	2014
8-oxoguanine DNA glycosylase(OGG1)	23454624_6	Cyp2E1 and hOGG1 variants were independently associated with a significantly higher fibrosis score in CHBV group.	2013
8-oxoguanine DNA glycosylase(OGG1)	21873502_9	The principle benefit of OGG1 overexpression was a significant decrease in TAC-induced cardiac fibrosis.	2011
8-oxoguanine DNA glycosylase(OGG1)	19291074_6	These findings are discussed in terms of possible roles for mutM, mutY, and mutT in contributing to survival and mutagenesis of P. aeruginosa colonizing the airways of cystic fibrosis patients.	2009
abhydrolase domain containing 5(ABHD5)	25751639_6	Although the intracardiomyocellular lipid deposition results in cardiac ventricular fibrosis and systolic dysfunction, muscle-specific CGI-58 knockout mice show increased glucose uptake in heart and soleus muscle, improved insulin signaling in insulin-sensitive tissues, and reduced plasma concentrations of glucose, insulin, and cholesterol.	2015
abhydrolase domain containing 5(ABHD5)	23733885_10	In conclusion, CGI-58 deficiency in the liver directly causes not only hepatic steatosis but also steatohepatitis and fibrosis.	2013
ABL proto-oncogene 1, non-receptor tyrosine kinase(ABL1)	25661109_1	Overexpression of inhibitor of DNA-binding 2 attenuates pulmonary fibrosis through regulation of c-Abl and Twist.	2015
ABL proto-oncogene 1, non-receptor tyrosine kinase(ABL1)	25876876_13	These results suggested that TGF-\xce\xb21 and c-Abl individually may prevent the deletion of myofibroblasts from wounds and result in fibrosis.	2015
ABL proto-oncogene 1, non-receptor tyrosine kinase(ABL1)	25876876_5	Cellular Abelson (c-Abl) is known as a TGF-\xce\xb21-modulating molecule in fibrosis.	2015
ABL proto-oncogene 1, non-receptor tyrosine kinase(ABL1)	24501543_2	Myelofibrosis (MF) is a rare chronic BCR-ABL1 (breakpoint cluster region-Abelson murine leukemia viral oncogene homologue 1)-negative myeloproliferative neoplasm characterized by progressive bone marrow fibrosis, inefficient hematopoiesis, and shortened survival.	2014
ABL proto-oncogene 1, non-receptor tyrosine kinase(ABL1)	25527259_11	In conclusion, specific c-Abl gene silencing using siRNA effectively reduced fibrosis-related gene expression.	2014
ABL proto-oncogene 1, non-receptor tyrosine kinase(ABL1)	25527259_5	The effects of selective inhibition of c-Abl using small interfering RNA (siRNA) on dermal fibrosis have not yet been explored.	2014
ABL proto-oncogene 1, non-receptor tyrosine kinase(ABL1)	25527259_1	Attenuation of fibrosis with selective inhibition of c-Abl by siRNA in systemic sclerosis dermal fibroblasts.	2014
ABL proto-oncogene 1, non-receptor tyrosine kinase(ABL1)	23083077_4	We tested the hypothesis that imatinib, a clinically available inhibitor of PDGFR-\xce\xb2, Mast/stem cell growth factor receptor (c-kit) and cAbl, would reduce the severity of dermal fibrosis in a murine model.	2012
ABL proto-oncogene 1, non-receptor tyrosine kinase(ABL1)	22691216_3	An important downstream target of TGF-\xce\xb2 is the Abelson (c-Abl) tyrosine kinase, and its inhibition by imatinib mesylate (Gleevec) attenuates fibrosis in mice.	2012
ABL proto-oncogene 1, non-receptor tyrosine kinase(ABL1)	23083077_3	Several lines of evidence suggest that overactive signaling via the Platelet-derived growth factor receptor-beta (PDGFR-\xce\xb2) and V-abl Abelson murine leukemia viral oncogene homolog 1 (cAbl) may be etiologic factors in the development of radiation-induced fibrosis.	2012
ABL proto-oncogene 1, non-receptor tyrosine kinase(ABL1)	22166509_1	Acquisition of a BCR-ABL1 transcript in a patient with disease progression from MDS with fibrosis to AML with myelodysplasia-related changes.	2011
ABL proto-oncogene 1, non-receptor tyrosine kinase(ABL1)	22166509_4	We report the case of a 66-year-old male patient diagnosed with refractory anemia with excess blasts-2 with fibrosis (MDS RAEB-2-F) with a normal karyotype and negative findings for both BCR-ABL1 transcript and JAK2 V617F mutations.	2011
ABL proto-oncogene 1, non-receptor tyrosine kinase(ABL1)	19151753_8	Lesional skin fibroblasts in mice with bleomycin-induced fibrosis of skin displayed evidence of c-Abl activation in situ, and elevated phospho-c-Abl correlated with increased local expression of Egr-1.	2009
ABL proto-oncogene 1, non-receptor tyrosine kinase(ABL1)	19116940_9	CONCLUSION: These results indicate that combined inhibition of the tyrosine kinase c-Abl and PDGF receptor might be effective in the later, less inflammatory stages of SSc and for the treatment of established fibrosis.	2009
ABL proto-oncogene 1, non-receptor tyrosine kinase(ABL1)	19151753_10	Furthermore, the findings show in situ activation of c-Abl paralleling the upregulated tissue expression of Egr-1 that accompanies fibrosis.	2009
ABL proto-oncogene 1, non-receptor tyrosine kinase(ABL1)	19289603_12	Imatinib therapy for DMD may hold promise for ameliorating muscle necrosis, inflammation, and fibrosis by inhibiting c-abl and PDGFR signaling pathways and downstream inflammatory cytokine and fibrotic gene expression.	2009
ABL proto-oncogene 1, non-receptor tyrosine kinase(ABL1)	18326784_1	Dual inhibition of c-abl and PDGF receptor signaling by dasatinib and nilotinib for the treatment of dermal fibrosis.	2008
ABL proto-oncogene 1, non-receptor tyrosine kinase(ABL1)	15629889_11	Inhibition of c-abl activity with imatinib mesylate ameliorates experimental renal fibrosis in rats.	2005
ABO blood group (transferase A, alpha 1-3-N-acetylgalactosaminyltransferase; transferase B, alpha 1-3-galactosyltransferase)(ABO)	25197305_1	Sampling bias, sample size, ordinal regression model, and competing risk in evaluating association between ABO blood group and severity of liver fibrosis in Hepatitis C virus patients.	2014
ABO blood group (transferase A, alpha 1-3-N-acetylgalactosaminyltransferase; transferase B, alpha 1-3-galactosyltransferase)(ABO)	24470446_7	In the ABO-C cases, C4d positivity in late biopsy samples (\xe2\x89\xa530 days after transplantation) was associated with stage 2 or higher fibrosis (METAVIR score; P\xe2\x80\x89=\xe2\x80\x890.01) and with the presence of donor-specific anti-human leukocyte antigen DR antibodies (HLA-DR DSAs) with a mean fluorescence intensity\xe2\x80\x89>\xe2\x80\x895000 according to the Luminex single-antigen b…	2014
ABO blood group (transferase A, alpha 1-3-N-acetylgalactosaminyltransferase; transferase B, alpha 1-3-galactosyltransferase)(ABO)	24470446_10	Among ABO-I patients, C4d positivity was not associated with allograft dysfunction or fibrosis.	2014
ABO blood group (transferase A, alpha 1-3-N-acetylgalactosaminyltransferase; transferase B, alpha 1-3-galactosyltransferase)(ABO)	23626613_4	We determined the association between ABO blood groups and the severity of liver fibrosis in HCV patients.	2013
ABO blood group (transferase A, alpha 1-3-N-acetylgalactosaminyltransferase; transferase B, alpha 1-3-galactosyltransferase)(ABO)	16927132_5	The aim of the study was to investigate whether ABO blood type contributes to the severity of fibrosis.	2006
ABO blood group (transferase A, alpha 1-3-N-acetylgalactosaminyltransferase; transferase B, alpha 1-3-galactosyltransferase)(ABO)	16927132_1	Association between ABO blood group and fibrosis severity in chronic hepatitis C infection.	2006
ABO blood group (transferase A, alpha 1-3-N-acetylgalactosaminyltransferase; transferase B, alpha 1-3-galactosyltransferase)(ABO)	15196081_2	A 24-year-old woman with cystic fibrosis underwent bilateral sequential lung transplantation and unintentionally received an ABO incompatible graft (blood type A(1) graft into a type O recipient).	2004
ABO blood group (transferase A, alpha 1-3-N-acetylgalactosaminyltransferase; transferase B, alpha 1-3-galactosyltransferase)(ABO)	2126537_1	Pseudomonas colonization in cystic fibrosis: lack of correlation with secretion of ABO blood group antigens.	1990
ABO blood group (transferase A, alpha 1-3-N-acetylgalactosaminyltransferase; transferase B, alpha 1-3-galactosyltransferase)(ABO)	5704854_1	ABO blood groups in bilharzial hepatic fibrosis.	1968
acetylcholinesterase (Cartwright blood group)(ACHE)	23284946_8	After 3 w of EMS/E, muscle fiber changes, presence of developmental MyHCs, inflammation, fibrosis and affections of nerve axons and AChE production were observed bilaterally in both the soleus and gastrocnemius muscles.	2013
acetylcholinesterase (Cartwright blood group)(ACHE)	18472332_5	Acetylcholinesterase (AChE) staining showed the distribution of cholinergic nerve around fibrosis scaring septa.	2008
acetylcholinesterase (Cartwright blood group)(ACHE)	8811564_5	The mean grade of staining with acetylcholinesterase in the lamina propria of the strictured cystic fibrosis colons was 2.38 +/- 1.25, compared with .93 +/- .93 (P < .055) in bowels from children without cystic fibrosis.	1996
acetylcholinesterase (Cartwright blood group)(ACHE)	1380483_7	DNA samples from the two cell lines including chromosome 7 and the ACHE gene were positive with PCR primers informative for the human cystic fibrosis CFTR gene, known to reside at the 7q31.1 position, but negative for the ACHE-related butyrylcholinesterase (BCHE, acylcholine acylhydrolase, E.C.	1992
acetylcholinesterase (Cartwright blood group)(ACHE)	156609_3	The proportions of both saturated and polyunsaturated fatty acids were measured in the erythrocytes in Cystic Fibrosis (CF) patients along with two membrane bound enzymes ATPase and acetylcholinesterase.	1979
acetylcholinesterase (Cartwright blood group)(ACHE)	156609_1	A study of erythrocyte fatty acids, adenosinetriphosphatase and acetylcholinesterase in cystic fibrosis.	1979
acetyl-CoA acetyltransferase 1(ACAT1)	24657401_10	CONCLUSIONS: ACAT1 deficiency exaggerates liver fibrosis mainly through enhanced FC accumulation in HSCs.	2014
acetyl-CoA acetyltransferase 1(ACAT1)	24657401_11	Regulation of ACAT1 activities in HSCs could be a target for treatment of liver fibrosis.	2014
acetyl-CoA acetyltransferase 1(ACAT1)	24657401_7	ACAT1 deficiency significantly exaggerated liver fibrosis in the mouse models of liver fibrosis, without affecting the degree of hepatocellular injury or liver inflammation, including hepatocyte apoptosis or Kupffer cell activation.	2014
acetyl-CoA acetyltransferase 1(ACAT1)	24657401_4	In this study, we aimed to define the role of ACAT1 in the pathogenesis of liver fibrosis.	2014
acetyl-CoA acetyltransferase 1(ACAT1)	24657401_5	METHODS: ACAT1-deficient and wild-type mice, or Toll-like receptor 4 (TLR4)(-/-)ACAT1(+/+) and TLR4(-/-)ACAT1(-/-) mice were subjected to bile duct ligation (BDL) for 3 weeks or were given carbon tetrachloride (CCl4) for 4 weeks to induce liver fibrosis.	2014
acetyl-CoA acetyltransferase 1(ACAT1)	24657401_9	Exacerbation of liver fibrosis by ACAT1 deficiency was dependent on FC accumulation-induced enhancement of TLR4 signaling.	2014
acetyl-CoA acetyltransferase 1(ACAT1)	24657401_3	We recently found that FC accumulation in hepatic stellate cells (HSCs) plays a role in progression of liver fibrosis, but the effect of ACAT1 on liver fibrosis has not been clarified.	2014
acetyl-CoA acyltransferase 1(ACAA1)	25771146_11	Examination of leaflets at necropsy confirmed a lower level of mineralization and fibrosis along with higher levels of CAXII in mice under 2-thioUTP.	2015
acetyl-CoA carboxylase beta(ACACB)	22730442_9	Furthermore, ACC2H-/--TAC demonstrated an attenuation of cardiac hypertrophy with a significant reduction in fibrosis relative to CON-TAC.	2012
achaete-scute family bHLH transcription factor 1(ASCL1)	25380300_3	It was shown that ASH1 and EZH2 methyltransferases are involved in development of liver fibrosis; however, their role in the resolution phase of liver fibrosis has not been investigated.	2014
achaete-scute family bHLH transcription factor 1(ASCL1)	25380300_1	Mutant MMP-9 and HGF gene transfer enhance resolution of CCl4-induced liver fibrosis in rats: role of ASH1 and EZH2 methyltransferases repression.	2014
achaete-scute family bHLH transcription factor 1(ASCL1)	25380300_13	Future studies should evaluate the role of selective pharmacologic inhibitors of ASH1 and EZH2 in resolution of liver fibrosis.	2014
achaete-scute family bHLH transcription factor 1(ASCL1)	25380300_4	This study evaluated the role of ASH1 and EZH2 in two mechanistically different therapeutic modalities, HGF and mMMP-9 gene transfer in CCl4 induced rat liver fibrosis.	2014
acid phosphatase 2, lysosomal(ACP2)	2336924_5	Histochemical and enzyme abnormalities observed in experimental rabbits reflect the post-ligation degenerative and reactive processes in both exocrine and endocrine pancreas: (1) the decrease in Krebs cycle and pentose pathway linked EA and the increased lysosomal and acid phosphatase EA reflect early (day 5) degeneration and necrosis of islets and acini (day 30); (2) proliferative processes in d…	1990
acid sensing ion channel subunit 1(ASIC1)	26562527_7	These data indicate that ASIC1a plays an important role in diabetes complication liver fibrosis.	2015
acid sensing ion channel subunit 1(ASIC1)	26562527_1	Effect of acid-sensing ion channel 1a on the process of liver fibrosis under hyperglycemia.	2015
acid sensing ion channel subunit 1(ASIC1)	26562527_3	This study was to investigate the effects of Acid-sensing ion Channel 1a (ASIC1a) on the process of liver fibrosis under hyperglycemia.	2015
acid sensing ion channel subunit 1(ASIC1)	24939363_5	Furthermore, the expression of ASIC1a was increased in primary HSCs and liver tissues of CCl4-treated rats, suggesting that ASIC1a may play certain role in liver fibrosis.	2014
acid sensing ion channel subunit 1(ASIC1)	24939363_9	Collectively, our studies identified that ASIC1a was expressed in rat liver and HSCs and provided a strong evidence for the involvement of the ASIC1a in the progression of hepatic fibrosis.	2014
acid sensing ion channel subunit 1(ASIC1)	24737704_9	In summary, amiloride inhibits hepatic fibrosis in vivo and in vitro, which is probably associated with the downregulation of ASICs.	2014
acid sensing ion channel subunit 1(ASIC1)	24737704_1	Inhibition of ASICs reduces rat hepatic stellate cells activity and liver fibrosis: an in vitro and in vivo study.	2014
acid sensing ion channel subunit 1(ASIC1)	21127383_8	Although ischemia was transient, severe cardiac fibrosis was found in Asic3(-/-) but not in Asic3(+/+) mice littermates.	2010
acid sensing ion channel subunit 1(ASIC1)	17012229_4	However, whether ASIC3 is expressed in the apical membranes of lung epithelial cells and whether it regulates cystic fibrosis transmembrane conductance regulator (CFTR) function are not known at the present time.	2006
acid sensing ion channel subunit 1(ASIC1)	17012229_13	Because acidic luminal fluid in the cystic fibrosis airway and lung tends to stimulate ASIC3 channel expression and activity, the interaction of ASIC3 and CFTR may contribute to defective salt and fluid transepithelial transport in the cystic fibrotic pulmonary system.	2006
acid sensing ion channel subunit 1(ASIC1)	11748227_1	Up-regulation of acid-gated Na(+) channels (ASICs) by cystic fibrosis transmembrane conductance regulator co-expression in Xenopus oocytes.	2001
acid sensing ion channel subunit 3(ASIC3)	21127383_8	Although ischemia was transient, severe cardiac fibrosis was found in Asic3(-/-) but not in Asic3(+/+) mice littermates.	2010
acid sensing ion channel subunit 3(ASIC3)	17012229_4	However, whether ASIC3 is expressed in the apical membranes of lung epithelial cells and whether it regulates cystic fibrosis transmembrane conductance regulator (CFTR) function are not known at the present time.	2006
acid sensing ion channel subunit 3(ASIC3)	17012229_13	Because acidic luminal fluid in the cystic fibrosis airway and lung tends to stimulate ASIC3 channel expression and activity, the interaction of ASIC3 and CFTR may contribute to defective salt and fluid transepithelial transport in the cystic fibrotic pulmonary system.	2006
acireductone dioxygenase 1(ADI1)	23555784_2	BACKGROUND AND OBJECTIVES: Impaired renal function in atherosclerotic renovascular disease (ARD) may be the result of crosstalk between atherosclerotic renovascular stenosis and amplified oxidative stress, inflammation and fibrosis.	2013
acireductone dioxygenase 1(ADI1)	11085963_6	alpha- and ss-receptor density (ARD and BRD) and extent of fibrosis were quantified from the myocardial biopsies.	2000
acireductone dioxygenase 1(ADI1)	11085963_11	No significant relation between either ARD or BRD and percent myocardial fibrosis was noted (r=0.37 and -0.39, respectively).	2000
acireductone dioxygenase 1(ADI1)	4052358_8	However, ARD following complicated cataract surgery is more likely to suffer from periretinal fibrosis.	1985
acireductone dioxygenase 1(ADI1)	6161575_1	Pulmonary fibrosis in experimental acute respiratory disease.	1981
aconitase 2(ACO2)	26370974_5	We focus on the emerging role for AEC mtDNA damage repair by 8-oxoguanine DNA glycosylase (OGG1) and mitochondrial aconitase (ACO-2) in maintaining mtDNA integrity which is important in preventing AEC apoptosis and asbestos-induced pulmonary fibrosis in a murine model.	2015
aconitase 2(ACO2)	23431404_7	RESULTS: Our data revealed that smoke exposure enlarged ventricular end systolic and diastolic diameters, reduced myocardial and cardiomyocyte contractile function, disrupted intracellular Ca(2+) homeostasis, facilitated fibrosis, apoptosis and mitochondrial damage (cytochrome C release and aconitase activity), the effects of which were attenuated or mitigated by metallothionein.	2013
acrosin binding protein(ACRBP)	15708899_6	Patients with systemic sclerosis had limited cutaneous disease (29), digital ulcers (14), pulmonary arterial hypertension (PAH) (10), pulmonary fibrosis on CT (23), positive anti-Scl70 (14), and anti-centromere antibodies (10).	2005
acrosin(ACR)	26034358_8	The primary endpoint was SVR; secondary endpoints examined include (1) patient and graft survival; (2) effect of anti-viral therapy on liver histology (fibrosis and inflammation); (3) incidence of on-treatment development of ACR, CDR, or PCH; (4) association of recipient and donor IL28B genotype with SVR; and (5) incidence of anti-viral therapy-associated adverse events (anemia, leukopenia, throm…	2015
acrosin(ACR)	25655067_2	Tubulointerstitial fibrosis is common with ageing and strongly prognostic for ESRD but is poorly captured by eGFR or urine albumin to creatinine ratio (ACR).	2015
acrosin(ACR)	25981858_7	In 19 patients without a history of ACR, fibrosis was found in 9 patients (47%).	2015
acrosin(ACR)	25981858_6	RESULTS: Among 14 patients with ACR, a history fibrosis was found in 8 patients (57%).	2015
acrosin(ACR)	25981858_11	CONCLUSIONS: We suggest that there is a correlation between ACR and development of graft fibrosis present in liver grafts from recipients with normal liver biochemistry.	2015
acrosin(ACR)	25022339_9	In similarly adjusted models, log(ACR) was related to kidney volume (\xce\x94R\xc2\xb2=0.02; P<0.001) and fibrosis volume percentage (\xce\x94R\xc2\xb2=0.03; P<0.001).	2014
acrosin(ACR)	23408392_12	We demonstrate specific miRNA expression signatures that discriminate the rates of fibrosis progression in patients with recurrent HCV, and we distinguish recurrent HCV from ACR after LT. A pathway analysis indicates that specific miRNAs may play a regulatory role in these processes.	2013
acrosin(ACR)	23408392_6	These cohorts consisted of patients with slow HCV fibrosis progression (Ishak stage\xe2\x80\x89<\xe2\x80\x89F2), fast HCV fibrosis progression (Ishak stage\xe2\x80\x89\xe2\x89\xa5\xe2\x80\x89F2), ACR, and nonviral etiologies.	2013
acrosin(ACR)	23260706_17	DSAs are prevalent in the cystic fibrosis population and are associated with AMR, bronchiolitis obliterans syndrome, and possibly, ACR.	2012
acrosin(ACR)	22974463_11	Reversal of ACR, however, resulted in early stage graft fibrosis.	2012
acrosin(ACR)	23253020_8	Histopathological parameters such as edema, congestion, inflammatory cells, microvascular proliferation, fibrosis, eosinophils, mast cells and epithelial damage were all higher in the ACR-treated group than in the controls.	2012
acrosin(ACR)	22650645_4	The aim of our study was to elucidate the role of MBL-2 genotypes after liver transplantation (LT) for hepatitis C virus (HCV)-induced liver disease regarding the incidence of acute cellular rejection (ACR), graft inflammation, fibrosis development, and antiviral treatment response.	2012
acrosin(ACR)	22989351_10	CONCLUSION: Fibrosis progression and ACR-incidence after transplantation for HCV-induced liver disease seem to be under genetic control.	2012
acrosin(ACR)	22989351_5	The results were correlated with 616 post-transplant graft biopsies regarding inflammation, fibrosis and evidence for ACR.	2012
acrosin(ACR)	22989351_3	The aim of our study was to determine the prevalence of YKL-40-gene polymorphism in hepatitis C virus (HCV)-positive patients and its impact on the incidence of acute cellular rejection (ACR), graft fibrosis and antiviral treatment response.	2012
acrosin(ACR)	23008132_7	Although negative effects from this are difficult to predict, they could include an accelerated progression of fibrosis in patients with failed HCV eradication and an increase in ACR in non-HCV patients.	2012
acrosin(ACR)	21993182_13	CONCLUSIONS: ACR resulting in SOS and associated with significant perivenular fibrosis, central venulitis and congestion may be the cause of ascites post-LT and may portend a poor prognosis for recovery.	2011
acrosin(ACR)	21031544_10	The rates of severe HCV recurrence (retransplantation or death due to recurrent hepatitis C and/or the development of stage 4/6 fibrosis or worse within 2 years) were similar [3 DCD patients (8%) versus 11 DBD patients (15%), P = 0.38], and cytomegalovirus infection (hazard ratio = 7.9, P = 0.002, 95% confidence interval = 2.1-28.9) and ACR (hazard ratio = 6.2, P = 0.002, 95% confidence interval …	2010
acrosin(ACR)	25013557_4	OBJECTIVES: To evaluate the efficacy of IL-2RA (Basiliximab) in preventing acute cellular rejection (ACR) in patients with recurrent HCV infection after OLT and to assess the impact of IL-2RA in promoting fibrosis progression in post-OLT recurrent HCV infection.	2010
acrosin(ACR)	25013557_13	Univariate analysis revealed that a higher HCV RNA load at 4 months post-OLT (p=0.002), cytomegalovirus (CMV) infection (p<0.001), use of steroid therapy for ACR (p=0.043), and use of IL-2RA (p<0.001) were associated with higher hazards for the progression of fibrosis.	2010
acrosin(ACR)	25013557_16	Steroid therapy for ACR remained significantly (Hazard Ratio=2.9, p=0.002) associated with the progression of fibrosis.	2010
acrosin(ACR)	19273538_12	CONCLUSIONS: Despite other risk factors for NASH, monitoring for hepatic fibrosis using serial liver function and ACR guidelines tests alone as in RA appears safe in psoriasis and PsA.	2009
acrosin(ACR)	18702895_9	Significant goblet cell and subepithelial gland hyperplasia, subepithelial fibrosis, epithelial thickening, and mononuclear cell infiltration were shown in both models with more severe extent found in the ACRS model.	2008
acrosin(ACR)	18708942_10	All specimens were scored for the following features: (1) CP (mild, moderate, and severe), (2) portal ACR (mild, moderate, and severe), (3) zone 3 fibrosis (mild=perivenular or severe=bridging), and (4) ductopenia.	2008
acrosin(ACR)	18813106_12	CONCLUSIONS: Histologic findings of ACR, lymphocytic bronchiolitis, BOOP, and interstitial pneumonitis were directly associated with the development of interstitial fibrosis and bronchiolitis obliterans.	2008
acrosin(ACR)	18813106_9	The strongest histological correlations were between ACR and lymphocytic bronchiolitis (OR 5.1, P<0.0001) or interstitial fibrosis (OR 3.2, P<0.0001).	2008
acrosin(ACR)	18708942_20	CP is most common in conjunction with portal ACR, where it carries a significant risk for the development of zone 3 fibrosis and a trend toward the development of ductopenic chronic rejection.	2008
acrosin(ACR)	14522768_9	RESULTS: The fibrosis of the anterior capsule was more frequently observed in the group using Corneal ACR6D and AMO SI40NB.	2003
acrosin(ACR)	2031259_3	Therapeutic response (63% overall) was better in pure acute cellular rejections (ACR) (13/15, 87%) than ACR with interstitial fibrosis (4/12, 33%) or with vascular injury (5/8, 62%).	1991
acrosin(ACR)	2031259_4	Intragraft T lymphocytes were more numerous in vascular rejection (mean 566/mm2) compared with pure ACR (mean 265/mm2, P = .049), and macrophages were greater in pure ACR (203/mm2) compared with ACR with interstitial fibrosis (83/mm2, P = .051).	1991
acrosin(ACR)	3307851_3	Glomerular, tubular abnormalities, interstitial cellular infiltrate and fibrosis, peritubular capillary mononuclear cell congestion (PCC), vascular changes and erythrocyte extravasation were evaluated and the following morphologic patterns were identified alone or in combination: acute (AR) and acute on chronic rejection (ACR), toxic tubulopathy (TT), interstitial stripe fibrosis (ISF), CsA-assoc…	1987
actin beta(ACTB)	23904517_9	CONCLUSION: Free \xce\xb2-actin within the lungs of sarcoidosis patients potentially may contribute to disease pathogenesis particularly in the context of abnormal remodelling and the development of pulmonary fibrosis.	2013
actin beta(ACTB)	23904517_1	Sarcoidosis, alveolar \xce\xb2-actin and pulmonary fibrosis.	2013
actin beta(ACTB)	21613803_5	RESULTS: While tubulointerstitial fibrosis in COL4A3-deficient mice was inhibited by MMF, 19 proteins in the kidneys were regulated: 12 with lower (ATPO, TAGL2, CAH1, TPD52, VA0D1, SERPH, GNAL, PSB6, EF1D, OTUB1, NDUS8, and NAPSA) and 7 with higher (ACADM, ACY3, CK054, ACTB/G, ACTB, UBP5, and ACY1) spot intensity.	2011
actin beta(ACTB)	21527160_7	No changes in LV weight to tibial length ratio, LV fibrosis, and expression of fetal genes (atrial natriuretic factor, \xce\xb1-skeletal muscle actin, and \xce\xb2-myosin heavy chain) and collagens were observed between AC6-On and AC6-Off groups.	2011
actin beta(ACTB)	21073651_8	RESULTS: All genes performed well in the samples of patients with low disease activity, but HPRT1, \xce\xb2-actin, GAPDH and 18S rRNA ranked poorly in samples with severe fibrosis or inflammation.	2010
actin beta(ACTB)	19581512_7	Mice receiving angiotensin II (1.4 mg/kg per day for 12 days) exhibited cardiac hypertrophy, as well as fibrosis, which was associated with elevated myocardial expression of molecular markers of hypertrophy (alpha-skeletal actin, beta-myosin heavy chain, and brain natriuretic peptide) and fibrosis (collagen types I and III and fibronectin), as well as MMP-2 and ADAM-12.	2009
actin beta(ACTB)	19659781_16	Hepatic fibrosis was determined by sirius red staining of liver sections and by assessment of alpha smooth muscle actin expression compared with beta-actin (both by mRNA as well as the protein liver extract western blotting).	2009
actin beta(ACTB)	18502941_11	In phenylephrine-induced cardiac hypertrophy, ang1-256 reduced left ventricle (LV)/tibia ratios, fetal gene expressions (atrial and brain natriuretic peptides, skeletal actin, beta-myosin heavy chain), and fibrosis (collagen III), and increased LV prosurvival signaling (akt, MAPK(p42/44)), and AMPK(T172).	2008
actin beta(ACTB)	8475255_1	Temporal modulation of TGF-beta 1 and beta-actin gene expression in pig skin and muscular fibrosis after ionizing radiation.	1993
actin beta(ACTB)	2051720_3	To evaluate procollagen mRNA levels as an early factor in the development of this form of renal fibrosis, we measured renal procollagen alpha 1 (I), alpha 1 (III), alpha 1 (IV) and beta-actin mRNA levels in rats treated with cyclosporine (CsA) or the olive oil vehicle (OO) for one or four weeks.	1991
actin beta(ACTB)	4043669_9	These findings in the baboon model of alcoholic fibrosis show that ethanol consumption increases type I procollagen mRNA, which may foster fibrogenesis; increases albumin mRNA content without causing an increase in serum albumin; and induces no change in levels of beta-actin mRNA.	1985
actin gamma 1(ACTG1)	23904517_1	Sarcoidosis, alveolar \xce\xb2-actin and pulmonary fibrosis.	2013
actin gamma 1(ACTG1)	23904517_9	CONCLUSION: Free \xce\xb2-actin within the lungs of sarcoidosis patients potentially may contribute to disease pathogenesis particularly in the context of abnormal remodelling and the development of pulmonary fibrosis.	2013
actin gamma 1(ACTG1)	21527160_7	No changes in LV weight to tibial length ratio, LV fibrosis, and expression of fetal genes (atrial natriuretic factor, \xce\xb1-skeletal muscle actin, and \xce\xb2-myosin heavy chain) and collagens were observed between AC6-On and AC6-Off groups.	2011
actin gamma 1(ACTG1)	21073651_8	RESULTS: All genes performed well in the samples of patients with low disease activity, but HPRT1, \xce\xb2-actin, GAPDH and 18S rRNA ranked poorly in samples with severe fibrosis or inflammation.	2010
actin gamma 1(ACTG1)	19581512_7	Mice receiving angiotensin II (1.4 mg/kg per day for 12 days) exhibited cardiac hypertrophy, as well as fibrosis, which was associated with elevated myocardial expression of molecular markers of hypertrophy (alpha-skeletal actin, beta-myosin heavy chain, and brain natriuretic peptide) and fibrosis (collagen types I and III and fibronectin), as well as MMP-2 and ADAM-12.	2009
actin gamma 1(ACTG1)	19659781_16	Hepatic fibrosis was determined by sirius red staining of liver sections and by assessment of alpha smooth muscle actin expression compared with beta-actin (both by mRNA as well as the protein liver extract western blotting).	2009
actin gamma 1(ACTG1)	18502941_11	In phenylephrine-induced cardiac hypertrophy, ang1-256 reduced left ventricle (LV)/tibia ratios, fetal gene expressions (atrial and brain natriuretic peptides, skeletal actin, beta-myosin heavy chain), and fibrosis (collagen III), and increased LV prosurvival signaling (akt, MAPK(p42/44)), and AMPK(T172).	2008
actin gamma 1(ACTG1)	8475255_1	Temporal modulation of TGF-beta 1 and beta-actin gene expression in pig skin and muscular fibrosis after ionizing radiation.	1993
actin gamma 1(ACTG1)	2051720_3	To evaluate procollagen mRNA levels as an early factor in the development of this form of renal fibrosis, we measured renal procollagen alpha 1 (I), alpha 1 (III), alpha 1 (IV) and beta-actin mRNA levels in rats treated with cyclosporine (CsA) or the olive oil vehicle (OO) for one or four weeks.	1991
actin gamma 1(ACTG1)	4043669_9	These findings in the baboon model of alcoholic fibrosis show that ethanol consumption increases type I procollagen mRNA, which may foster fibrogenesis; increases albumin mRNA content without causing an increase in serum albumin; and induces no change in levels of beta-actin mRNA.	1985
actin, alpha 1, skeletal muscle(ACTA1)	25196308_5	In the injured cornea the absence of PPM1A led to enhanced inflammatory response, stromal keratocyte transactivation, fibrosis, increased p38 mitogen-activated protein kinase phosphorylation, elevated expression of transforming growth factor-\xce\xb2-related genes (including Acta2, TGF-\xce\xb2, Col1, MMP9, and VEGF) and subsequently to neovascularization.	2014
actin, alpha 1, skeletal muscle(ACTA1)	24204629_14	mRNA array revealed downregulation of genes specific to fibrosis (Tgf-\xce\xb2, Il-1\xce\xb2, Pdgfb), matrix (Acta2, Col1a2, Col3a1, Lox, Itgb1/6, Itga2/3) and members of the TGF-\xce\xb2 superfamily (Tgfbr1/2, Smad2/3, Ltbp1, Serpine1, Nfkb/Sp1/Cebpb).	2013
actin, alpha 1, skeletal muscle(ACTA1)	23456624_9	In addition, the expression of fibrosis-related genes aSMA, CTGF, and TGFb2r were down-regulated subsequent to the treatment of TIMP1-siRNA.	2013
actin, alpha 1, skeletal muscle(ACTA1)	23456668_10	Fibroblasts were grown on functionalized and pristine CoCr substrates, and the efficacy of BMP-7 peptide on anti-fibrosis was analyzed via gene expression and protein expression of fibrosis markers ACTA2, Collagen 1A1, and fibronectin.	2013
actin, alpha 1, skeletal muscle(ACTA1)	22398790_10	These findings suggest that in pulmonary fibrosis the molecular mechanism of myofibroblast differentiation is complex and that the difference between ASMA expression and type I collagen expression is mediated by the TGF-\xce\xb2/Smad pathway.	2012
actin, alpha 1, skeletal muscle(ACTA1)	22398790_5	In murine bleomycin-induced pulmonary fibrosis, nuclear localization of phosphorylated Smad2/3 (p-Smad2/3) was observed in pulmonary fibrotic lesions 7 days after bleomycin injection, whereas \xce\xb1-smooth muscle actin (ASMA)-positive myofibroblasts appeared in the lesions at 14 days, when the cytoplasmic localization of p-Smad2/3 was observed.	2012
actin, alpha 1, skeletal muscle(ACTA1)	22363627_4	Treatment with AA significantly attenuated CCl(4)-induced liver fibrosis and functional impairment in a dosage-dependent manner, including blockade of the activation of HSC as determined by inhibiting de novo alpha smooth muscle actin (a-SMA) and collagen matrix expression, and an increase in ALT and AST (all p<0.01).	2012
actin, alpha 1, skeletal muscle(ACTA1)	21510802_7	RESULTS: The following genes were significantly upregulated (p\xe2\x80\x89<\xe2\x80\x890.05) in lymphedema but not in GO and have functions in wound healing, fibrosis, fat metabolism, inflammation, differentiation, development, adhesion, and the cytoskeleton: ATP-binding cassette, sub-family G (WHITE), member 1 (ABCG1), actin, alpha 2, smooth muscle, aorta (ACTA2), secreted frizzled-related prote…	2011
actin, alpha 1, skeletal muscle(ACTA1)	18203815_11	Finally, we demonstrated that systemic administration of CSD peptide to bleomycin-treated mice blocks epithelial cell apoptosis, inflammatory cell infiltration, and changes in tissue morphology as well as signaling molecule activation and collagen, tenascin-C, and ASMA expression associated with lung fibrosis.	2008
actin, alpha 1, skeletal muscle(ACTA1)	18203815_2	Lung fibrosis involves the overexpression of ECM proteins, primarily collagen, by alpha-smooth muscle actin (ASMA)-positive cells.	2008
actin, alpha 1, skeletal muscle(ACTA1)	18203815_12	CSD peptide may be a prototype for novel treatments for human lung fibrosis that act, in part, by inhibiting the expression of ASMA and ECM proteins.	2008
actin, alpha 1, skeletal muscle(ACTA1)	17557942_4	Henares, Spain, 1606) has been taken by many as a direct reference to cystic fibrosis [Busch R. Acta Univ Carol Med (Praha) 36: 13-15, 1990].	2007
actin, alpha 1, skeletal muscle(ACTA1)	17306384_4	Acta 1173 (2007) 192-200) recent study documents the effect of N-WASP inhibition and actin cytoskeleton disruption on the constitutive internalization and recycling of the cystic fibrosis transmembrane conductance regulator (CFTR) channel.	2007
actin, alpha 1, skeletal muscle(ACTA1)	17274978_4	To elucidate the inhibitory mechanism of ALK5 inhibitor on pulmonary fibrosis in vivo, we performed the histopathological assessment, gene expression analysis of extracellular matrix (ECM) genes and immunohistochemistry including receptor-activated Smads (R-Smads; Smad2/3), CTGF, myofibroblast marker (alpha-smooth muscle actin; aSMA) and type I collagen deposition in the lung using Bleomycin (BLM…	2007
actin, alpha 1, skeletal muscle(ACTA1)	16268816_11	ASMA positive patients had significantly higher globulin levels (P=0.036) and a trend towards more bridging fibrosis or cirrhosis.	2005
actin, alpha 1, skeletal muscle(ACTA1)	15479692_10	After seven weeks of CCl4, treatment with SSR182289 resulted in a significant decrease in fibrosis (-30%, p = 0.04) and ASMA positive areas (-35%, p = 0.05).	2004
actin, alpha 1, skeletal muscle(ACTA1)	15479692_6	Fibrosis and the area occupied by alpha smooth muscle actin (ASMA) positive cells were quantified with histomorphometry.	2004
actin, alpha 1, skeletal muscle(ACTA1)	15479692_8	RESULTS: After three weeks of CCl4, treatment with SSR182289 did not significantly decrease the area of fibrosis but significantly decreased the area of ASMA positive cells by 22% (p = 0.03) and the expression of TIMP-1 mRNA by 52% (p = 0.02).	2004
actin, alpha 1, skeletal muscle(ACTA1)	15053929_10	At 69 days there was a florid pericellular fibrosis complemented by strong ASMA immunolabelling, confirming phenotypic modulation of hepatic stellate cells.	2004
actin, alpha 1, skeletal muscle(ACTA1)	15378321_5	Highly differentiated fibroblastic cells, so-called myofibroblasts, express the actin isoform alpha-smooth muscle actin (ASMA) and have been found to play a major role in tissue contraction during wound healing and organ fibrosis.	2004
actin, alpha 1, skeletal muscle(ACTA1)	12691502_4	DESIGN: To examine the serial pathological alterations caused by peritoneal fibrosis, we made an experimental model of peritoneal fibrosis by daily intraperitoneal injection of chlorhexidine gluconate (CG) in rats for 28 days and examined the expression of HSP-47 together with that of types I and III collagen, alpha-smooth muscle actin (aSMA), and ED-1 (a marker for macrophages) using immunohisto…	2003
actin, alpha 1, skeletal muscle(ACTA1)	10549029_7	In conclusion, our study suggests that interstitial a-SMA positive cells play a role in the development of interstitial fibrosis in MCGN-I.	1999
actin, alpha 1, skeletal muscle(ACTA1)	8835746_11	Although direct evidence is lacking, the data suggest that, in cholangiocarcinomas and metastatic liver carcinomas, peritumoral ASMA-positive perisinusoidal cells transform into activated perisinusoidal cells (myofibroblasts), are incorporated into the tumor (intratumoral ASMA-positive stromal cells), and produce extracellular matrix proteins, that lead to tumor fibrosis.	1996
actin, alpha 1, skeletal muscle(ACTA1)	8835746_10	CONCLUSIONS: These findings show that ASMA-positive stromal cells are related to tumor fibrosis in liver malignancies.	1996
actin, alpha 1, skeletal muscle(ACTA1)	8835746_12	The scanty ASMA-positive cells in hepatocellular carcinomas may in part be responsible for the small amount of fibrosis in this tumor.	1996
actin, alpha 1, skeletal muscle(ACTA1)	8835746_3	In this study, we investigated ASMA-positive stromal cells and their relation to tumor fibrosis in 50 cholangiocarcinomas, 30 hepatocellular carcinomas, and 57 metastatic liver carcinomas.	1996
actin, alpha 1, skeletal muscle(ACTA1)	7704328_10	In this immediate postnecrotic fibrosis, ASMA-positive stromal cells of Ito cell origin were distributed irregularly and were closely associated with reticulin and newly-formed collagen fibres.	1995
actin, alpha 1, skeletal muscle(ACTA1)	8319951_7	In addition, ASMA-positive interstitial cells were seen in many biopsy specimens and often were increased in number in biopsy specimens showing early interstitial fibrosis and tubular atrophy.	1993
actin, alpha 1, skeletal muscle(ACTA1)	1890552_8	With the development of hepatic fibrosis, a-smA was expressed only in a portion of desmin-positive cells located predominantly around collagen bundles.	1991
actin, alpha 2, smooth muscle, aorta(ACTA2)	25196308_5	In the injured cornea the absence of PPM1A led to enhanced inflammatory response, stromal keratocyte transactivation, fibrosis, increased p38 mitogen-activated protein kinase phosphorylation, elevated expression of transforming growth factor-\xce\xb2-related genes (including Acta2, TGF-\xce\xb2, Col1, MMP9, and VEGF) and subsequently to neovascularization.	2014
actin, alpha 2, smooth muscle, aorta(ACTA2)	24204629_14	mRNA array revealed downregulation of genes specific to fibrosis (Tgf-\xce\xb2, Il-1\xce\xb2, Pdgfb), matrix (Acta2, Col1a2, Col3a1, Lox, Itgb1/6, Itga2/3) and members of the TGF-\xce\xb2 superfamily (Tgfbr1/2, Smad2/3, Ltbp1, Serpine1, Nfkb/Sp1/Cebpb).	2013
actin, alpha 2, smooth muscle, aorta(ACTA2)	23456668_10	Fibroblasts were grown on functionalized and pristine CoCr substrates, and the efficacy of BMP-7 peptide on anti-fibrosis was analyzed via gene expression and protein expression of fibrosis markers ACTA2, Collagen 1A1, and fibronectin.	2013
actin, alpha 2, smooth muscle, aorta(ACTA2)	21510802_7	RESULTS: The following genes were significantly upregulated (p\xe2\x80\x89<\xe2\x80\x890.05) in lymphedema but not in GO and have functions in wound healing, fibrosis, fat metabolism, inflammation, differentiation, development, adhesion, and the cytoskeleton: ATP-binding cassette, sub-family G (WHITE), member 1 (ABCG1), actin, alpha 2, smooth muscle, aorta (ACTA2), secreted frizzled-related prote…	2011
actinin alpha 1(ACTN1)	25791774_8	Validation by western blot showed increased levels of Alpha-actinin-1 and Moesin in the UUO 1-week group, indicating that they may serve as candidate biomarkers of renal tubular injury, and significantly increased levels of Vimentin, Annexin A1 and Clusterin in the UUO 3-week group, indicating that they may serve as candidate biomarkers of interstitial fibrosis.	2015
actinin alpha 4(ACTN4)	25704355_9	Finally, because fibrosis represents the final common pathway of glomerular damage in FSGS, the experience with a wide range of antifibrotic agents is presented.	2015
actinin alpha 4(ACTN4)	26322947_6	DS expression was evaluated in normal renal tissue and in kidney biopsies obtained from patients with acute interstitial or vascular renal allograft rejection, patients with interstitial fibrosis and tubular atrophy (IF/TA), and from patients with focal segmental glomerulosclerosis (FSGS), membranous glomerulopathy (MGP) or systemic lupus erythematosus (SLE), using our unique specific anti-DS ant…	2015
actinin alpha 4(ACTN4)	25924598_9	RESULTS: Animals that underwent intermittent exposure to ATX treatment exhibited significant improvements in renal functional parameters as well as in glomerular and interstitial fibrosis compared to those undergoing saline treatment in FSGS mouse models.	2015
actinin alpha 4(ACTN4)	26031598_13	A fourth biopsy performed on postoperative day 2540 showed focal segmental glomerulosclerosis collapsing variant lesions with severe interstitial fibrosis and tubular atrophy.	2015
actinin alpha 4(ACTN4)	24700797_8	Maladaptive hemodynamic changes and tissue fibrosis caused by calcineurin inhibitors or other factors may be involved in the pathogenesis of de novo FSGS.	2014
actinin alpha 4(ACTN4)	23760285_10	Thus, insufficient lysosomal degradation in FSGS is not the cause of the inflammation and fibrosis during kidney disease.	2013
actinin alpha 4(ACTN4)	23463342_10	In addition, the serum level of miR-192 was significantly correlated with the degree of interstitial fibrosis in patients with FSGS (r\xe2\x80\x89=\xe2\x80\x890.342, p\xe2\x80\x89<\xe2\x80\x890.05).	2013
actinin alpha 4(ACTN4)	24029259_11	Similarly, tubular atrophy and interstitial fibrosis were significantly lower in MCD than in FSGS.	2013
actinin alpha 4(ACTN4)	23707763_4	In mice, doxorubicin (adriamycin) can cause nephropathy characterized by chronic proteinuria, glomerular damage and interstitial inflammation and fibrosis, as seen in human focal segmental glomerulosclerosis.	2013
actinin alpha 4(ACTN4)	23514668_9	In short, this experiment found that HuMSCs improved kidney fibrosis and modulated the inflammatory response, suggesting that xenogenic transplantation of HuMSCs is a novel approach for improving the progression of FSGS and may be a promising therapeutic intervention in the future.	2013
actinin alpha 4(ACTN4)	22627627_8	CONCLUSION: Apart from the degree of interstitial fibrosis, the serum level of creatinine and its clearance rate are well correlated with the proportions of both segmentally and globally sclerosed glomeruli in primary focal segmental glomerulosclerosis.	2012
actinin alpha 4(ACTN4)	22813949_5	Systolic, diastolic and mean arterial pressures were higher in renal failure rats that were associated with increased serum creatinine, albuminuria and renal injury comprised of blood vessel media hypertrophy, focal and segmental glomerulosclerosis, tubular atrophy and interstitial inflammation and fibrosis.	2012
actinin alpha 4(ACTN4)	21376112_6	Our data suggest that Antroq might be a potential therapeutic agent for FSGS, acting by boosting Nrf2 activation and suppressing NF-\xce\xbaB-dependent inflammatory and TGF-\xce\xb21-mediated fibrosis pathways in the kidney.	2011
actinin alpha 4(ACTN4)	21358326_2	PURPOSE OF REVIEW: HIV-associated nephropathy (HIVAN) is characterized histologically by a collapsing form of focal segmental glomerulosclerosis (FSGS), microcystic tubular dilation, interstitial inflammation and fibrosis.	2011
actinin alpha 4(ACTN4)	21376112_5	We demonstrate that Antroq significantly (1) attenuates proteinuria, renal dysfunction, and glomerulopathy, including epithelial hyperplasia lesions and podocyte injury; (2) reduces oxidative stress, leukocyte infiltration, and expression of fibrosis-related proteins in the kidney; (3) increases renal nuclear factor E2-related factor 2 (Nrf2) and glutathione peroxidase activity; and (4) inhibits …	2011
actinin alpha 4(ACTN4)	21376112_2	Oxidative stress, inflammation, and fibrosis are involved in the development and progression of focal segmental glomerulosclerosis (FSGS), a common form of idiopathic nephrotic syndrome that represents a therapeutic challenge because it has a poor response to steroids.	2011
actinin alpha 4(ACTN4)	21310077_3	Recent basic science advances have led to development of alternative treatments that specifically target aberrant pathways of fibrosis which are relevant to disease progression in FSGS.	2011
actinin alpha 4(ACTN4)	21393868_16	Hypertension, proteinuria, interstitial fibrosis, and FSGS were bad prognosticators.	2011
actinin alpha 4(ACTN4)	20531454_4	These included patients with minimal change disease, membranous nephropathy, lupus nephritis ISN/RPS classes III/IV/V, hypertensive nephrosclerosis, crescentic glomerulonephritis, tubulointerstitial fibrosis, IgA nephropathy, diabetic kidney disease, and FSGS.	2010
actinin alpha 4(ACTN4)	20551626_8	Expression levels of extracellular matrix proteins (collagen I, IV and fibronectin) and alpha-smooth muscle actin were increased in kidneys of RC/FF mice at 20 weeks, and this was accompanied by focal segmental glomerulosclerosis and periglomerular interstitial fibrosis.	2010
actinin alpha 4(ACTN4)	19414944_8	We conclude that we found a correlation of renal insufficiency in primary FSGS patients with interstitial fibrosis, global scars and the synechiae of Bowman's capsule in their biopsies.	2009
actinin alpha 4(ACTN4)	19917783_6	Three biopsies revealed collapsing lesions of FSGS, four had perihilar lesions, and seven showed > or =40% tubular atrophy and interstitial fibrosis.	2009
actinin alpha 4(ACTN4)	19427502_7	Such changes lead to glomerulomegaly, focal segmental glomerulosclerosis, tubulointerstitial inflammation, and fibrosis that characterize the renal damage in obese hypertensive subjects.	2009
actinin alpha 4(ACTN4)	19806361_8	After 1 month, progressive scarring lead to focal segmental glomerulosclerosis with fibrous capsular adhesion, hyalinosis, and podocytosis associated with interstitial fibrosis.	2009
actinin alpha 4(ACTN4)	19332469_7	Mice exhibited renal defects that included focal segmental glomerulosclerosis, proteinuria, glycosuria, and fibrosis.	2009
actinin alpha 4(ACTN4)	18948688_8	Kidney sections from saline-treated mice showed marked focal segmental glomerulosclerosis, tubular dilation with protein cast deposition, interstitial fibrosis, and numerous infiltrating macrophages and T lymphocytes.	2008
actinin alpha 4(ACTN4)	18927122_3	Both Rab-family and hedgehog-related proteins are involved in sclerosis and fibrosis in certain pathological states, but their roles in focal segmental glomerulosclerosis (FSGS) remain unclear.	2008
actinin alpha 4(ACTN4)	18786972_7	On histology, the FSGS+ group had a higher percentage of obsolete glomeruli (23.4% versus 12.7%, P < 0.01), and 31% of FSGS+ biopsies had >or=25% tubular atrophy/interstitial fibrosis while this was not observed in the FSGS- group (P < 0.01).	2008
actinin alpha 4(ACTN4)	18202467_8	No focal segmental glomerulosclerosis was identified but there was subcapsular fibrosis.	2008
actinin alpha 4(ACTN4)	18270495_7	RESULTS: During chronic anti-Thy1 nephritis, the formation of focal segmental glomerulosclerosis lesions, the degree of interstitial fibrosis as well as the increase in proteinuria over 14 weeks was ameliorated by everolimus treatment.	2008
actinin alpha 4(ACTN4)	18569931_10	One donor had early stage focal segmental glomerulosclerosis with non-significant proteinuria, and one donor had focal interstitial fibrosis with normal urine protein level.	2008
actinin alpha 4(ACTN4)	17371341_11	At the end stage, focal segmental glomerulosclerosis was seen; tubular epithelial cells lost their phenotype and interstitial fibrosis was notable.	2007
actinin alpha 4(ACTN4)	17979484_8	RESULTS: Racial differences in mean volume of nonsclerotic glomeruli and body mass index were not significant in any disease category, and African Americans had more severe disease as determined by sclerosis index, cortical fibrosis, and estimated glomerular filtration rate only in focal segmental glomerulosclerosis.	2007
actinin alpha 4(ACTN4)	17442739_7	Biopsies were analysed for the presence of FSGS, interstitial fibrosis and vascular lesions.	2007
actinin alpha 4(ACTN4)	16932363_7	Once initiated, podocyte lesions and ensuing fibrosis are usually irreversible, at least in human forms of FSGS.	2006
actinin alpha 4(ACTN4)	16572119_3	Renal biopsies of 389 adult MGN patients were evaluated semiquantitatively for interstitial fibrosis, tubular atrophy, vascular sclerosis, focal and segmental glomerulosclerosis lesions (FSGS), complement deposition, and stage and synchrony of deposits by electron microscopy (EM).	2006
actinin alpha 4(ACTN4)	16550755_11	In histopathological analysis of the second biopsy, lymphoma cells disappeared, but focal segmental glomerulosclerosis and moderate interstitial fibrosis were noted.	2006
actinin alpha 4(ACTN4)	16510766_7	Eight weeks after disease induction, anti-PDGF-D therapy significantly ameliorated focal segmental glomerulosclerosis, podocyte damage (de novo desmin expression), tubulointerstitial damage, and fibrosis as well as the accumulation of renal interstitial matrix including type III collagen and fibronectin.	2006
actinin alpha 4(ACTN4)	15835402_9	Early stage acute renal disease was characterized by focal segmental glomerulosclerosis (FSGS) and interstitial fibrosis (IF) at weeks 2 and 4 after I/R.	2005
actinin alpha 4(ACTN4)	15187198_12	CONCLUSIONS: In the cascade of events that lead to the initiation of glomerular fibrosis in FSGS, the putative glomerular permeability factor associated with FSGS may require a serine proteinase to effect its activity.	2004
actinin alpha 4(ACTN4)	15090265_11	In the L-SHRs serum creatinine was greatly increased, and microscopy showed thickening of arteriolar tunica media with an increase of the wall-to-lumen ratio, perivascular fibrosis, inflammatory infiltrated, tubular atrophy and interstitial fibrosis with focal segmental glomerulosclerosis.	2004
actinin alpha 4(ACTN4)	15569315_14	CONCLUSION: Blockade of CCR1 substantially reduced interstitial leukocyte accumulation and the subsequent renal fibrosis in a murine model of nephrotic syndrome and FSGS.	2004
actinin alpha 4(ACTN4)	14724343_2	Glomerular endothelial dysfunction is believed to be responsible for the proteinuria and nephronal damage, namely tubulointerstitial fibrosis and glomerulosclerosis, observed in severe nephrosis such as focal segmental glomerulosclerosis.	2004
actinin alpha 4(ACTN4)	15569315_5	We therefore studied the effect of the small-molecule CCR1 antagonist BX471 in a murine model of adriamycin-induced focal segmental glomerulosclerosis (FSGS) with nephrotic syndrome and progressive interstitial inflammation and fibrosis.	2004
actinin alpha 4(ACTN4)	15569315_9	RESULTS: At week 6, adriamycin-treated mice showed FSGS, associated with tubulointerstitial injury consisting of tubular dilation and atrophy, interstitial leukocyte infiltration, and fibrosis.	2004
actinin alpha 4(ACTN4)	12879860_1	Progression of chronic renal failure in focal segmental glomerulosclerosis: consequence of podocyte damage or of tubulointerstitial fibrosis?	2003
actinin alpha 4(ACTN4)	12704578_2	Idiopathic focal segmental glomerulosclerosis (FSGS) is a primary glomerular disease that essentially represents a form of chronic, progressive renal fibrosis for which there is no discernible cause.	2003
actinin alpha 4(ACTN4)	11143998_14	In rat models, we have found that both protein overload-induced and serum sickness-induced interstitial fibrosis are accompanied by the development of focal and segmental glomerulosclerosis.	2001
actinin alpha 4(ACTN4)	11461939_6	Semiquantitative immunostaining analysis of samples from 70 patients with several renal diseases, including IgA glomerulonephritis (GN) (n = 30), non-IgA GN (n = 5), membranous GN (n = 5), focal segmental glomerulosclerosis (n = 4), minor glomerular abnormalities (n = 5), lupus nephritis (n = 3), and acute or chronic tubulointerstitial nephritis (n = 18), revealed that the degree of renal interst…	2001
actinin alpha 4(ACTN4)	10843243_2	The spatial relationship between renal perfusion and nephronal structure was determined in 51 nephrotic patients consisting of 11 patients with steroid sensitive, minimal change (MC) nephrosis, 12 patients with steroid resistant, mesangial proliferative (MesP) nephrosis and without tubulointerstitial fibrosis (TIF), 11 patients with steroid resistant, MesP nephrosis and with low grade TIF and 17 …	2000
actinin alpha 4(ACTN4)	10516356_14	In CN, the presence of FSGS and the severity of interstitial fibrosis are negative independent predictors of graft survival.	1999
actinin alpha 4(ACTN4)	10516356_11	In addition, when we analyzed all patients with CN, graft survival correlated by multivariate analysis with the following parameters: serum creatinine level (P < 0.0001) and proteinuria (P = 0.004) at the time of diagnosis, presence of FSGS (P = 0.03), and degree of interstitial fibrosis and tubular atrophy (CN score; P < 0.0001, Cox).	1999
actinin alpha 4(ACTN4)	10328463_8	Focal segmental deposits of MBL were present in focal segmental glomerulosclerosis (4/6), IgA nephropathy (3/11), amyloidosis AL (1/4), and advanced renal fibrosis (2/2).	1999
actinin alpha 4(ACTN4)	10213868_3	The structural injuries which lead to this progressive loss of function consist of focal segmental glomerulosclerosis and tubulointerstitial fibrosis and atrophy.	1999
actinin alpha 4(ACTN4)	10213644_2	Tubular transport determined by the fractional excretion (FE) of filtered solutes was studied in 129 nephrotic patients; 72 patients with mesangial proliferation (MesP-NS) and intact tubulointerstitium (group 1), 13 patients with MesP-NS and superimposed tubulointerstitial fibrosis (TIF; group 2), 27 patients with mild focal segmental glomerulosclerosis (FSGS; group 3), and 17 patients with sever…	1999
actinin alpha 4(ACTN4)	9855119_7	Chronic FK506 nephropathy consisted of rough and foamy tubular vacuolization (5 biopsies), arteriolopathy (angiodegeneration of the arteriolar wall; 20 biopsies), focal segmental glomerulosclerosis (4 biopsies) and the striped form of interstitial fibrosis (11 biopsies).	1998
actinin alpha 4(ACTN4)	9829480_2	BACKGROUND: Focal segmental glomerulosclerosis (FSGS) is consistently associated with tubular degeneration and interstitial fibrosis, altogether, accounting for the progressive decline in renal function.	1998
actinin alpha 4(ACTN4)	9527398_7	Remnant kidneys were then assessed histologically for evidence of focal and segmental glomerulosclerosis and hyalinosis (FSGS), and interstitial fibrosis.	1998
actinin alpha 4(ACTN4)	9097714_10	Our morphometric data confirm that glomerular hypertrophy and the extent of interstitial fibrosis may be a valuable predictor of unfavorable evolution of FSGS as well as may be helpful in the differential diagnosis of MCD and FSGS in the elderly.	1996
actinin alpha 4(ACTN4)	9097714_5	Morphometric investigations were performed by means of a computer image analysis system to evaluate whether morphometric analysis may be helpful in morphological differential diagnosis of MCD and FSGS in adults as well as to study whether serum creatinine and changes in quantitatively analyzed glomeruli could correlate with the interstitial fibrosis.	1996
actinin alpha 4(ACTN4)	7857223_8	The morphology of long-term allografts was extremely variable from minor to extensive tubular atrophy, interstitial fibrosis, glomerular hypertrophy, focal and segmental glomerulosclerosis and vascular changes.	1995
actinin alpha 4(ACTN4)	8719545_9	Glomerular hypertrophy observed in our patients with primary FSGS was intercorrelated with the extent of glomerulosclerosis, mesangial expansion and interstitial fibrosis.	1995
actinin alpha 4(ACTN4)	7771480_3	Additional histologic features have been described in FSGS, including the position of the scar relative to the vascular and tubular pole of the glomerulus, foam cells, hyalinosis, mesangial deposits of immunoglobulin M, diffuse mesangial hypercellularity, glomerular visceral epithelial cell hyperplasia and hypertrophy, and the extent of associated interstitial fibrosis and tubular atrophy.	1995
actinin alpha 4(ACTN4)	7705820_3	Pediatric and adult HIV-positive patients both experience HIVAN morphologically after displaying focal segmental glomerulosclerosis, diffuse mesangial hyperplasia, microcystic tubular dilatation, interstitial inflammation, edema, and fibrosis.	1995
actinin alpha 4(ACTN4)	7611971_7	Allograft morphology was extremely variable from minor to extensive tubular atrophy, interstitial fibrosis, glomerular hypertrophy, focal and segmental glomerulosclerosis as well as vascular changes.	1995
actinin alpha 4(ACTN4)	7977317_3	Since interstitial inflammation may mediate cytokine-induced fibrosis, we evaluated the immune cell population in the interstitium and glomeruli in renal biopsy tissue from 10 HIV-infected patients with focal segmental glomerulosclerosis (HIVFGS), staining renal biopsy specimens for UCHL-1 (a T-cell marker), OPD4 (predominantly a T helper-cell marker), PG-M1 (a macrophage marker), and L26 (a B-ce…	1994
actinin alpha 4(ACTN4)	8428410_15	From these observations, we believe that the mesangial expansion, advanced GBM thickening, interstitial fibrosis and arteriolosclerosis are important morphological parameters, which may play a role in the genesis of FSGS or progression in MN.	1993
actinin alpha 4(ACTN4)	8428410_5	The patients with FSGS had a significantly greater degree of mesangial expansion, glomerular basement membrane (GBM) thickening, interstitial fibrosis, and arteriolosclerosis, as well as an increased level of serum creatinine, when compared to the patients without.	1993
actinin alpha 4(ACTN4)	1701048_3	The subtotal (5/6) nephrectomy performed in 23 adult female rats induced severe hypertrophy of residual parenchyma with interstitial fibrosis, tubular dilatation, and focal and segmental glomerulosclerosis (FSG).	1990
actinin alpha 4(ACTN4)	3897091_4	Her proteinuria was first detected at 15 years of age and renal biopsy specimens obtained at the same age were compatible with those of focal segmental glomerulosclerosis with interstitial fibrosis and tubular atrophy.	1985
activating transcription factor 3(ATF3)	26342068_11	Our data suggest that ATF3 suppresses fibrosis early but not late during infarct-induced heart failure.	2015
activating transcription factor 3(ATF3)	26342068_12	Although ATF3 deficiency was associated with more fibrosis, this did not occur at the expense of survival, which was higher in the ATF3-null mice.	2015
activating transcription factor 3(ATF3)	26342068_8	Similar to the slight favorable improvements in chamber dimensions at 2 wk, we also observed greater cardiomyocyte hypertrophy and more fibrosis in the noninfarcted regions of the ATF3-null hearts compared with the wild-type.	2015
activating transcription factor 3(ATF3)	23874609_9	Importantly, ATF3 expression in adult mice resulted in rapid ventricles hypertrophy, heart dysfunction, and fibrosis.	2013
activating transcription factor 3(ATF3)	22053207_1	Activating transcription factor 3 deficiency promotes cardiac hypertrophy, dysfunction, and fibrosis induced by pressure overload.	2011
activating transcription factor 3(ATF3)	22053207_7	ATF3 deficiency promoted cardiac hypertrophy, dysfunction and fibrosis after 4 weeks of AB compared to the wild type (WT) mice.	2011
activating transcription factor 3(ATF3)	18197826_9	Real Time PCR for IL-8, ATF-3, GADD45B, CXC Ligand 1, and CTGF compared to GAPDH validated microarray findings at 24 h. These in vitro findings in NHBE cells model environment-gene interaction for asbestos and BPDE, highlighting effects of inflammation, fibrosis, proliferation, and DNA damage recognition and repair.	2008
activating transcription factor 3(ATF3)	15629866_11	These results demonstrate that Smad3-ATF3 signaling mediates TGF-beta repression of ARE-dependent Phase II gene expression and potentially provide critical insight into mechanisms underlying TGF-beta1 function in carcinogenesis, tissue repair, and fibrosis.	2005
activating transcription factor 6 beta(ATF6B)	15180906_9	Cleavage sites were predicted in proteins such as the cystic fibrosis transmembrane conductance regulator (CFTR), transcription factors CREB-RP and OCT-1, and components of the ubiquitin pathway.	2004
activating transcription factor 6(ATF6)	26542291_1	miRNA-221 is elevated in cystic fibrosis airway epithelial cells and regulates expression of ATF6.	2015
activating transcription factor 6(ATF6)	24364984_9	Furthermore, siRNA-mediated knockdown of ATF6\xce\xb1 and ERp57 led to decreased inflammation, airway hyperresponsiveness and airway fibrosis.	2013
activating transcription factor 6(ATF6)	18022401_1	Coupling cystic fibrosis to endoplasmic reticulum stress: Differential role of Grp78 and ATF6.	2007
activator of Hsp90 ATPase activity 1(AHSA1)	20089831_4	Mutations in both the N- and C-terminal domains of Aha1 impair its ability to bind Hsp90 and stimulate its ATPase activity in vitro and impair in vivo the ability of the Hsp90 system to modulate the folding and trafficking of wild-type and variant (DeltaF508) cystic fibrosis transmembrane conductance regulator (CFTR) responsible for the inherited disease cystic fibrosis (CF).	2010
activator of Hsp90 ATPase activity 1(AHSA1)	20089831_1	Biological and structural basis for Aha1 regulation of Hsp90 ATPase activity in maintaining proteostasis in the human disease cystic fibrosis.	2010
activator of Hsp90 ATPase activity 1(AHSA1)	17110338_1	Hsp90 cochaperone Aha1 downregulation rescues misfolding of CFTR in cystic fibrosis.	2006
active BCR-related(ABR)	24177425_7	Sustained Atg7-induced autophagy in the CryABR120G hearts decreased interstitial fibrosis, ameliorated ventricular dysfunction, decreased cardiac hypertrophy, reduced intracellular aggregates and prolonged survival.	2013
active BCR-related(ABR)	18929425_7	All had steatohepatitis defined as inflammation, advanced fibrosis and ballooning with Mallory-Denk bodies (MDB) with frank cirrhosis in 6.	2008
active BCR-related(ABR)	17761281_11	The panel made recommendations that 1) if a decision is made to treat ABRS with an antibiotic agent, the clinician should prescribe amoxicillin as first-line therapy for most adults, 2) if the patient worsens or fails to improve with the initial management option by 7 days, the clinician should reassess the patient to confirm ABRS, exclude other causes of illness, and detect complications, 3) cli…	2007
activin A receptor like type 1(ACVRL1)	26337812_7	The in vivo protective effect of phyllanthin against carbon tetrachloride (CCl4)-induced hepatic fibrosis was established by studying the protein expressions of TGF-\xce\xb21, ALK5 and Smad2 and 3 and by determining various biochemical and histopathological parameters.	2015
activin A receptor like type 1(ACVRL1)	25393508_7	This review summarizes the indirect connection between BMP9 and liver fibrosis, with a focus on the BMP9 signaling pathway members ALK1, endoglin, Id1, hepcidin and Snail.	2014
activin A receptor like type 1(ACVRL1)	24594380_5	Activin receptor-like kinase 1 (ALK1) is a type I receptor of TGF-\xce\xb21 with an important role in angiogenesis whose function in cellular biology and TGF-\xce\xb2 signaling is well known in endothelial cells, but its role in fibroblast biology and its contribution to fibrosis is poorly studied.	2014
activin A receptor like type 1(ACVRL1)	24594380_7	Our aim was to evaluate the role of ALK1 in several processes involved in fibrosis such as ECM protein expression, proliferation and migration in ALK1(+/+) and ALK1(+/-) mouse embryonic fibroblasts (MEFs) after TGF-\xce\xb21 stimulations and inhibitors.	2014
activin A receptor like type 1(ACVRL1)	24055043_1	ALK1-Smad1/5 signaling pathway in fibrosis development: friend or foe?	2013
activin A receptor like type 1(ACVRL1)	23945497_1	Heterozygous disruption of activin receptor-like kinase 1 is associated with increased renal fibrosis in a mouse model of obstructive nephropathy.	2013
activin A receptor like type 1(ACVRL1)	23945497_4	To assess this we used the unilateral ureteral obstruction model of tubulointerstitial fibrosis in ALK1 haploinsufficient (ALK1(+/-)) and wild-type mice.	2013
activin A receptor like type 1(ACVRL1)	23894375_9	Fibrosis related genes, TGF-\xce\xb21, ALK 5 and PDGF, were only upregulated in Eng(+/+) mice during the early phase of radiation-induced cardiac damage (4 weeks).	2013
activin A receptor like type 1(ACVRL1)	23945497_3	Activin receptor-like kinase 1 (ALK1) is a transforming growth factor-\xce\xb21 type I receptor with a pivotal role in endothelial proliferation and migration, but its role in the development of renal fibrosis is unknown.	2013
activin A receptor like type 1(ACVRL1)	23945497_9	Thus, ALK1 modulates obstruction-induced renal fibrosis by increased extracellular matrix synthesis in myofibroblasts, but without differences in myofibroblast number.	2013
activin A receptor like type 1(ACVRL1)	21704403_8	RESULTS: Compared to wild type littermates, ALK1(+/-) mice developed less inflammation and fibrosis at 20 weeks after irradiation, but displayed an increase in pro-inflammatory and pro-fibrotic gene expression at 30 weeks.	2011
activin A receptor like type 1(ACVRL1)	22131199_8	These findings suggest that endoglin may play an important role in hepatic fibrosis by altering the balance of TGF-\xce\xb2 signaling via the ALK1-Smad1/5 and ALK-Smad2/3 pathways and raise the possibility that targeting endoglin expression in transdifferentiating hepatic stellate cells may represent a novel therapeutic strategy for the treatment of liver fibrosis.	2011
activin A receptor like type 1(ACVRL1)	17366323_2	TGF-beta, and its type 1 (ALK5) receptor, are critical to the pathogenesis of fibrosis.	2007
activin A receptor type 1(ACVR1)	11261590_7	This study demonstrated that ActR-I, ActR-1B and ActR-II are expressed on human fetal lung fibroblast and that activin A regulates fibroblast-mediated collagen gel contraction, suggesting that activin A might contribute to human lung fibroblast activities and structural remodeling observed in pulmonary fibrosis.	2001
activin A receptor type 1C(ACVR1C)	26249805_7	Our results revealed that ALK7 disruption led to an aggravated cardiac hypertrophic response that was accompanied by increased cardiac fibrosis and reduced contractile function, whereas cardiac-specific ALK7 overexpression exhibited the opposite phenotype in response to pressure overload.	2015
activin A receptor type 2A(ACVR2A)	17907296_10	ARIP2 may participate in the negative feedback regulation of signal transduction in the late stage by affecting the expression of ActRIIA and play an important role in regulation of development of liver fibrosis induced by activin.	2007
activin A receptor type 2A(ACVR2A)	11261590_7	This study demonstrated that ActR-I, ActR-1B and ActR-II are expressed on human fetal lung fibroblast and that activin A regulates fibroblast-mediated collagen gel contraction, suggesting that activin A might contribute to human lung fibroblast activities and structural remodeling observed in pulmonary fibrosis.	2001
acylaminoacyl-peptide hydrolase(APEH)	24924216_2	PURPOSE: To evaluate the distribution and extent of myocardial fibrosis identified by either contrast-enhanced Look-Locker or late gadolinium enhancement magnetic resonance imaging (LGE MRI) and their relationships between ventricular tachyarrhythmia or risk factors in apical hypertrophic cardiomyopathy (APH).	2014
acylaminoacyl-peptide hydrolase(APEH)	22016782_7	Remarkably, transfection of human bronchial epithelial cells with APEH siRNA, promoted a marked accumulation of a mutant of the cystic fibrosis transmembrane conductance regulator (CFTR), herein used as a model of misfolded protein typically degraded by UPS.	2011
acyl-CoA dehydrogenase family member 9(ACAD9)	26021874_11	Recent national legislation created provisions for newborn and infant screening, including for congenital hypothyroidism, phenylketonuria, congenital adrenal hyperplasia, cystic fibrosis and medium-chain acyl-CoA dehydrogenase, via blood spot test, otoacoustic emissions, systematic physical examination and hip ultrasound.	2015
acyl-CoA dehydrogenase family member 9(ACAD9)	18203033_16	The most important disorders screened for are described briefly: phenylketonuria, primary congenital hypothyroidism, cystic fibrosis, the galactosaemias, medium-chain acyl-CoA dehydrogenase deficiency, glutaryl-CoA dehydrogenase deficiency and congenital adrenal hyperplasia, together with several other disorders detectable by tandem mass spectrometry.	2008
acyl-CoA dehydrogenase family member 9(ACAD9)	18557804_4	The Victorian NBS program screens for phenylketonuria (PKU), cystic fibrosis, congenital hypothyroidism and more than 20 metabolic conditions, such as medium chain acyl-coenzyme A dehydrogenase (MCAD) deficiency.	2008
acyl-CoA dehydrogenase family member 9(ACAD9)	17616847_7	Twelve countries screen for congenital adrenal hyperplasia (CAH), 6 for cystic fibrosis (CF) and 7 for galactosaemia (GAL), 6 for biotinidase deficiency (BD) and 4 for medium-chain acyl-CoA dehydrogenase deficiency (MCAD).	2007
acyl-CoA dehydrogenase family member 9(ACAD9)	16960984_6	The following disorders are reviewed in the newborn screening fact sheets (which are available at www.pediatrics.org/cgi/content/full/118/3/e934): biotinidase deficiency, congenital adrenal hyperplasia, congenital hearing loss, congenital hypothyroidism, cystic fibrosis, galactosemia,homocystinuria, maple syrup urine disease, medium-chain acyl-coenzyme A dehydrogenase deficiency, phenylketonuria,…	2006
acyl-CoA dehydrogenase family member 9(ACAD9)	16571691_6	We describe and analyze these challenges through consideration of 3 disorders: phenylketonuria, medium-chain acyl-CoA dehydrogenase deficiency, and cystic fibrosis.	2006
acyl-CoA dehydrogenase family member 9(ACAD9)	16950973_4	The following disorders are discussed in this revision of the newborn screening fact sheets: biotinidase deficiency, congenital adrenal hyperplasia, congenital hearing loss, congenital hypothyroidism, cystic fibrosis, galactosemia, homocystinuria, maple syrup urine disease, medium-chain acyl-coenzyme A dehydrogenase deficiency, phenylketonuria, sickle cell disease and other hemoglobinopathies, an…	2006
acyl-CoA dehydrogenase family member 9(ACAD9)	11392180_1	Public health explores expanding newborn screening for cystic fibrosis, congenital adrenal hyperplasia, and medium-chain acyl coenzyme A dehydrogenase deficiency (MCAD).	2001
acyl-CoA dehydrogenase family member 9(ACAD9)	11392180_3	The Newborn Metabolic Disorder Screening Program (NMDSP) of the Oklahoma State Department of Health is evaluating the expansion of newborn screening for the disorders of cystic fibrosis, congenital adrenal hyperplasia, and medium-chain acyl coenzyme A dehydrogenase deficiency (MCAD) to the current screening battery of disorders (phenylketonuria, congenital hypothyroidism, galactosemia, and sickle…	2001
acyl-CoA dehydrogenase family member 9(ACAD9)	10947197_4	The concepts of such 'conformational disease' are illustrated by reference to cystic fibrosis, phenylketonuria and short-chain acyl-CoA dehydrogenase deficiency.	2000
acyl-CoA dehydrogenase family member 9(ACAD9)	10477427_2	Investigations of genetic diseases such as cystic fibrosis, alpha-1-antitrypsin deficiency, phenylketonuria, mitochondrial acyl-CoA dehydrogenase deficiencies, and many others have shown that enhanced proteolytic degradation of mutant proteins is a common molecular pathological mechanism.	1999
acyl-CoA dehydrogenase family member 9(ACAD9)	8503445_6	Considering examples of cystic fibrosis (CF) and medium-chain acyl-CoA dehydrogenase deficiency (MCAD), the two most frequent autosomal recessive disease in Caucasian populations and the two most frequent mutations (delta F508 and G985) that occur on these disease allele-bearing chromosomes, we show that, with 50-100 patients and a 20-fold larger sample of newborns screened for these mutations, t…	1993
acyl-CoA dehydrogenase, C-2 to C-3 short chain(ACADS)	21716672_3	We provide the sparse logistic regression by using smoothly clipped absolute deviation (SCAD) penalized function to diagnose the liver fibrosis in rats.	2011
acyl-CoA dehydrogenase, C-2 to C-3 short chain(ACADS)	21716672_1	Sparse logistic regression for diagnosis of liver fibrosis in rat by using SCAD-penalized likelihood.	2011
acyl-CoA dehydrogenase, C-2 to C-3 short chain(ACADS)	16651300_5	METHODS: Six hundred pediatricians from the American Academy of Pediatrics who practiced in Wisconsin, Colorado, Florida, or Illinois were queried about (1) testing high-risk infants and (2) universal NBS for cystic fibrosis (CF), glucose-6-phosphate dehydrogenase deficiency (G6PD), and type 1 diabetes.	2006
acyl-CoA dehydrogenase, C-4 to C-12 straight chain(ACADM)	21613803_5	RESULTS: While tubulointerstitial fibrosis in COL4A3-deficient mice was inhibited by MMF, 19 proteins in the kidneys were regulated: 12 with lower (ATPO, TAGL2, CAH1, TPD52, VA0D1, SERPH, GNAL, PSB6, EF1D, OTUB1, NDUS8, and NAPSA) and 7 with higher (ACADM, ACY3, CK054, ACTB/G, ACTB, UBP5, and ACY1) spot intensity.	2011
acyl-CoA synthetase bubblegum family member 1(ACSBG1)	25770676_15	When assessed longitudinally, concentrations of six neoepitopes (BGM, C1M, C3A, C3M, C6M, and CRPM) were significantly higher in patients with progressive idiopathic pulmonary fibrosis (n=71) than in patients with stable idiopathic pulmonary fibrosis (n=60) by 6 months.	2015
acyl-CoA synthetase bubblegum family member 1(ACSBG1)	25770676_12	In the discovery cohort, mean concentrations of seven neoepitopes (BGM, p=0\xc2\xb7009; C1M, p=0\xc2\xb7009; C3M, p=0\xc2\xb7046; C6M, p=0\xc2\xb7032; CRPM, p=0\xc2\xb7008; ELM2, p=0\xc2\xb702; and VICM, p=0\xc2\xb70007) differed significantly between healthy controls and participants with idiopathic pulmonary fibrosis.	2015
acyl-CoA synthetase bubblegum family member 1(ACSBG1)	23635022_5	A technically sound competitive ELISA for the measurement of BGM was generated and the assay was validated in a bovine cartilage explant culture (BEX), in a collagen induced model of rheumatoid arthritis (CIA) and in two different rat models of liver fibrosis: the carbon tetrachloride (CCL4)-induced fibrosis model, and the bile duct ligation (BDL) model.	2013
acyl-CoA synthetase bubblegum family member 1(ACSBG1)	23635022_7	Furthermore, there was a significant correlation of serum BGM levels with the extent of liver fibrosis determined by the Sirius red staining of liver sections in the CCL4 model.	2013
acyl-CoA synthetase long-chain family member 1(ACSL1)	26437572_4	We hypothesized that miR-34a may play a role in the process of hepatic fibrosis by targeting ACSL1.	2015
acyl-CoA synthetase long-chain family member 1(ACSL1)	26437572_3	Our previous work found that microRNA (miR)-34a expression was increased, while acy1-CoA synthetase long-chain family member1 (ACSL1) was decreased, in a dimethylnitrosamine (DNS)-induced hepatic fibrosis rat model.	2015
acyl-CoA synthetase long-chain family member 1(ACSL1)	26437572_12	CONCLUSIONS: miR-34a appears to play an important role in the process of liver fibrosis by targeting ACSL1 and may show promise as a therapeutic molecular target for hepatic fibrosis.	2015
acyl-CoA synthetase long-chain family member 1(ACSL1)	23567901_6	Compared with control mice fed with NPD, ACS1, and MHC-PPAR\xce\xb3, mice fed with NPD had reduced cardiac function and survival with cardiac fibrosis.	2013
acyl-CoA synthetase long-chain family member 1(ACSL1)	23567901_7	In contrast, ACS1 mice fed with high-dose FO had better cardiac function, survival, and less myocardial fibrosis.	2013
acyl-CoA synthetase long-chain family member 1(ACSL1)	23567901_11	Thus, dietary FO reverses fibrosis and improves cardiac function and survival of ACS1 mice but does not benefit all forms of lipid-mediated cardiomyopathy.	2013
acyl-CoA synthetase long-chain family member 1(ACSL1)	21366874_1	The rno-miR-34 family is upregulated and targets ACSL1 in dimethylnitrosamine-induced hepatic fibrosis in rats.	2011
acyl-CoA synthetase long-chain family member 1(ACSL1)	21366874_11	Our findings suggest that miRNA becomes dysregulated during hepatic fibrosis, and that the miR-34 family may be involved in the process by targeting ACSL1.	2011
acyl-CoA synthetase medium-chain family member 1(ACSM1)	25804096_7	We conclude that RSD attenuates myocardial fibrosis, the left atrial enlargement, and the left ventricular wall hypertrophy; inhibits the overdrive of the sympathetic nervous system (SNS), renin-angiotensin-aldosterone system (RAAS), and AVP system in TAC rats with chronic pressure overload.	2015
acyl-CoA synthetase medium-chain family member 1(ACSM1)	25151145_2	Patients with rheumatic heart disease (RHD) often experience persistent atrial fibrillation (AF) associated with adverse atrial structural remodeling (ASR) manifested by atrial fibrosis and left atrial enlargement.	2014
acyl-CoA synthetase medium-chain family member 1(ACSM1)	6211082_1	Effects of left atrial enlargement on atrial transmembrane potentials and structure in dogs with mitral valve fibrosis.	1982
acyl-CoA synthetase medium-chain family member 1(ACSM1)	6211082_2	The effects of left atrial enlargement on atrial cell electrophysiology and structure were studied in dogs with mitral valve fibrosis.	1982
acyl-CoA synthetase medium-chain family member 1(ACSM1)	7058756_7	The pattern of chordal and papillary muscle fibrosis and calcification was frequently associated with mitral anular calcification, aortic valve fibrosis or calcification and left atrial enlargement.	1982
acyl-CoA synthetase medium-chain family member 3(ACSM3)	26138121_4	This study identifies a smooth muscle cell autocrine/paracrine signaling network that augments myogenic tone in a murine model of experimental SAH: it links tumor necrosis factor-\xce\xb1 (TNF\xce\xb1), the cystic fibrosis transmembrane conductance regulator, and sphingosine-1-phosphate signaling.	2015
acyl-CoA synthetase medium-chain family member 3(ACSM3)	26556770_5	To investigate whether decorin, a natural antagonist for TGF-\xce\xb21, protects against subarachnoid fibrosis and chronic hydrocephalus after SAH, two-hemorrhage-injection SAH model was conducted in 6-week-old rats.	2015
acyl-CoA synthetase medium-chain family member 3(ACSM3)	26556770_13	In conclusion, rhDecorin suppresses extracellular matrix accumulation and following subarachnoid fibrosis via inhibiting TGF-\xce\xb21/Smad/CTGF pathway, preventing development of hydrocephalus and attenuating long-term neurocognitive defects after SAH.	2015
acyl-CoA synthetase medium-chain family member 3(ACSM3)	18323479_2	BACKGROUND AND PURPOSE: The possible cause of chronic hydrocephalus after subarachnoid hemorrhage (SAH) has been reported to be meningeal fibrosis.	2008
acyl-CoA synthetase medium-chain family member 3(ACSM3)	18323479_3	We examined whether the induction of tenascin-C (TN-C), an extracellular matrix glycoprotein known to promote tissue fibrosis, was associated with chronic hydrocephalus after SAH.	2008
acyl-CoA synthetase medium-chain family member 3(ACSM3)	17881943_11	CONCLUSION: In addition to precipitating leptomeningeal fibrosis within the convexity subarachnoid space and/or arachnoid granulations (causing delayed hydrocephalus), cerebral aneurysmal SAH may also rarely elicit widespread symptomatic fibrotic obliteration of the spinal subarachnoid space.	2007
acyl-CoA synthetase medium-chain family member 3(ACSM3)	12069283_14	However, the late phase upregulation of bFGF might lead to the vascular angiopathy, fibrosis or hyperplasia during the chronic stage of SAH.	2002
acyl-CoA synthetase medium-chain family member 3(ACSM3)	10932268_2	BACKGROUND: Meningeal fibrosis following subarachnoid hemorrhage (SAH) has been verified histologically in experimental animals and in human autopsy samples, but the clinical course of the intrathecal fibroproliferative reaction is unknown.	2000
acyl-CoA synthetase medium-chain family member 3(ACSM3)	10452955_2	Arachnoidal fibrosis following subarachnoid hemorrhage (SAH) has been suggested to play a pathogenic role in the development of late post-hemorrhagic hydrocephalus in humans.	1999
acyl-CoA synthetase medium-chain family member 3(ACSM3)	10389884_13	This does not exclude the possibility that SAH causes generalized fibrosis in the subarachnoid space.	1999
acyl-CoA synthetase medium-chain family member 3(ACSM3)	7644116_2	Some disorders of the central nervous system, such as trauma, meningitis, or subarachnoid hemorrhage (SAH), result in inflammation and fibrosis of the arachnoid membranes followed by hydrocephalus.	1995
acyl-CoA synthetase medium-chain family member 3(ACSM3)	7644116_7	These findings suggest that thrombin and TGF-beta, which may be elevated in CSF following SAH, may cause subarachnoid fibrosis and subsequent hydrocephalus.	1995
acyl-CoA synthetase medium-chain family member 3(ACSM3)	8748833_3	Subarachnoid haemorrhage (SAH) often leads to subarachnoid fibrosis and resultant normal pressure hydrocephalus; however, how subarachnoid fibrosis occurs is unknown.	1995
acyl-CoA synthetase medium-chain family member 3(ACSM3)	1727173_2	It is unclear if vasospasm after subarachnoid hemorrhage (SAH) is predominantly due to smooth-muscle contraction, proliferative vasculopathy, or other changes within the arterial wall such as fibrosis or change in smooth-muscle phenotype.	1992
acyl-CoA synthetase medium-chain family member 3(ACSM3)	1423039_4	Arterial fibrosis was not detected during vasospasm, although there was intimal hyperplasia with fibrosis 28 days after SAH.	1992
acyl-CoA synthetase medium-chain family member 3(ACSM3)	7198859_14	These findings indicate that AMCA suppresses PA primarily in the leptomeninges during the first few days after SAH and presumably before the meningeal fibrosis has developed.	1981
acyl-CoA synthetase medium-chain family member 3(ACSM3)	394583_3	The author used the scanning electron microscope (SEM) to study the influence of urokinase on subarachnoid fibrosis after experimental subarachnoid haemorrhage (SAH).	1979
acyl-CoA synthetase medium-chain family member 3(ACSM3)	394583_4	In the subchronic group of dogs, which were sacrificed three weeks after SAH, an average of 45--50 IU/kg of intrathecal urokinase diminished the fibrosis.	1979
acyl-CoA synthetase medium-chain family member 3(ACSM3)	517196_2	Sixty dogs with experimental subarachnoid haemorrhage (SAH), repeated SAH, and subarachnoid fibrosis (examined three weeks and three months after SAH, and treated with urokinase or dexamethasone) were examined by scanning electron microscope (SEM).	1979
acyl-CoA synthetase medium-chain family member 3(ACSM3)	532727_5	In the chronic group, sacrificed three months after SAH, an average of 0.95 mg/kg intrathecal dexamethasone did not prevent the fibrosis, and no significant difference was found from the untreated dogs.	1979
acyl-CoA synthetase medium-chain family member 3(ACSM3)	532727_4	In the subchronic group of dogs, which were sacrificed three weeks after SAH, an average of 2.82 mg/kg intrathecal dexamethasone seemed to delay the fibrosis somewhat, but statistically showed no significant difference from the control group.	1979
acyl-CoA synthetase medium-chain family member 3(ACSM3)	532727_3	The author used the scanning electron microscope (SEM) to study the influence of dexamethasone on subarachnoid fibrosis after experimental subarachnoid haemorrhage (SAH).	1979
acyl-CoA thioesterase 12(ACOT12)	3714345_2	Thirty-four patients with cystic fibrosis (CF) were assessed for baseline pulmonary functions before, and 5 and 15 minutes after cold air challenge (CACh).	1986
acyl-CoA thioesterase 7(ACOT7)	18426999_4	TAC for 3 weeks in wild-type control (Bach1(+/+)) mice produced LV hypertrophy and remodeling manifested by increased heart weight, histological findings showing increased myocyte cross-sectional area (CSA) and interstitial fibrosis (picro Sirius red staining), reexpressions of ANP, BNP, and betaMHC genes, and echocardiographic findings showing wall thickening, LV dilatation, and reduced LV contr…	2008
acyl-CoA thioesterase 8(ACOT8)	10567600_1	Hypertensive encephalopathy in a patient with retroperitoneal fibrosis.	1999
acyl-CoA thioesterase 8(ACOT8)	6438118_2	Hamster trachea epithelial (HTE) cells were shown to respond to 20% cystic fibrosis serum (CFS) by secreting twice as much protein as in the presence of 20% normal human serum (NHS).	1984
acyl-CoA thioesterase 8(ACOT8)	6690453_12	Exposure of HTE cells to whole sera from cystic fibrosis patients resulted in heightened secretion rates as compared to results obtained with normal sera.	1984
ADAM metallopeptidase domain 10(ADAM10)	19432809_5	We showed an increased expression of the sheddases ADAM10 and ADAM17 in patients with chronic liver diseases that was associated with the severity of liver fibrosis.	2009
ADAM metallopeptidase domain 10(ADAM10)	10577965_1	Detection of anti-ADAM 10 antibody in serum of a patient with pulmonary fibrosis associated with dermatomyositis.	1999
ADAM metallopeptidase domain 10(ADAM10)	10577965_8	CONCLUSION: This is the first report that demonstrates the existence of anti-ADAM 10 antibody in a patient with pulmonary fibrosis associated with dermatomyositis.	1999
ADAM metallopeptidase domain 12(ADAM12)	23578941_1	The ADAM12 is upregulated in synovitis and postinflammatory fibrosis of the synovial membrane in patients with early radiographic osteoarthritis.	2013
ADAM metallopeptidase domain 12(ADAM12)	23578941_11	Out of several features of synovitis the expression level of both splice variants correlated only with the grade of fibrosis in the synovium (\xcf\x81=0.30, P<0.05 for ADAM12-L and \xcf\x81=0.33, P<0.05 for ADAM12-S).	2013
ADAM metallopeptidase domain 12(ADAM12)	23578941_13	We suggest that ADAM12 could be implicated in the development of KOA-associated synovitis, especially in the occurrence of postinflammatory fibrosis.	2013
ADAM metallopeptidase domain 12(ADAM12)	22540429_8	Furthermore, in dcSSc patients with disease duration of \xe2\x89\xa4 6 years, serum ADAM12-S levels correlated positively with modified Rodnan total skin thickness score, ground glass score, and serum C-reactive protein values, while showed inverse correlation with fibrosis score.	2012
ADAM metallopeptidase domain 12(ADAM12)	22540429_9	CONCLUSION: Elevated serum ADAM12-S levels are associated with elevated serum inflammatory marker, severity of skin fibrosis, and activity of interstitial lung disease in dcSSc, suggesting the possible contribution of ADAM12-S to the pathological events in this disorder.	2012
ADAM metallopeptidase domain 12(ADAM12)	22540429_1	Serum levels of ADAM12-S: possible association with the initiation and progression of dermal fibrosis and interstitial lung disease in patients with systemic sclerosis.	2012
ADAM metallopeptidase domain 12(ADAM12)	23172306_6	Among the metalloproteinases that act in concert with other mediators to elevate the systemic blood pressure and to modulate the development of cardiovascular hypertrophy and fibrosis processes are MMP-2, MMP-7, ADAM-12, and ADAM-17.	2012
ADAM metallopeptidase domain 12(ADAM12)	19581512_10	These findings provide the first in vivo evidence that agonist-induced cardiac hypertrophy and fibrosis processes are signaled through TACE, which acts through novel pathways involving transcriptional regulation of ADAM-12 and MMP-2.	2009
ADAM metallopeptidase domain 12(ADAM12)	19581512_7	Mice receiving angiotensin II (1.4 mg/kg per day for 12 days) exhibited cardiac hypertrophy, as well as fibrosis, which was associated with elevated myocardial expression of molecular markers of hypertrophy (alpha-skeletal actin, beta-myosin heavy chain, and brain natriuretic peptide) and fibrosis (collagen types I and III and fibronectin), as well as MMP-2 and ADAM-12.	2009
ADAM metallopeptidase domain 12(ADAM12)	19778441_11	CONCLUSION: In this work, confronting differential models with qualitative biological observations, we obtained predictions giving new insights into the role of ADAM12 in TGF-beta signaling and hepatic fibrosis process.	2009
ADAM metallopeptidase domain 12(ADAM12)	19581512_9	Moreover, knockdown of TACE inhibited angiotensin II-induced overexpression of markers of myocardial hypertrophy and fibrosis, as well as ADAM-12 and MMP-2.	2009
ADAM metallopeptidase domain 12(ADAM12)	19933416_16	The levels of ADAM-12, apoptosis, and fibrosis were robust and integrin were decreased in AVF hearts.	2009
ADAM metallopeptidase domain 12(ADAM12)	19778441_5	In liver, we have recently showed that the disintegrin and metalloproteinase ADAM12 interacts with TGF-beta receptors and modulates their trafficking among membranes, a crucial point in TGF-beta signaling and development of fibrosis.	2009
ADAM metallopeptidase domain 12(ADAM12)	17982130_8	Surprisingly, we observed loss of skeletal muscle and accelerated fibrosis and adipogenesis in 1-year-old mdx mice transgenically overexpressing ADAM12 (ADAM12(+)/mdx mice), even though their utrophin levels were mildly elevated compared with age-matched controls.	2007
ADAM metallopeptidase domain 12(ADAM12)	12958164_9	ADAM12, IGF-I, and myostatin blockade promote regeneration and reduce fibrosis.	2003
ADAM metallopeptidase domain 15(ADAM15)	22628376_19	In conclusion, E2 therapy reverses adverse RV remodeling associated with PH by reversing fibrosis and upregulation of novel ECM enzymes ADAM15, ADAM17, and OPN.	2012
ADAM metallopeptidase domain 17(ADAM17)	25641377_12	CONCLUSION: Our data demonstrate that TACE-induced hepatic hypoxia aggravates the fibrosis progression in peritumoral liver tissue, thus leads to the deterioration of liver function.	2015
ADAM metallopeptidase domain 17(ADAM17)	25641377_5	Hepatic artery ligation was performed in carbon tetrachloride-induced rat hepatic fibrosis model to mimic the effect of hepatic hypoxia on liver fibrosis after TACE.	2015
ADAM metallopeptidase domain 17(ADAM17)	25928762_7	The severity of liver fibrosis was ameliorated in Group C. The combination of PGE1 and iodized olive oil prevented the development of liver fibrosis following TACE.	2015
ADAM metallopeptidase domain 17(ADAM17)	25928762_4	After TACE, the levels of hyaluronic acid (HA), procollagen III (PC III), laminin (LN), and collagen IV (IV-C) were measured, and the severity of liver fibrosis as well as the morphology of liver tissues were determined.	2015
ADAM metallopeptidase domain 17(ADAM17)	25928762_2	To explore the preventative effects of prostaglandin E1 (PGE1) on a rabbit model of CCl4-induced liver fibrosis after transcatheter arterial chemoembolization (TACE), we generated a rabbit model of CCl4-induced liver fibrosis by treatment with 40% CCl4 in iodized olive oil for 16 weeks.	2015
ADAM metallopeptidase domain 17(ADAM17)	25236578_8	These findings suggested that TACE overexpression induced macrophage infiltration and subsequent fibrosis in adipose tissues under HFD regimen.	2014
ADAM metallopeptidase domain 17(ADAM17)	24412389_3	A disintegrin and metalloproteinase 17 (ADAM17) is thought to promote renal fibrosis, cardiac hypertrophy with fibrosis and atherosclerosis by activation of the EGFR through secretion of EGFR ligands.	2014
ADAM metallopeptidase domain 17(ADAM17)	24412389_9	SIGNIFICANCE: These results indicate that ADAM17 mediates Ang II-induced EGFR transactivation on HSCs, and that this process may participate in the progression of liver fibrosis.	2014
ADAM metallopeptidase domain 17(ADAM17)	23816535_11	These observations suggest that selective TACE inhibition is an effective approach for the treatment of both immune mediated hepatic inflammation and fibrosis.	2013
ADAM metallopeptidase domain 17(ADAM17)	23703665_10	NOX2(-/-) mice on the CDAA or WD had no significant change in Sirt1, Timp3, and TACE activity or the fibrosis markers assessed.	2013
ADAM metallopeptidase domain 17(ADAM17)	23816535_6	To investigate this, we studied the effects of a selective TACE inhibitor DPC-333 on murine model of liver injury and fibrosis induced with concanavalin A (Con A).	2013
ADAM metallopeptidase domain 17(ADAM17)	23147225_13	These results also suggest that TACE and EGFR on fibroblasts may be novel therapeutic targets of dermal fibrosis, which is induced after diverse inflammatory disorders of the skin.	2012
ADAM metallopeptidase domain 17(ADAM17)	23167415_11	CONCLUSIONS: Low-, compared with conventional-dose chemotherapy exerts the same impact on the variation of fibrosis related indicators and has no influence on median survival time and survival rate after TACE in HCC patients.	2012
ADAM metallopeptidase domain 17(ADAM17)	23167415_4	Four serum fibrosis related indicators, hyaluronic acid(HA), human pro-collagen type-III (hPC-III), laminin (LN), and collagen type-IV(IV-C) before TACE were compared with the values 7 days after TACE.	2012
ADAM metallopeptidase domain 17(ADAM17)	23172306_6	Among the metalloproteinases that act in concert with other mediators to elevate the systemic blood pressure and to modulate the development of cardiovascular hypertrophy and fibrosis processes are MMP-2, MMP-7, ADAM-12, and ADAM-17.	2012
ADAM metallopeptidase domain 17(ADAM17)	22413019_2	BACKGROUND: The disintegrin and metalloenzyme ADAM17 participates in numerous inflammatory and proliferative diseases, and its pathophysiological role was implicated in kidney fibrosis, polycystic kidney disease and other chronic kidney diseases.	2012
ADAM metallopeptidase domain 17(ADAM17)	22628376_19	In conclusion, E2 therapy reverses adverse RV remodeling associated with PH by reversing fibrosis and upregulation of novel ECM enzymes ADAM15, ADAM17, and OPN.	2012
ADAM metallopeptidase domain 17(ADAM17)	23216644_10	RESULTS: TACE treated tumors displayed greater necrosis and fibrosis than non-TACE treated samples but there were no differences in morphology between the viable tumor cells of both groups.	2012
ADAM metallopeptidase domain 17(ADAM17)	22799372_6	CONCLUSION: To hepatocellular carcinoma patients treated by TACE, reducing doses of chemotherapy drugs can reduce progress of liver fibrosis, without impacting on five year survival.	2012
ADAM metallopeptidase domain 17(ADAM17)	22799372_2	OBJECTIVE: To investigate liver fibrosis, TGF-?1 levels and curative effects on hepatocellular carcinoma (HCC) with small and conventional dose perfusion chemotherapy by transcatheter arterial chemo embolization (TACE).	2012
ADAM metallopeptidase domain 17(ADAM17)	23147225_3	Recent studies have suggested that overexpression of TACE may be associated with the pathogenesis of inflammation and fibrosis.	2012
ADAM metallopeptidase domain 17(ADAM17)	23147225_4	To determine the roles of TACE in inflammation and fibrosis, TACE transgenic (TACE-Tg) mice, which overexpressed TACE systemically, were generated.	2012
ADAM metallopeptidase domain 17(ADAM17)	23167415_2	OBJECTIVES: To explore the impact of low- vs conventional-dose chemotherapy via transcatheter arterial chemo-embolization (TACE) on serum fibrosis indicators and treatment efficacy of hepatocellular cancer patients (HCC).	2012
ADAM metallopeptidase domain 17(ADAM17)	23147225_8	Interestingly, the degree of dermal fibrosis at day 7 was significantly higher in TACE-Tg mice than in wild-type mice.	2012
ADAM metallopeptidase domain 17(ADAM17)	22015440_13	CONCLUSIONS: In conclusion, HB-EGF co-expresses with ADAM17 in renal interstitial fibrosis, suggesting a potential interaction in IF/TA.	2011
ADAM metallopeptidase domain 17(ADAM17)	22015440_1	ADAM17 up-regulation in renal transplant dysfunction and non-transplant-related renal fibrosis.	2011
ADAM metallopeptidase domain 17(ADAM17)	21079048_10	Downstream of MMP-7 and TACE, MMP-2 mediated angiotensin II-induced hypertension, but did not mediate cardiac hypertrophy or fibrosis.	2010
ADAM metallopeptidase domain 17(ADAM17)	20184396_5	It is therefore not surprising that ADAM-17 is implicated in numerous human diseases including cancer, heart disease, diabetes, rheumatoid arthritis, kidney fibrosis, Alzheimer's disease, and is a promising target for future treatments.	2010
ADAM metallopeptidase domain 17(ADAM17)	21079048_8	RNA interference targeting MMP-7 and TACE attenuated the angiotensin II-induced upregulation of MMP-2 and prevented the development of hypertension, as well as development of cardiac hypertrophy and fibrosis.	2010
ADAM metallopeptidase domain 17(ADAM17)	20087163_1	ADAM-17 is activated by the mitogenic protein kinase ERK in a model of kidney fibrosis.	2010
ADAM metallopeptidase domain 17(ADAM17)	20593020_4	Inflammation is considered a prerequisite and important co-contributor to fibrosis and is, in part, mediated by tumor necrosis factor (TNF)-alpha-converting enzyme (TACE).	2010
ADAM metallopeptidase domain 17(ADAM17)	19581512_9	Moreover, knockdown of TACE inhibited angiotensin II-induced overexpression of markers of myocardial hypertrophy and fibrosis, as well as ADAM-12 and MMP-2.	2009
ADAM metallopeptidase domain 17(ADAM17)	19432809_5	We showed an increased expression of the sheddases ADAM10 and ADAM17 in patients with chronic liver diseases that was associated with the severity of liver fibrosis.	2009
ADAM metallopeptidase domain 17(ADAM17)	19581512_8	Treatment with TACE small-interfering RNA (but not with PBS or luciferase small-interfering RNA) inhibited TACE expression, thus preventing angiotensin II-induced cardiac hypertrophy and fibrosis.	2009
ADAM metallopeptidase domain 17(ADAM17)	19535569_9	Peritubular capillary and proximal tubular ADAM17 were associated with interstitial fibrosis and interstitial macrophage infiltration (P < 0.05).	2009
ADAM metallopeptidase domain 17(ADAM17)	19535569_3	In mice, angiotensin II infusion induces renal fibrosis via ADAM17-mediated TGF-alpha shedding and subsequent EGFR activation.	2009
ADAM metallopeptidase domain 17(ADAM17)	19581512_10	These findings provide the first in vivo evidence that agonist-induced cardiac hypertrophy and fibrosis processes are signaled through TACE, which acts through novel pathways involving transcriptional regulation of ADAM-12 and MMP-2.	2009
ADAM metallopeptidase domain 17(ADAM17)	19535569_14	In conclusion, the ADAM17 expression pattern and its role in shedding TGF-alpha from cultured human kidney cells suggest a role in the development of fibrosis.	2009
ADAM metallopeptidase domain 17(ADAM17)	19535569_15	Since EGFR signaling is implicated in renal fibrosis, targeting ADAM17 to reduce availability of EGFR ligand TGF-alpha may represent a promising way of intervention in human renal disease.	2009
ADAM metallopeptidase domain 17(ADAM17)	19535569_11	In renal fibrosis, ADAM17 colocalized with TGF-alpha.	2009
ADAM metallopeptidase domain 17(ADAM17)	16600387_4	Renal lesions such as glomerulosclerosis, tubular atrophy, fibrosis, mononuclear cell infiltration and proteinuria following chronic Ang II infusion are substantially reduced in mice lacking TGF-alpha and those given a specific TACE inhibitor.	2006
ADAM metallopeptidase domain 19(ADAM19)	19601835_11	Abnormally high expression of ADAM19 is also linked to inflammation and fibrosis of the lung and kidney.	2009
ADAM metallopeptidase domain 19(ADAM19)	16900093_13	ADAM19 in proximal tubules and in peritubular capillaries was associated with interstitial fibrosis (P<0.05).	2006
ADAM metallopeptidase domain 19(ADAM19)	16827870_7	To determine whether ADAM19 is specifically related to CAN, we studied transplant biopsies with and without CAN, acute rejection and non-transplant-related kidney diseases: interstitial fibrosis (IF), interstitial atrophy, glomerular fibrosis and interstitial inflammation.	2006
ADAM metallopeptidase domain 19(ADAM19)	16827870_10	When compared to CAN, ADAM19 was expressed to a similar extent in non-transplant-related interstitial and glomerular fibrosis, interstitial atrophy and inflammation.	2006
ADAM metallopeptidase domain 2(ADAM2)	19581512_7	Mice receiving angiotensin II (1.4 mg/kg per day for 12 days) exhibited cardiac hypertrophy, as well as fibrosis, which was associated with elevated myocardial expression of molecular markers of hypertrophy (alpha-skeletal actin, beta-myosin heavy chain, and brain natriuretic peptide) and fibrosis (collagen types I and III and fibronectin), as well as MMP-2 and ADAM-12.	2009
ADAM metallopeptidase domain 2(ADAM2)	17584198_7	By chest-CT, 15 SSc patients showed interstitial pulmonary fibrosis.	2007
ADAM metallopeptidase domain 28(ADAM28)	25453333_3	OBJECTIVES: The aim of this study was to evaluate the roles of ADAM33, ADAM28, IL4, IL6, IL10 and IL13 in the development of inflammation and alveolar fibrosis due to lethal acute respiratory infections of the lower airway in a pediatric population, especially in those with viral etiology.	2014
ADAM metallopeptidase domain 28(ADAM28)	25453333_2	BACKGROUND: ADAM28, ADAM33, IL-13, IL-4 and other cytokines (IL-6 and IL-10) seem to play important roles in the persistence and maintenance of acute inflammatory processes that ultimately lead to lung remodeling and pulmonary fibrosis, which may be responsible for the high morbidity and mortality rates associated with non-pandemic acute viral pneumonias in childhood.	2014
ADAM metallopeptidase domain 28(ADAM28)	18490073_9	Significant differences between histological stages of fibrosis were found for ADAM-28, MMP-2 and MMP-9.	2008
ADAM metallopeptidase domain 33(ADAM33)	25453333_2	BACKGROUND: ADAM28, ADAM33, IL-13, IL-4 and other cytokines (IL-6 and IL-10) seem to play important roles in the persistence and maintenance of acute inflammatory processes that ultimately lead to lung remodeling and pulmonary fibrosis, which may be responsible for the high morbidity and mortality rates associated with non-pandemic acute viral pneumonias in childhood.	2014
ADAM metallopeptidase domain 33(ADAM33)	24728305_1	ADAM33 gene polymorphisms are associated with the risk of idiopathic pulmonary fibrosis.	2014
ADAM metallopeptidase domain 33(ADAM33)	25453333_3	OBJECTIVES: The aim of this study was to evaluate the roles of ADAM33, ADAM28, IL4, IL6, IL10 and IL13 in the development of inflammation and alveolar fibrosis due to lethal acute respiratory infections of the lower airway in a pediatric population, especially in those with viral etiology.	2014
ADAM metallopeptidase domain 33(ADAM33)	24728305_3	ADAM33 is a disintegrin and metalloprotease domain-containing protein, which may be related to lung fibrosis by exerting angiogenesis and remodeling of the lung.	2014
ADAM metallopeptidase domain 33(ADAM33)	20008875_9	The cross talk between the epithelium and the underlying mesenchyme to drive remodeling responses is considered in the context of subepithelial fibrosis and potential pathogenetic mechanisms linked to the asthma susceptibility gene, a disintegrin and metalloprotease (ADAM)33.	2009
ADAM metallopeptidase domain 7(ADAM7)	23172306_6	Among the metalloproteinases that act in concert with other mediators to elevate the systemic blood pressure and to modulate the development of cardiovascular hypertrophy and fibrosis processes are MMP-2, MMP-7, ADAM-12, and ADAM-17.	2012
ADAM metallopeptidase domain 8(ADAM8)	20683884_8	In contrast, ADAM8 KO mice did not display a bone phenotype in vivo, but unlike WT littermates, they did not increase RANKL production, OCL formation, or calvarial fibrosis in response to tumor necrosis factor \xce\xb1 (TNF-\xce\xb1) in vivo.	2010
ADAM metallopeptidase domain 8(ADAM8)	7321153_3	As to myocardial fibrosis, 1) perivascular fibrosis, caused mainly by perivascular inflammation and partly by myocardial strain, varied in grade according to the types of the valvular disease, i.e., most severe in mitral regurgitation (MR) and combined valvular disease (CVD) and least in mitral stenosis (MS); 2) Aschoff's nodes: 3 typical and 8 atypical cases were found; 3) perimycial fibrosis du…	1981
ADAM metallopeptidase with thrombospondin type 1 motif 1(ADAMTS1)	21826695_5	We undertook a gene-expression screen of human liver fibrosis samples using a dedicated gene array selected for relevance to protease activities, identifying the ADAMTS1 (A Disintegrin And Metalloproteinase [ADAM] with thrombospondin type 1 motif, 1) gene as an important node of the protease network.	2011
ADAM metallopeptidase with thrombospondin type 1 motif 1(ADAMTS1)	21826695_6	Up-regulation of ADAMTS1 in fibrosis was found to be associated with hepatic stellate cell (HSC) activation.	2011
ADAM metallopeptidase with thrombospondin type 1 motif 1(ADAMTS1)	21826695_12	Using a mouse liver fibrosis model, we show that carbon tetrachloride treatment induces ADAMTS1 expression in parallel to that of type I collagen.	2011
ADAM metallopeptidase with thrombospondin type 1 motif 1(ADAMTS1)	22030458_11	CONCLUSIONS: In the remnant kidney, there was increased fibrosis with increased \xce\xb1-SMA and Ki-67 staining and significantly increased expression of MMP-2, MMP-9, TIMP-1, ADAMTS-1, and FSP-1.	2011
ADAM metallopeptidase with thrombospondin type 1 motif 1(ADAMTS1)	17583485_1	Expression and significance of a disintegrin and metalloproteinase with thrombospondin motifs (ADAMTS)-1 in an animal model of renal interstitial fibrosis induced by unilateral ureteral obstruction.	2007
ADAM metallopeptidase with thrombospondin type 1 motif 1(ADAMTS1)	17583485_2	To evaluate the pathological roles of a disintegrin and metalloproteinase with thrombospondin motifs (ADAMTS)-1 in rat renal interstitial fibrosis, we examined the expression, localization and effect on growth of ADAMTS-1 in a normal rat kidney cell line (NRK-49F).	2007
ADAM metallopeptidase with thrombospondin type 1 motif 1(ADAMTS1)	17360544_6	Purity, as well as biological features and morphological characteristics of normal ATII cells, was demonstrated for the hES-ATII cells, including lamellar body formation, expression of surfactant proteins A, B, and C, alpha-1-antitrypsin, and the cystic fibrosis transmembrane conductance receptor, as well as the synthesis and secretion of complement proteins C3 and C5.	2007
ADAM metallopeptidase with thrombospondin type 1 motif 1(ADAMTS1)	15615810_12	At 6 months and 1 year of age, the Adamts-1 null mice displayed interstitial fibrosis in the cortical and medullary regions of the kidney.	2004
ADAM metallopeptidase with thrombospondin type 1 motif 1(ADAMTS1)	15615810_1	Neonatal calyceal dilation and renal fibrosis resulting from loss of Adamts-1 in mouse kidney is due to a developmental dysgenesis.	2004
ADAM metallopeptidase with thrombospondin type 1 motif 10(ADAMTS10)	19101912_5	From 1 year to 5 years after LTx, the prevalence of fibrosis increased from 31% to 65% (n = 66) but remained stable thereafter (at 10 years, 69%, n = 55).	2008
ADAM metallopeptidase with thrombospondin type 1 motif 10(ADAMTS10)	14741717_7	Thereafter, the SDT rat islets were affected with inflammation and progressive fibrosis (at 10-20 weeks), and eventually atrophied with a loss of beta-cells (at 38 weeks).	2004
ADAM metallopeptidase with thrombospondin type 1 motif 10(ADAMTS10)	14592959_6	In the further studies, either castration (at 10 wk of age) or flutamide, an androgen receptor antagonist, markedly attenuated cardiac hypertrophy and fibrosis in male GC-A KO mice without blood pressure change.	2003
ADAM metallopeptidase with thrombospondin type 1 motif 10(ADAMTS10)	11412379_12	marked fibrosis was found in the late stages (at 10 weeks postinfection) of cercariae-infected mice, but not in parasite egg implanted mice.	2001
ADAM metallopeptidase with thrombospondin type 1 motif 12(ADAMTS12)	2030926_2	To assess the role of tumor necrosis factor (TNF) and interleukin-1 (IL-1) in the pathophysiology of cystic fibrosis (CF)-associated growth failure/cachexia and lung disease we measured height, weight, triceps skin fold, forced vital capacity, forced expiratory volume in 1 second, and plasma levels of TNF, interleukin-1-alpha (IL-1 alpha), interleukin-1-beta (IL-1 beta), and alpha-1-antitrypsin (…	1991
ADAM metallopeptidase with thrombospondin type 1 motif 12(ADAMTS12)	3711930_3	In the first group of 10 males and 10 females, 8 males (at 8, 12, 20 and 30 weeks) and 4 females (at 12 and 30 weeks) showed severe limb muscle degeneration and inflammation with prominent regeneration and central nucleation of myofibres; fibrosis and fatty infiltration were not a feature.	1986
ADAM metallopeptidase with thrombospondin type 1 motif 13(ADAMTS13)	25113276_3	We hypothesized that systemic inflammation in cirrhosis is accompanied by a failure of ADAMTS13 to control the prothrombotic function of von Willebrand factor (VWF), which is increased in portal hypertension and hepatic fibrosis.	2014
ADAM metallopeptidase with thrombospondin type 1 motif 13(ADAMTS13)	21876190_4	RESULTS: Plasma ADAMTS13 activity significantly correlated with serum aspartate aminotransferase and alanine aminotransferase, liver stiffness value, and aspartate aminotransferase-to-platelet ratio index, irrespective of the presence of HCC, suggesting that it may reflect hepatocellular damage and subsequent wound healing and fibrosis as a result of hepatic stellate cell action.	2011
ADAM metallopeptidase with thrombospondin type 1 motif 13(ADAMTS13)	21876190_1	Prediction of hepatocellular carcinoma development by plasma ADAMTS13 in chronic hepatitis B and C. BACKGROUND: Chronic liver injury evokes a wound healing response, promoting fibrosis and finally hepatocellular carcinoma (HCC), in which hepatic stellate cells play an important role.	2011
ADAM metallopeptidase with thrombospondin type 1 motif 13(ADAMTS13)	20923926_16	Loss of ADAMTS13 and accumulation of VWF in fibrotic but not hyalinotic arteriolar walls could further propagate fibrosis in bN.	2010
ADAM metallopeptidase with thrombospondin type 1 motif 13(ADAMTS13)	20923926_6	Therefore, it is hypothesized that VWF cleaving protease ADAMTS13 (a disintegrin-like and metalloprotease with thrombospondin type-1 motif, 13) is normally expressed by arteriolar vascular smooth muscle cells (VSMCs) and diminished in bN and that this reduction contributes to fibrosis in bN.	2010
ADAM metallopeptidase with thrombospondin type 1 motif 13(ADAMTS13)	19652891_4	To further elucidate the potential contribution of hepatic stellate cells to the regulation of plasma ADAMTS13 activity, this study examined plasma ADAMTS13 activity when hepatic stellate cells proliferate during the process of liver fibrosis by employing rat models of liver fibrosis due to cholestasis, bile duct ligation, and steatohepatitis, a choline-deficient L-amino acid-defined-diet.	2009
ADAM metallopeptidase with thrombospondin type 1 motif 13(ADAMTS13)	16689760_2	INTRODUCTION: ADAMTS-13 is a member of A Disintegrin And Metalloprotease with ThromboSpondin type 1 repeats (ADAMTS) family, primarily synthesized in hepatic stellate cells (HSCs), one of the major cell types transdifferentiating into myofibroblasts during liver fibrosis.	2006
ADAM metallopeptidase with thrombospondin type 1 motif 13(ADAMTS13)	16689760_8	CONCLUSION: We conclude that the up-regulation of ADAMTS-13 protein expression in rat HSCs during activation in vitro and in vivo suggests the possibility of ADAMTS-13 proteolysis, an important part of function of the activated HSCs, perhaps through modulation of liver regeneration or formation of liver fibrosis after various injuries.	2006
ADAM metallopeptidase with thrombospondin type 1 motif 13(ADAMTS13)	16689760_3	However, the association between ADAMTS-13 expression and HSC activation or liver fibrosis is not known.	2006
ADAM metallopeptidase with thrombospondin type 1 motif 13(ADAMTS13)	15806136_9	Since hepatic stellate cells are believed to play a major role in the development of hepatic fibrosis and cirrhosis, the identification of the liver cell-type expressing ADAMTS13 will have important implications for understanding pathophysiological mechanisms regulating ADAMTS13 expression.	2005
ADAM metallopeptidase with thrombospondin type 1 motif 14(ADAMTS14)	17336841_13	Contraction and fibrosis may result from: (1) increased collagen biosynthesis mediated by increased ADAMTS-14; (2) an increased level of TIMP-1 blocking MMP-1- and MMP-13-mediated collagenolysis; and (3) contraction enabled by MMP-14-mediated pericellular collagenolysis (and potentially MMP-7), which may escape inhibition by TIMP-1.	2007
ADAM metallopeptidase with thrombospondin type 1 motif 2(ADAMTS2)	17929299_5	To evaluate the impact of ADAMTS2 on the pathological accumulation of extracellular matrix proteins, mainly type I and III collagens, we evaluated carbon tetrachloride-induced liver fibrosis in ADAMTS2-deficient (TS2(-/-)) and wild-type (WT) mice.	2007
ADAM metallopeptidase with thrombospondin type 1 motif 2(ADAMTS2)	15729469_4	The most significant findings included AIDS-defining disease (WPI 18.9% and NPI 13.5% of the cases), elevated hepatic enzyme levels (WPI: SGOT 52.1 and NPI 53.2), absence of liver disease-related symptoms (16.2% for both groups), average CD4 count > 350 for both groups (WPI 362.2 and NPI 378.1), predominantly low-grade fibrosis in both populations (0-2 in 63.6% of WPI patients and in 80% of NPI p…	2005
ADAM metallopeptidase with thrombospondin type 1 motif 4(ADAMTS4)	26503507_5	This analysis identified 58 transcripts that are associated with mild vs severe disease (categorical analysis), including those with established role in fibrosis (ADAMTS4, ADAMTS9, AGER, HIF-1\xce\xb1, SERPINA3, SERPINE2, and SELE) as well as novel IIP candidate genes such as rhotekin 2 (RTKN2) and peptidase inhibitor 15 (PI15).	2015
ADAM metallopeptidase with thrombospondin type 1 motif 5(ADAMTS5)	21337391_10	The cartilage protection provided by ADAMTS5 ablation in the mouse does not result from prevention of aggrecanase activity per se, but it appears to be due to a blockade of joint tissue fibrosis and a concomitant increase in cartilage aggrecan content.	2011
ADAM metallopeptidase with thrombospondin type 1 motif 5(ADAMTS5)	21337391_9	In the TTR model, ADAMTS5 ablation did not eliminate aggrecanase activity from the articular cartilage but blocked fibrosis and resulted in the accumulation of aggrecan in the articular cartilage.	2011
ADAM metallopeptidase with thrombospondin type 1 motif 5(ADAMTS5)	21337391_1	Knockout of ADAMTS5 does not eliminate cartilage aggrecanase activity but abrogates joint fibrosis and promotes cartilage aggrecan deposition in murine osteoarthritis models.	2011
ADAM metallopeptidase with thrombospondin type 1 motif 7(ADAMTS7)	25843683_10	These results suggest that ADAMTS7 is a new protease for CTGF protein and a novel regulator in the OC compartment, where its absence causes CTGF accumulation, leading to increased OC activation and biliary fibrosis.	2015
ADAM metallopeptidase with thrombospondin type 1 motif 9(ADAMTS9)	26503507_5	This analysis identified 58 transcripts that are associated with mild vs severe disease (categorical analysis), including those with established role in fibrosis (ADAMTS4, ADAMTS9, AGER, HIF-1\xce\xb1, SERPINA3, SERPINE2, and SELE) as well as novel IIP candidate genes such as rhotekin 2 (RTKN2) and peptidase inhibitor 15 (PI15).	2015
adaptor protein, phosphotyrosine interacting with PH domain and leucine zipper 1(APPL1)	17887888_3	(2006, "An Anisotropic Hyperelastic Constitutive Model With Fiber-Matrix Interaction for the Human Annulus Fibrosis," ASME J. Appl.	2007
adaptor related protein complex 2 alpha 1 subunit(AP2A1)	20351096_1	Alpha-AP-2 directs myosin VI-dependent endocytosis of cystic fibrosis transmembrane conductance regulator chloride channels in the intestine.	2010
adaptor related protein complex 3 beta 1 subunit(AP3B1)	22009278_13	These data show that children and young adults with HPS-2 and functional defects of the AP-3 complex are at risk for ILD and pulmonary fibrosis.	2011
adaptor related protein complex 3 beta 1 subunit(AP3B1)	21833017_6	HPS1 and HPS4 form a stable complex named biogenesis of lysosome-related organelles complex (BLOC)-3, and patients with BLOC-3 or AP-3 deficiency develop pulmonary fibrosis.	2011
adaptor related protein complex 3 beta 1 subunit(AP3B1)	20153726_8	The results of the present study indicate that ALA inhibits hepatic PAI-1 expression through inhibition of TGF-beta-mediated molecular mediators, including Smad3, AP1, and Sp1, and prevents the development of BDL-induced hepatic fibrosis.	2010
adaptor related protein complex 3 beta 1 subunit(AP3B1)	15760680_9	In conclusion, our results indicate the possibility that NF-kappa B, STAT3, and AP1 binding by signals transduced through TNFR-1 plays an important role in liver fibrosis formation.	2005
adaptor related protein complex 4 beta 1 subunit(AP4B1)	26006229_1	Potential role of thymosin Beta 4 in liver fibrosis.	2015
adaptor related protein complex 4 beta 1 subunit(AP4B1)	26098610_1	Effects of thymosin \xce\xb24 and its N-terminal fragment Ac-SDKP on TGF-\xce\xb2-treated human lung fibroblasts and in the mouse model of bleomycin-induced lung fibrosis.	2015
adaptor related protein complex 4 beta 1 subunit(AP4B1)	26231377_10	Fibrosis was associated with 57% lower plasma 4\xce\xb2-hydroxycholesterol levels than controls.	2015
adaptor related protein complex 4 beta 1 subunit(AP4B1)	26096077_3	A promising avenue may be manipulating thymosin-\xce\xb24, a naturally occurring peptide, which is the major G-actin sequestering protein in mammalian cells and a regulator of inflammation and fibrosis.	2015
adaptor related protein complex 4 beta 1 subunit(AP4B1)	25433338_7	Our data indicate that the interaction between the \xce\xb14\xce\xb21 integrin and the EDA domain of fibronectin helps to drive tissue fibrosis by promoting a contractile phenotype and an increase in fibronectin synthesis and deposition.	2014
adaptor related protein complex 4 beta 1 subunit(AP4B1)	24526353_13	Cardiac-specific overexpression of ZAKI-4\xce\xb2, an endogenous inhibitor of CnA, significantly suppressed the enhancement of TAC-induced cardiac hypertrophy and dysfunction, as well as increases in cardiac fibrosis and apoptosis, in Murf1(-/-) mice.	2014
adaptor related protein complex 4 beta 1 subunit(AP4B1)	23820300_7	Thus, thymosin \xce\xb24-sulfoxide is a putative target for therapeutic modulation of the immune response, resolution of fibrosis and cardiac repair.	2013
adaptor related protein complex 4 beta 1 subunit(AP4B1)	23739235_1	Thymosin \xce\xb24 and its degradation product, Ac-SDKP, are novel reparative factors in renal fibrosis.	2013
adaptor related protein complex 4 beta 1 subunit(AP4B1)	24349537_1	Integrin \xce\xb16\xce\xb24 identifies human distal lung epithelial progenitor cells with potential as a cell-based therapy for cystic fibrosis lung disease.	2013
adaptor related protein complex 4 beta 1 subunit(AP4B1)	23050822_1	Development of an analytical HPLC methodology to study the effects of thymosin \xce\xb24 on actin in sputum of cystic fibrosis patients.	2012
adaptor related protein complex 4 beta 1 subunit(AP4B1)	23045971_2	Thymosin \xce\xb24 (T\xce\xb24) plays a role in fibrosis, inflammation, and in the reparative process of injured cells and tissues.	2012
adaptor related protein complex 4 beta 1 subunit(AP4B1)	23045975_1	Thymosin \xce\xb24 and cardiac protection: implication in inflammation and fibrosis.	2012
adaptor related protein complex 4 beta 1 subunit(AP4B1)	23045972_2	Thymosin \xce\xb24 (T\xce\xb24) has been found to have several biological activities related to antiscarring and reduced fibrosis.	2012
adaptor related protein complex 4 beta 1 subunit(AP4B1)	23045972_1	Protective effects of thymosin \xce\xb24 in a mouse model of lung fibrosis.	2012
adaptor related protein complex 4 beta 1 subunit(AP4B1)	21625516_10	Thymosin beta4 (T\xce\xb24), an effective cell penetrating peptide for treating MI, was found to further enhance the level of PIP components and Akt activation, while substantially suppressing NF-\xce\xbaB activation and collagen expression--the hallmarks of cardiac fibrosis.	2011
adaptor related protein complex 4 beta 1 subunit(AP4B1)	21445273_9	Further, markers of cardiomyocyte reactive hypertrophy, including mRNA levels for K-channel \xce\xb1-subunit Kv1.4 and \xce\xb2-subunit KChIP2, interstitial fibrosis and negative structural remodeling were significantly reduced in peri-infarcted/remote ventricular myocardium.	2011
adaptor related protein complex 4 beta 1 subunit(AP4B1)	22073372_2	Thymosin beta-4 (T\xce\xb24) is a member of beta-thymosins, a family of small peptides involved in polymerization of G-actin, and in many critical biological processes including apoptosis, cell migration, angiogenesis, and fibrosis.	2011
adaptor related protein complex 4 beta 1 subunit(AP4B1)	22074294_6	Thymosin \xce\xb2(4) also decreases the number of myofibroblasts in wounds, resulting in decreased scar formation and fibrosis.	2011
adaptor related protein complex 4 beta 1 subunit(AP4B1)	22144828_1	\xce\xb14\xce\xb21 integrin-dependent cell sorting dictates T-cell recruitment in oral submucous fibrosis.	2011
adaptor related protein complex 4 beta 1 subunit(AP4B1)	17584975_4	In this communication we investigated whether thymosin beta(4) (Tbeta(4)), an actin-sequestering peptide that prevents scarring of the heart after a myocardial infarction and that prevents kidney fibrosis in animals, has the potential to be used to treat liver fibrosis.	2007
adaptor related protein complex 4 beta 1 subunit(AP4B1)	17496063_1	The role of DNA and actin polymers on the polymer structure and rheology of cystic fibrosis sputum and depolymerization by gelsolin or thymosin beta 4.	2007
adaptor related protein complex 4 beta 1 subunit(AP4B1)	17099021_1	Thymosin beta4 sequesters actin in cystic fibrosis sputum and decreases sputum cohesivity in vitro.	2006
adaptor related protein complex 4 beta 1 subunit(AP4B1)	16990104_4	Many of the distinctive histologic features of HCL can be related to constitutive production of cytokines (eg, FGF, fibrosis) and to the expression/activation of adhesion receptors (eg, alpha(4)beta(1), alpha(5)beta(1) and alpha(v)beta(3) integrins, CD44v3).	2006
adaptor related protein complex 4 beta 1 subunit(AP4B1)	9031327_1	Increased expression of intercellular adhesion molecule 1, CD11/CD18 cell surface adhesion glycoproteins and alpha 4 beta 1 integrin in a rat model of chronic interstitial lung fibrosis.	1996
adaptor related protein complex 4 beta 1 subunit(AP4B1)	7478922_2	The human colonic carcinoma cell line HT-29cl.19A responds to the protein kinase C activator PDB (4-beta-phorbol 12,13-dibutyrate), as it does to forskolin (an activator of adenylyl cyclase), with a secretory response when the cells are grown on filters and studied at 36 degrees C. Previously, we showed that when cells were grown on Petri dishes and studied at about 25 degrees C with the cell-att…	1995
adaptor related protein complex 4 beta 1 subunit(AP4B1)	7513122_2	We have previously shown that fibroblasts from patients with cystic fibrosis (CF) display a higher response to 4 beta-phorbol 12-myristate 13-acetate (PMA) than control fibroblasts for stimulation of both protein kinase C (PKC) cytosol-to-membrane translocation and glycoconjugate secretion.	1994
adaptor related protein complex 4 beta 1 subunit(AP4B1)	1964813_2	In comparison to skin fibroblasts from normal subjects, those from patients with cystic fibrosis (CF): (1) bound [20-3H] phorbol 12,13-dibutyrate (PDBu) with a higher affinity Kd = 25.8 vs 12.8 nM respectively) but expressed a similar number of total phorbol ester binding sites (about 2.5 pmol PDBu bound/mg of protein); (2) exhibited a faster and higher response to 4 beta-phorbol 12 beta-myristat…	1990
adaptor related protein complex 4 beta 1 subunit(AP4B1)	3345834_2	The ability of the tumor-promoting phorbol ester 4 beta-phorbol 12 beta-myristate 13 alpha-acetate (PMA) to induce protein kinase C (PKC) translocation and lysosomal enzyme release was examined in skin fibroblasts from normal subjects and from patients with cystic fibrosis (CF).	1988
adaptor related protein complex 4 mu 1 subunit(AP4M1)	25882295_3	4-Methylumbelliferone (4MU) is an inhibitor of HA synthesis and has anticancer activity in an orthotopic HCC model with underlying fibrosis.	2015
adaptor related protein complex 4 mu 1 subunit(AP4M1)	23192162_5	Liver fibrosis was induced in the fibrosis group through subcutaneous injection of 1:3 mixture of carbon tetrachloride (CCl(4)) in olive oil at a dose of 4 \xce\xbcL/g of body weight twice a week for 8 weeks.	2012
adaptor related protein complex 4 mu 1 subunit(AP4M1)	22038477_14	In conclusion, our results suggest a role for 4-MU as an anticancer agent for HCC associated with advanced fibrosis.	2011
adaptor related protein complex 4 mu 1 subunit(AP4M1)	22038477_12	Animals treated with 4-MU developed a reduced fibrosis degree compared with controls (F1-2 vs F2-3, respectively).	2011
adaptor related protein complex 4 mu 1 subunit(AP4M1)	15677859_3	METHODS: Renal interstitial fibrosis was induced in rats by administration of the Mu-Tong solution intragastrically for 6 weeks, and 36 rats were randomly divided into six groups: (1) Mu-Tong, (2) Mu-Tong + captopril, (3) Mu-Tong + losartan, (4) Mu-Tong + simvastatin, (5) Mu-Tong + spironolactone, and (6) Mu-Tong + diammonium glycyrrhizinate.	2005
additional sex combs like 1, transcriptional regulator(ASXL1)	26565403_6	Risk factors cited for post-PV MF include advanced age, leukocytosis, reticulin fibrosis, splenomegaly and JAK2V617F allele burden and for post-ET MF include advanced age, leukocytosis, anemia, reticulin fibrosis, absence of JAK2V617F, use of anagrelide and presence of ASXL1 mutation.	2015
adenine phosphoribosyltransferase(APRT)	19159945_2	Adenine phosphoribosyltransferase deficiency in mice or an excessive oral intake of adenine leads to the accumulation of 2,8-dihydroxyadenine (DHA) in renal tubules and that causes progressive renal dysfunction accompanied by interstitial fibrosis.	2009
adenine phosphoribosyltransferase(APRT)	1353080_8	Distribution of mutant alleles encoding APRT deficiency among the Japanese was similar to that seen in cystic fibrosis genes among Caucasians and Tay-Sachs genes among the Ashkenazi Jews.	1992
adenosine A1 receptor(ADORA1)	22956627_3	The A(1) adenosine receptor (A(1)AR) was postulated to participate in the pathogenesis of hepatic fibrosis induced by experimental extrahepatic cholestasis; however, the contribution of A(1)AR to intrahepatic cholestatic liver injury remains unknown.	2012
adenosine A1 receptor(ADORA1)	20007753_2	Mice lacking A(1) adenosine receptors (A(1)AR) were thought to be protected from developing fatty liver; however, the contribution of A(1)AR to hepatic fibrosis has not been explored.	2009
adenosine A1 receptor(ADORA1)	20007753_1	A contradictory role of A1 adenosine receptor in carbon tetrachloride- and bile duct ligation-induced liver fibrosis in mice.	2009
adenosine A1 receptor(ADORA1)	18689466_13	However, an additional component of AFC impairment was due to activation of A(1) adenosine receptors and stimulation of increased cystic fibrosis transmembrane regulator-mediated anion secretion.	2008
adenosine A1 receptor(ADORA1)	9694345_2	8-Cyclopentyl-1,3-dipropylxanthine (CPX) is a selective A1-adenosine receptor antagonist which has been reported to activate Cl- efflux at very low concentrations in cells carrying the cystic fibrosis (CF) defect, but not in cells expressing the wild-type form of the CF transmembrane conductance regulator (CFTR).	1998
adenosine A1 receptor(ADORA1)	7611373_1	Identification and function of A1 adenosine receptors in normal and cystic fibrosis human airway epithelial cells.	1995
adenosine A1 receptor(ADORA1)	7543243_1	CPX, a selective A1-adenosine-receptor antagonist, regulates intracellular pH in cystic fibrosis cells.	1995
adenosine A1 receptor(ADORA1)	7543243_2	The selective A1-adenosine-receptor antagonist, 8-cyclopentyl-1,3-dipropylxanthine (CPX), has been reported to activate Cl- efflux from cystic fibrosis cells, such as pancreatic CFPAC-1 and lung IB3 cells bearing the cystic fibrosis transmembrane regulator(delta F508) mutation, but has little effect on the same process in cells repaired by transfection with wild-type cystic fibrosis transmembrane…	1995
adenosine A1 receptor(ADORA1)	8227038_1	ATP and A1 adenosine receptor agonists mobilize intracellular calcium and activate K+ and Cl- currents in normal and cystic fibrosis airway epithelial cells.	1993
adenosine A1 receptor(ADORA1)	1376923_1	A1 adenosine-receptor antagonists activate chloride efflux from cystic fibrosis cells.	1992
adenosine A2a receptor(ADORA2A)	24682220_3	Evidence suggests that adenosine aggravates liver fibrosis via the adenosine A2A receptor (A2AR).	2014
adenosine A2a receptor(ADORA2A)	24200882_2	Activation of adenosine A2A receptor (A2AR) promotes fibrosis and collagen synthesis.	2013
adenosine A2a receptor(ADORA2A)	23874883_11	A2AR antagonism may be a potential pharmaceutical intervention to decrease hepatic fibrosis in response to ethanol.	2013
adenosine A2a receptor(ADORA2A)	24266925_2	Adenosine has an important role in inflammation and tissue remodeling and promotes dermal fibrosis by adenosine receptor (A2AR) activation.	2013
adenosine A2a receptor(ADORA2A)	23874883_9	Treatment with A2AR antagonist both prevented and reversed the ability of ethanol to exacerbate liver fibrosis.	2013
adenosine A2a receptor(ADORA2A)	23874883_4	Adenosine 2A receptor (A2AR) activation is known to enhance hepatic stellate cell (HSC) activation and A2AR deficient mice are protected from fibrosis in mice.	2013
adenosine A2a receptor(ADORA2A)	23874883_5	Making use of a novel mouse model of moderate ethanol consumption in which female C57BL/6J mice were allowed continued access to 2% (vol/vol) ethanol (11% calories) or pair-fed control diets for 2 days, 2 weeks or 5 weeks and superimposed with exposure to CCl4, we tested the hypothesis that moderate ethanol consumption increases fibrosis in response to carbon tetrachloride (CCl4) and that treatme…	2013
adenosine A2a receptor(ADORA2A)	23026406_2	Adenosine A2A receptor (A2AR) plays an important regulatory role in the processes of inflammation and fibrosis.	2012
adenosine A2a receptor(ADORA2A)	23026406_3	However, it is unknown whether A2AR can mediate renal interstitial fibrosis (RIF).	2012
adenosine A2a receptor(ADORA2A)	22767233_2	Adenosine A2A receptor (A2AR) stimulation promotes wound healing and is required for the development of fibrosis in murine models of scleroderma and cirrhosis.	2012
adenosine A2a receptor(ADORA2A)	22033526_3	Adenosine A2A receptor stimulation (A2Ar) promotes dermal fibrosis, while the cannabinoid system modulates fibrogenesis in vitro and in animal models of SSc.	2011
adenosine A2a receptor(ADORA2A)	8032638_24	In conclusion, our results suggest that A2AR participates in regulation of airway C1 secretion via aCa2+-dependent signalling pathway, which involves CaMK and appears to be at least partially conserved in cystic fibrosis airway epithelial cells.	1994
adenosine A2b receptor(ADORA2B)	25318478_10	Adora2B(f/f)-LysM(Cre) mice presented with attenuated fibrosis, improved lung function, and no evidence of PH compared with control mice exposed to BLM.	2014
adenosine A2b receptor(ADORA2B)	25318478_13	These data suggest that activation of the ADORA2B on macrophages plays an active role in the pathogenesis of lung fibrosis and PH.	2014
adenosine A2b receptor(ADORA2B)	25318478_1	Deletion of ADORA2B from myeloid cells dampens lung fibrosis and pulmonary hypertension.	2014
adenosine A2b receptor(ADORA2B)	24120874_3	Adenosine via the A2B adenosine receptor (A2BAdoR) has been implicated in promoting fibrosis.	2013
adenosine A2b receptor(ADORA2B)	21511827_4	Both the administration of polyethylene glycol-modified ADA to reduce adenosine levels and the inhibition of the A(2B) adenosine receptor (A(2B)R) attenuated renal fibrosis and dysfunction.	2011
adenosine A2b receptor(ADORA2B)	19639288_3	The A(2B) adenosine receptor (A(2B)AR) is the predominant P1 purinergic receptor isoform expressed in surface airway epithelia, and Ado is an important regulator of airway surface liquid (ASL) volume through its activation of the cystic fibrosis transmembrane conductance regulator (CFTR).	2009
adenosine A2b receptor(ADORA2B)	19858092_13	Increased adenosine contributes to penile fibrosis, a dangerous feature of priapism, via A(2B) adenosine receptor signaling.	2009
adenosine A2b receptor(ADORA2B)	19858092_1	Increased adenosine contributes to penile fibrosis, a dangerous feature of priapism, via A2B adenosine receptor signaling.	2009
adenosine A2b receptor(ADORA2B)	15210701_3	Extracellular adenine nucleotides also serve as precursors for adenosine, which promotes cyclic AMP-mediated activation of the cystic fibrosis transmembrane regulator chloride channel via A(2b) adenosine receptors.	2004
adenosine A2b receptor(ADORA2B)	12714375_2	We investigated cystic fibrosis transmembrane conductance regulator (CFTR) activation by clinically used phosphodiesterase inhibitors (PDEis) in Calu-3 cell monolayers alone and in combination with A2B adenosine receptor stimulation.	2003
adenosine A2b receptor(ADORA2B)	12570760_6	Hence, A(2B) adenosine receptor agonists could be useful in the treatment of cardiac diseases like hypertension or myocardial infarction and in the management of septic shock, while antagonists may serve as novel drugs for asthma, Alzheimer's disease, cystic fibrosis and type-II diabetes.	2003
adenosine deaminase(ADA)	25229687_15	We analyzed the serum ADA activity in groups of individuals with altered nutritional status evaluated through different markers--young adult patients with Nervous Anorexia, overweight or obese school children, children suffering cystic fibrosis.	2014
adenosine deaminase(ADA)	24973264_3	Multiple guidelines have been published over the last few years for the diagnosis and management of CFRD, from the American Diabetes Association (ADA) / US Cystic Fibrosis Foundation, International Society for Pediatric and Adolescent Diabetes (ISPAD) and the Thoracic Society of Australia and New Zealand-Australian Diabetes Society.	2014
adenosine deaminase(ADA)	21511827_4	Both the administration of polyethylene glycol-modified ADA to reduce adenosine levels and the inhibition of the A(2B) adenosine receptor (A(2B)R) attenuated renal fibrosis and dysfunction.	2011
adenosine deaminase(ADA)	21511827_3	Here, mice with chronically elevated levels of adenosine, resulting from a deficiency in adenosine deaminase (ADA), developed renal dysfunction and fibrosis.	2011
adenosine deaminase(ADA)	20306914_6	Inflammation (p = 0.023) and fibrosis (p = 0.019) scores were lower in just the ADA group when compared to the control group.	2010
adenosine deaminase(ADA)	19858092_7	An important finding is that chronic reduction of adenosine by ADA enzyme therapy successfully attenuated penile fibrosis in both mouse models, indicating an essential role of increased adenosine in penile fibrosis and a novel therapeutic possibility for this serious complication.	2009
adenosine deaminase(ADA)	19858092_6	Here we demonstrate that increased adenosine is a novel causative factor contributing to penile fibrosis in two independent animal models of priapism, adenosine deaminase (ADA)-deficient mice and SCD transgenic mice.	2009
adenosine deaminase(ADA)	18467695_7	Pharmacological treatment of ADA-deficient mice with the A(2A) receptor antagonist ZM-241385 prevented the development of dermal fibrosis in this model of elevated tissue adenosine, by reducing dermal collagen content and expression of profibrotic cytokines and growth factors.	2008
adenosine deaminase(ADA)	18467695_6	Taking advantage of genetically modified ADA-deficient mice, we herein report a direct fibrogenic effect of adenosine on the skin, in which increased collagen deposition is accompanied by increased levels of key mediators of fibrosis, including transforming growth factor beta1, connective tissue growth factor, and interleukin-13.	2008
adenosine deaminase(ADA)	18467695_4	Adenosine deaminase (ADA) is the principal catabolic enzyme for adenosine in vivo, and its deficiency leads to the spontaneous development of pulmonary fibrosis in mice.	2008
adenosine deaminase(ADA)	18615449_11	AdasSPARC markedly attenuated the development of hepatic fibrosis in rats treated with thiocetamide, as assessed by decreased collagen deposition, lower hepatic content of hydroxyproline and less advanced morphometric stage of fibrosis.	2008
adenosine deaminase(ADA)	16670768_8	Treatment with ADA also reduced the inflammation, fibrosis, and emphysematous destruction and improved the survival of C57BL/6 Tg animals.	2006
adenosine deaminase(ADA)	16841096_5	To investigate the role of the A2BAR in vivo, ADA-deficient mice were treated with the selective A2BAR antagonist CVT-6883, and pulmonary inflammation, fibrosis, and airspace integrity were assessed.	2006
adenosine deaminase(ADA)	16841096_6	Untreated and vehicle-treated ADA-deficient mice developed pulmonary inflammation, fibrosis, and enlargement of alveolar airspaces; conversely, CVT-6883-treated ADA-deficient mice showed less pulmonary inflammation, fibrosis, and alveolar airspace enlargement.	2006
adenosine deaminase(ADA)	16034138_1	Adenosine-dependent pulmonary fibrosis in adenosine deaminase-deficient mice.	2005
adenosine deaminase(ADA)	16034138_11	These findings demonstrate that chronic adenosine elevations are associated with pulmonary fibrosis in ADA-deficient mice and suggest that the adenosine functions as a profibrotic signal in the lung.	2005
adenosine deaminase(ADA)	16258000_1	Partially adenosine deaminase-deficient mice develop pulmonary fibrosis in association with adenosine elevations.	2005
adenosine deaminase(ADA)	16258000_5	The present study describes the development of pulmonary fibrosis in mice that have been genetically engineered to possess partial ADA enzyme activity and, thus, accumulate adenosine over a prolonged period of time.	2005
adenosine deaminase(ADA)	16258000_7	Detailed investigations of the lung histopathology of partially ADA-deficient mice revealed progressive pulmonary fibrosis marked by an increase in the number of pulmonary myofibroblasts and an increase in collagen deposition.	2005
adenosine deaminase(ADA)	12897202_8	ADA enzyme therapy diminished the IL-13-induced increase in adenosine, inhibited IL-13-induced inflammation, chemokine elaboration, fibrosis, and alveolar destruction, and prolonged the survival of IL-13-transgenic animals.	2003
adenosine deaminase(ADA)	9588249_11	Preliminary clinical trials have targeted diseases such as ADA deficiency, familial hypercholesterolemia, and cystic fibrosis.	1998
adenosine deaminase(ADA)	9588249_2	Human gene therapy trials directed at hereditary diseases, including adenosine deaminase (ADA) deficiency, familial hypercholesterolemia, and cystic fibrosis, are reviewed.	1998
adenosine deaminase(ADA)	9857368_3	Clinical trials involving approximately 2000 patients worldwide have targeted simple genetic diseases such as cystic fibrosis, muscular dystrophy, adenosine deaminase deficiency, Gaucher's disease and familial hypercholesterolemia, as well as complex acquired diseases such as cancer and AIDS.	1998
adenosine deaminase(ADA)	9633852_2	Originally conceived and applied for the treatment of inherited monogenetic defects such as adenosine deaminase deficiency and cystic fibrosis, gene therapy was later applied to the treatment of cancer.	1998
adenosine deaminase(ADA)	8424431_3	High serum ADA activities were found in patients with acute hepatitis, alcoholic hepatic fibrosis, chronic active hepatitis, liver cirrhosis, and hepatoma.	1993
adenosine deaminase(ADA)	1190732_3	The data exclude that ADA belongs to this linkage group while they give weak support for the inclusion of P. There is weak evidence for linkage of cystic fibrosis to PGM3, but none for linkage to HL-A.	1975
adenosine deaminase, RNA specific B2 (inactive)(ADARB2)	23527815_8	The HSC-targeted transgene, administered via retrograde intrabiliary infusion in fibrotic rats, successfully reduced liver fibrosis markers alpha-smooth muscle actin and collagen, accompanied by an increase in the expression of DsRed2-HGF near the fibrotic foci.	2013
adenosine deaminase, RNA specific(ADAR)	26453800_8	We found that Alb-ADAR1(KO) mice showed dramatic growth retardation and high mortality because of severe structural and functional damage to the liver, which showed overwhelming inflammation, cell death, fibrosis, fatty change, and compensatory regeneration.	2015
adenosine kinase(ADK)	14586729_10	Concomitantly with the preservation of renal function, pathological indices, including the glomerular sclerosis index and the interstitial fibrosis index, were significantly improved in ADK compared with AD.	2003
adenosylhomocysteinase like 1(AHCYL1)	24518248_3	Unexpectedly, many functions have subsequently been identified for IRBIT including the activation of multiple ion channels and ion transporters, such as the Na(+)/HCO3(-) co-transporter NBCe1-B, the Na(+)/H(+) exchanger NHE3, the Cl(-) channel cystic fibrosis transmembrane conductance regulator (CFTR), and the Cl(-)/HCO3(-) exchanger Slc26a6.	2014
adenosylhomocysteinase like 1(AHCYL1)	19033647_9	These findings define IRBIT as a key coordinator of epithelial fluid and HCO3- secretion and may have implications to all CFTR-expressing epithelia and to cystic fibrosis.	2008
adenylate cyclase 10, soluble(ADCY10)	25592273_10	Treated animals had less acute and chronic inflammation throughout the study period, and we observed increasing fibrosis of the aneurysm sac, no accumulation of calcium, and a regeneration of elastic fibers in the artery.	2015
adenylate cyclase 10, soluble(ADCY10)	26060347_6	SAC or other cysteine compounds were administered from 4 weeks when liver fibrosis was confirmed to be in process.	2015
adenylate cyclase 10, soluble(ADCY10)	24609870_7	Morphologic responses of IAAA to EVAR were reviewed by measuring the changes in aneurysm sac maximum diameter (mm), periaortic fibrosis (PAF) thickness (mm), and PAF enhancement (Hounsfield units [HU] on delayed CTA) on serial images.	2014
adenylate cyclase 10, soluble(ADCY10)	25018880_9	In the histopathological evaluations of the samples collected from the lacrimal sac wall, chronic inflammation was found in all biopsied samples and fibrosis was observed in two histopathological evaluations.	2014
adenylate cyclase 10, soluble(ADCY10)	25255576_7	RESULT: Structural changes were found in the experimental (5-fluorouracil) group compared to the controls, including abnormal alveolar duct, sac, and terminal bronchioles with emphysematous changes in most of the alveoli in addition to peribronchiolitis, perivasculitis, inflammatory cells infiltration and interstitial fibrosis.	2014
adenylate cyclase 10, soluble(ADCY10)	24598307_1	Cystic fibrosis transmembrane conductance regulator in the endolymphatic sac of the rat.	2014
adenylate cyclase 10, soluble(ADCY10)	24598307_5	In this study, we confirmed the expression of cystic fibrosis transmembrane conductance regulator (CFTR) in the endolymphatic sac by reverse transcriptase polymerase chain reaction (RT-PCR) and by immunohistochemical staining.	2014
adenylate cyclase 10, soluble(ADCY10)	24392331_10	CONCLUSION: Non-specific chronic inflammation with fibrosis is indeed the most commonly reported histopathological finding in lacrimal sac wall biopsy specimens.	2014
adenylate cyclase 10, soluble(ADCY10)	23065164_9	Deep (solid infiltrating) endometriosis can involve the pelvic ligaments, anterior rectosigmoid colon, bladder, uterus, and cul-de-sac, as well as surgical scars; the lesions often have poorly defined margins and T2 signal hypointensity as a result of fibrosis.	2012
adenylate cyclase 10, soluble(ADCY10)	22127348_1	Bleomycin-induced pulmonary fibrosis after tumor lysis syndrome in a case of advanced yolk sac tumor treated with bleomycin, etoposide and cisplatin (BEP) chemotherapy.	2011
adenylate cyclase 10, soluble(ADCY10)	21921998_8	CONCLUSION: The described sonographic signs, two static and the other dynamic, may help basic minimal invasive gynecological surgeons who do not have advanced laparoscopic skills and do not feel comfortable dealing with an obliterated anterior cul-de-sac or dense vesico-uterine space fibrosis predict the presence of dense vesico-uterine adhesions allowing them to choose another route that they ma…	2011
adenylate cyclase 10, soluble(ADCY10)	21264538_2	The most common lacrimal sac pathology is chronic inflammation with or without occlusive fibrosis.	2011
adenylate cyclase 10, soluble(ADCY10)	21921998_4	RESULTS: Ultrasonography showed a spectrum of changes from obliterated anterior cul-de-sac to dense fibrosis between the lower uterine segment and cervix with the bladder.	2011
adenylate cyclase 10, soluble(ADCY10)	21030893_16	This result suggests that AS-related CES may be due to chronic arachnoiditis and dural fibrosis leading to diminished CSF resorption with dural sac dilation and diverticula formation.	2010
adenylate cyclase 10, soluble(ADCY10)	20812824_8	CONCLUSIONS: Chronic inflammation and fibrosis are the most common histopathologic findings in lacrimal sac specimens obtained during DCR.	2010
adenylate cyclase 10, soluble(ADCY10)	20302403_4	Frequency of putting eye make-up (PANDO versus normal females), level of sexual hormones consisting of follicular stimulating hormone (FSH), luteal hormone (LH), estradiol, progesterone and testosterone (standard laboratory level), lacrimal sac biopsy for inflammation and fibrosis and immunohistochemistry for herpes simplex virus (HSV) type 1 and 2, and human papilloma virus were recorded.	2010
adenylate cyclase 10, soluble(ADCY10)	20302403_6	Patients with severe preoperative symptoms showed significantly more lacrimal sac fibrosis (P = 0.018).	2010
adenylate cyclase 10, soluble(ADCY10)	20088405_16	SAC could provide a new therapeutic strategy for hepatic fibrosis.	2010
adenylate cyclase 10, soluble(ADCY10)	20088405_15	CONCLUSIONS: Oral administration of SAC reduced PS-induced hepatic fibrosis in rats via inhibition of HSC activation.	2010
adenylate cyclase 10, soluble(ADCY10)	20088405_13	SAC and NAC each markedly attenuated the development ofhepatic fibrosis.	2010
adenylate cyclase 10, soluble(ADCY10)	21035697_6	Primary endpoints were aneurysm-related mortality, aneurysm sac evolution, perianeurysmal fibrosis (PAF) thickness, and hydronephrosis progression.	2010
adenylate cyclase 10, soluble(ADCY10)	19118702_15	In the E-DCR group, lacrimal passage reconstruction failed because of intranasal ostial closure in 3 patients, lacrimal sac fibrosis, granulation, or both in 6 patients, and common canaliculus obstruction in 2 patients.	2009
adenylate cyclase 10, soluble(ADCY10)	18689412_6	We then generated antibodies specific for tilapia NKCC1a and NCC and conducted whole-mount immunofluorescence staining for NKCC1a and NCC, together with Na(+)/K(+)-ATPase, cystic fibrosis transmembrane conductance regulator (CFTR) and Na(+)/H(+) exchanger 3 (NHE3), on the yolk-sac membrane of tilapia embryos acclimatized to freshwater or seawater.	2008
adenylate cyclase 10, soluble(ADCY10)	16614485_2	This study examined effects of S-allyl cysteine (SAC) on carbon tetrachloride (CCl4)-induced interstitial pulmonary fibrosis in Wistar rats.	2006
adenylate cyclase 10, soluble(ADCY10)	17107527_6	All patients have (i) the presence of a well-defined midline septum in the sagittal plane that splits the thecal sac, usually symmetrically, in the lower lumbar or sacral region, below the level of the spinal cord; (ii) the absence of adjacent epidural fibrosis that one would expect if the septation had been caused by surgical intervention or trauma; (iii) the preservation of cerebrospinal fluid …	2006
adenylate cyclase 10, soluble(ADCY10)	16554594_3	CONCLUSION: Endovascular aneurysm repair of inflammatory aortic aneurysms excludes the aneurysm and seems to reduce the size of the aneurysmal sac and the extent of periaortic fibrosis with acceptable periinterventional and long-term morbidity.	2006
adenylate cyclase 10, soluble(ADCY10)	16953162_22	Fibrosis and calcifications were also detected within the sac, mostly around the stent-graft and in contact with the aortic wall starting at 4 weeks.	2006
adenylate cyclase 10, soluble(ADCY10)	16614485_8	Although NAC and CYS attenuated CCl4-induced pulmonary inflammation and fibrosis, the order of preventive potency was SAC > NAC > CYS according to their applied doses.	2006
adenylate cyclase 10, soluble(ADCY10)	16614485_9	These results indicate that SAC is more effective than other cysteine compounds in reducing CCl4-induced lung injury, and might be useful in prevention of interstitial pulmonary fibrosis.	2006
adenylate cyclase 10, soluble(ADCY10)	16803704_7	Prompt diagnosis and treatment with corticosteroids and penicillin are mandatory to reduce the immune response and fibrosis of the labyrinth and the endolymphatic sac.	2006
adenylate cyclase 10, soluble(ADCY10)	16614485_6	SAC dose-dependently and significantly attenuated CCl4-induced systemic inflammation and fibrosis of lung.	2006
adenylate cyclase 10, soluble(ADCY10)	15914646_2	Mozambique tilapia Oreochromis mossambicus embryos were transferred from freshwater to seawater and vice versa, and short-term changes in the localization of three major ion transport proteins, Na+/K+-ATPase, Na+/K+/2Cl- cotransporter (NKCC) and cystic fibrosis transmembrane conductance regulator (CFTR) were examined within mitochondrion-rich cells (MRCs) in the embryonic yolk-sac membrane.	2005
adenylate cyclase 10, soluble(ADCY10)	16215213_3	To evaluate the ion-transporting property of the yolk balls, we examined Cl- content and turnover in yolk balls incubated in freshwater and seawater for 48 h, and distribution patterns of three ion transporters, Na+/K+-ATPase, Na+/K+/2Cl- cotransporter (NKCC) and cystic fibrosis transmembrane conductance regulator (CFTR), in MRCs in the yolk-sac membrane.	2005
adenylate cyclase 10, soluble(ADCY10)	16216089_4	To be included in the analysis, an article had to provide a minimum follow-up of 6 months, information about primary technical success, details of immediate and long-term complications, and evaluation of at least one of the basic outcome criteria: changes in aneurysm sac diameter, periaortic fibrosis (PAF), and/ or renal impairment.	2005
adenylate cyclase 10, soluble(ADCY10)	15872330_3	At a mean follow-up of 33 months, regression of the thickness of the perianeurysmal fibrosis (PAF) and decrease of aneurysmal sac diameter was observed in nine patients.	2005
adenylate cyclase 10, soluble(ADCY10)	15117409_3	HCO3- activates sAC in bovine corneal endothelial cells (BCECs), increasing [cAMP] and stimulating PKA, leading to phosphorylation of the cystic fibrosis transmembrane-conductance regulator (CFTR) and increased apical Cl- permeability.	2004
adenylate cyclase 10, soluble(ADCY10)	14625496_6	Histopathologic examination of the lacrimal sac and nasal mucosa revealed foreign-body reaction and fibrosis with no malignant cells.	2003
adenylate cyclase 10, soluble(ADCY10)	14665362_8	The pathologic findings in the 18 patients undergoing postchemotherapy RPLND revealed fibrosis in 8, teratoma in 9, and yolk sac tumor in 1.	2003
adenylate cyclase 10, soluble(ADCY10)	11935070_9	RESULTS: Despite loose packing of aneurysms with BPMs, faster BPMs such as 50/50 or 65/35 PLGA demonstrated more mature collagen formation and fibrosis in the sac and neck of the aneurysm.	2002
adenylate cyclase 10, soluble(ADCY10)	12492790_2	Of late, regional anesthesia has enjoyed unprecedented popularity; this increase in cases has brought a higher frequency of instances of neurological deficit and arachnoiditis that may appear as transient nerve root irritation, cauda equina, and conus medullaris syndromes, and later as radiculitis, clumped nerve roots, fibrosis, scarring dural sac deformities, pachymeningitis, pseudomeningocele, …	2002
adenylate cyclase 10, soluble(ADCY10)	11913684_3	This finding coincided with total or partial occlusion of numerous small vessels around the endolymphatic sac (ES), flattening of epithelium, extensive perisaccular fibrosis, and signs of new bone formation.	2002
adenylate cyclase 10, soluble(ADCY10)	12096940_2	PURPOSE: To report a single-center experience with endovascular repair of inflammatory abdominal aortic aneurysm (IAAA), with particular attention to the fate of the aneurysm sac, perianeurysmal fibrosis (PAF), and renal function.	2002
adenylate cyclase 10, soluble(ADCY10)	11367584_2	BACKGROUND: In patients with nasolacrimal duct obstruction, the inflammation and fibrosis may be secondary to coexisting infectious colonization within the lumen of the lacrimal sac.	2001
adenylate cyclase 10, soluble(ADCY10)	10812402_10	Non-healing areas were usually associated with anal sac rupture or chronic fibrosis.	2000
adenylate cyclase 10, soluble(ADCY10)	10450052_2	The long-term results of endolymphatic sac (ES) shunt surgery in M\xc3\xa9ni\xc3\xa8re's disease have been reported to be unsatisfactory compared to the short-term results, probably because of fibrosis and/or reclosure of the incised ES.	1999
adenylate cyclase 10, soluble(ADCY10)	10219797_13	There were two late side effects of treatment: an orbital sac fibrosis and a 6-month decline of cognitive function documented by formal neuropsychiatric testing.	1999
adenylate cyclase 10, soluble(ADCY10)	10333153_2	One of the most common complications of lumbar spine surgery is peridural fibrosis, a fibroblastic invasion of the nerve roots and the peridural sac exposed at operation.	1999
adenylate cyclase 10, soluble(ADCY10)	9386232_4	Three basic pathologic mechanisms have emerged; fibrosis of the endolymphatic sac and vestibular epithelia, altered glycoprotein metabolism, and immune-mediated inner ear disease.	1998
adenylate cyclase 10, soluble(ADCY10)	9762943_7	In each case, details were recorded regarding fibrosis, necrosis, hemorrhage, embryonal carcinoma (undifferentiated teratoma), yolk sac tumor, choriocarcinoma (trophoblastic tumor), differentiated teratoma (mature and immature), dysplasia in somatic tissues, and non- germ cell tumor (GCT) malignancies.	1998
adenylate cyclase 10, soluble(ADCY10)	9464606_13	Insertion of an endovascular graft was associated with a reduction in aneurysm sac pressure, reduced aneurysm growth, and fibrosis of the space between the aneurysm sac and the graft.	1998
adenylate cyclase 10, soluble(ADCY10)	9470949_4	RESULTS: Histopathologic findings included: (1) organs of Corti missing or absent in all cochlear turns; (2) cells decreased in spiral ganglia, and lymphocytic infiltration; (3) absence of portions of the spiral prominence; (4) endolymphatic hydrops in basal, middle, and apical cochlear turns and in the saccule and utricle; (5) fibrosis and osteoneogenesis of a scala tympani of the basal turn of …	1998
adenylate cyclase 10, soluble(ADCY10)	9373121_5	RESULTS: A total of 147 patients (98%) had histopathologic findings consistent with inflammation or fibrosis of the lacrimal sac or both.	1997
adenylate cyclase 10, soluble(ADCY10)	7747228_11	RESULTS: Fourteen patients had focal or diffuse epidural fibrosis around the nerve root and/or the thecal sac at the operated level, whereas the postoperative findings for two patients were "normal," one in the operated and one in the control group.	1995
adenylate cyclase 10, soluble(ADCY10)	7767634_8	After 9 weeks, the yolk sac showed a marked degeneration of surface cells, accompanied by increased fibrosis of the mesenchyme.	1995
adenylate cyclase 10, soluble(ADCY10)	7816463_4	Three basic pathologic mechanisms have emerged: fibrosis of the endolymphatic sac and vestibular epithelia, altered glycoprotein metabolism, and inner ear viral infection.	1995
adenylate cyclase 10, soluble(ADCY10)	1629368_10	When fibrosis or extensive damage of the lacrimal sac had occurred, wide anastomosis with the nasal duct was indicated.	1992
adenylate cyclase 10, soluble(ADCY10)	1554647_4	The lacrimal sac had chronic inflammatory changes in 33 of 37 patients with varying degrees of fibrosis in 34 of 37.	1992
adenylate cyclase 10, soluble(ADCY10)	1917411_7	The dural sac, containing nerve roots and spinal cord, was removed intact from the lumbar spinal canal, fixed, sectioned, stained, and examined microscopically for evidence of arachnoid inflammation and fibrosis.	1991
adenylate cyclase 10, soluble(ADCY10)	2117717_4	In all four, the vestibular aqueduct was filled with active otosclerotic foci; the lumen of the endolymphatic duct and sac was narrowed as a result of fibrosis, and endolymphatic hydrops, more severe in the pars inferior than the pars superior, was observed.	1990
adenylate cyclase 10, soluble(ADCY10)	3872655_2	There have been several reports of perisaccular fibrosis of the endolymphatic sac in some autopsied cases of Meniere's disease.	1985
adenylate cyclase 10, soluble(ADCY10)	3872655_3	We attempted to initiate perisaccular fibrosis of the sac in guinea pigs by injecting a small amount of 10% silver nitrate solution that cauterizes the tissue readily to produce scar, ie, fibrosis.	1985
adenylate cyclase 10, soluble(ADCY10)	6693814_7	Surgery on the endolymphatic sac was not associated with fibrosis or obliteration of its lumen.	1984
adenylate cyclase 10, soluble(ADCY10)	6606310_7	Postoperative fibrosis demonstrated by CT in one patient and at surgery in another showed intermediate to high signal intensity on NMR, easily distinguishing it from nearby thecal sac and disk.	1983
adenylate cyclase 10, soluble(ADCY10)	6405352_7	Microcirculation changes may be associated with fibrosis of the perisac tissues or shortening of the intermediate sac region or might be physiologically determined.	1983
adenylate cyclase 10, soluble(ADCY10)	7231927_4	The most common and prominent finding was perisaccular fibrosis of the endolymphatic sac which appears to disturb the free absorption of endolymph in the endolymph in the endolymphatic sac resulting in endolymphatic hydrops.	1981
adenylate cyclase 10, soluble(ADCY10)	6773100_4	Myelography was performed with one of the contrast media in monkeys; four weeks later the degree of arachnoid fibrosis was determined in each animal by myelographic and histologic studies of the dural sac.	1980
adenylate cyclase 10, soluble(ADCY10)	554467_6	Although failure of shunt surgery was presumably due to fibrosis in the shunt area in the reported case, the human endolymphatic sac seemed to be more resistant to surgical trauma than the sac of the experimental animals.	1979
adenylate cyclase 10, soluble(ADCY10)	423657_5	Extensive subepithelial fibrosis with loss of vascularity and obliteration of portions of the lumen of the endolymphatic sac by an ingrowth of collagen is noted in both specimens.	1979
adenylate cyclase 10, soluble(ADCY10)	503485_3	Common causes of obstruction include canalicular disruption, lacrimal sac fibrosis, and external and internal nasal trauma.	1979
adenylate cyclase 10, soluble(ADCY10)	889226_7	Also discussed are fibrosis and osteogenesis as a late consequence of hemorrhage, and the coexistence of endolymphatic hydrops with an anomaly of the vestibular aqueduct and endolymphatic sac.	1977
adenylate cyclase 10, soluble(ADCY10)	1253477_6	More severe fibrosis produced additional stenosis of a segment of the thecal sac.	1976
adenylate cyclase 10, soluble(ADCY10)	789315_5	Gross necropsy findings included fibrosis of the pulmonary parenchyma as well as evidence of air sac infection, extensive pneumonia, and extensive chronic pleuritis.	1976
adenylate cyclase 10, soluble(ADCY10)	4545397_2	Compensatory collateral venous drainage with endolymphatic sac fibrosis.	1974
adenylate cyclase 2(ADCY2)	25659822_3	Because silicosis is an occupational lung disease characterized by unabated inflammation and fibrosis, in this study we tested the therapeutic properties of the N-terminal ANXA1-derived peptide annexin 1-(2-26) (Ac2-26) on experimental silicosis.	2015
adenylate cyclase 2(ADCY2)	23389926_2	UNLABELLED: Large, but not small, cholangiocytes (1) secrete bicarbonate by interaction with secretin receptors (SRs) through activation of cystic fibrosis transmembrane regulator (CFTR), Cl(-) /HCO3 (-) (apex) anion exchanger 2 (Cl(-) /HCO3 (-) AE2), and adenylyl cyclase (AC)8 (proteins regulating large biliary functions) and (2) proliferate in response to bile duct ligation (BDL) by activation …	2013
adenylate cyclase 2(ADCY2)	19252091_6	Although the two AC groups exhibited a comparable degree of hypertrophy (+30% in LV mass; +20% in myocyte surface) and a similar increase in the amount of fibrosis compared with control animals (C group; n = 22), a worsening of LV mechanical performance was observed only in AC(2) rats at both organ and cellular levels.	2009
adenylate cyclase 2(ADCY2)	19252091_5	Then subgroups of AC(1) and AC(2) left ventricles (LV) were used to evaluate 1) LV anatomy and fibrosis (morphometry), 2) expression levels (immunoblotting) and spatial distribution (immunohistochemistry) of alpha-skeletal actin (alpha-SKA), alpha-cardiac actin (alpha-CA), and alpha-smooth muscle actin (alpha-SMA), and 3) cell mechanics and calcium transients in enzimatically isolated myocytes.	2009
adenylate cyclase 5(ADCY5)	25193472_6	The \xce\xb2\xe2\x82\x82-AR Tg \xc3\x97 AC5 KO bigenic mice prevented the cardiomyopathy as reflected by improved LV ejection fraction, reduced apoptosis, fibrosis, and myocyte size and preserved exercise capacity.	2014
adenylate cyclase 5(ADCY5)	23536361_4	METHODS AND RESULTS: Chronic isoproterenol increased oxidative stress and induced more severe cardiomyopathy in AC5 Tg, as left ventricular ejection fraction fell 1.9-fold more than wild type, along with greater left ventricular dilation and increased fibrosis, apoptosis, and hypertrophy.	2013
adenylate cyclase 5(ADCY5)	22814399_4	The epithelial sodium channel (ENaC), sodium/glucose cotransporter 1 (Slc5a1), transmembrane protein 16 (Tmem16a, b, f, and g), cystic fibrosis transmembrane conductance regulator (Cftr), and mucin (Muc4, 5ac, and 5b) mRNA expression was characterized by RT-PCR.	2012
adenylate cyclase 5(ADCY5)	17662940_5	Old AC5 KO mice are also protected from aging-induced cardiomyopathy, e.g., hypertrophy, apoptosis, fibrosis, and reduced cardiac function.	2007
adenylate cyclase 6(ADCY6)	21527160_7	No changes in LV weight to tibial length ratio, LV fibrosis, and expression of fetal genes (atrial natriuretic factor, \xce\xb1-skeletal muscle actin, and \xce\xb2-myosin heavy chain) and collagens were observed between AC6-On and AC6-Off groups.	2011
adenylate cyclase 6(ADCY6)	22051336_13	LV function improved progressively in AC6 mice from weeks 2 to 4 and was associated with reduced LV fibrosis.	2011
adenylate cyclase 6(ADCY6)	20359598_2	OBJECTIVES: This study sought to test the hypothesis that pressure stress of the adenylyl cyclase 6-deleted (AC6-KO) heart would result in excessive hypertrophy, early dilation and dysfunction, and increased fibrosis.	2010
adenylate cyclase 6(ADCY6)	20359598_8	In addition, AC6 deletion was associated with less LV fibrosis (p<0.01) and reduced collagen types I (p<0.05) and III (p<0.05) expression 3 weeks after TAC.	2010
adenylate cyclase 6(ADCY6)	20348281_11	Because AC6 overexpression does not lead to enhanced basal or PGE(2)-stimulated levels of cAMP, we conclude that endogenous catecholamines or prostacyclin is produced during bleomycin-induced lung fibrosis and that these signals have antifibrotic potential.	2010
adenylate cyclase 6(ADCY6)	20348281_1	Fibroblast-specific expression of AC6 enhances beta-adrenergic and prostacyclin signaling and blunts bleomycin-induced pulmonary fibrosis.	2010
adenylate cyclase 6(ADCY6)	20348281_7	Lung fibrosis was induced in FTS1-AC6(+/-) mice and littermate controls by intratracheal instillation of saline or bleomycin.	2010
adenylate cyclase 6(ADCY6)	20348281_6	To examine if increased AC6 expression would impact the development of fibrosis in an animal model, we generated transgenic mice that overexpress AC6 under a fibroblast-specific promoter, FTS1.	2010
adenylate cyclase 8(ADCY8)	23389926_2	UNLABELLED: Large, but not small, cholangiocytes (1) secrete bicarbonate by interaction with secretin receptors (SRs) through activation of cystic fibrosis transmembrane regulator (CFTR), Cl(-) /HCO3 (-) (apex) anion exchanger 2 (Cl(-) /HCO3 (-) AE2), and adenylyl cyclase (AC)8 (proteins regulating large biliary functions) and (2) proliferate in response to bile duct ligation (BDL) by activation …	2013
adenylate cyclase 8(ADCY8)	20185575_9	Small cholangiocytes: (i) proliferated leading to increased IBDM; (ii) displayed activation of PKCbetaII; and (iii) de novo expressed secretin receptor, cystic fibrosis transmembrane regulator, Cl(-)/HCO(3)(-) anion exchanger 2 and AC8, and responded to secretin.	2010
adenylate cyclase activating polypeptide 1(ADCYAP1)	14744818_13	In the cystic fibrosis airway epithelial IB3-1 cell lacking functional CFTR but expressing VPAC(1) receptors, neither VIP, PACAP-27 nor forskolin stimulated chloride transport.	2004
adenylate cyclase associated protein 1(CAP1)	24637477_14	Limited correlation between CAP and 1H-MRS may be explained by different technical aspects, anthropometry, and presence of advanced liver fibrosis.	2014
adenylate cyclase associated protein 1(CAP1)	17347851_2	The PDZ-binding protein PDZK1 (CAP70/PDZ-dc-1/NHERF3) in vitro binds to cystic fibrosis transmembrane conductance regulator (CFTR), the anion exchangers SLC26A3 and SLC26A6 and the Na(+)/H(+) exchanger NHE3, all of which are major transport proteins for intestinal anion secretion and salt absorption.	2007
adenylate cyclase associated protein 1(CAP1)	12460120_10	Other mechanisms known to interact with ENaC and affect sodium transport include channel-activating protease 1 (CAP-1), a membrane-anchored protein, and the cystic fibrosis transmembrane regulator.	2002
adenylate kinase 1(AK1)	24687120_4	To investigate the importance of plasmin suppression vs vitronectin-binding pathways of PAI-1 in cardiac fibrosis, we studied uninephrectomized mice fed a high salt diet and infused with angiotensin II (Ang II) together with different PAI-1 variants, including PAI-1AK (AK) that inhibits plasminogen activators but does not bind vitronectin, PAI-1RR (RR) that binds vitronectin but does not have pro…	2014
adenylosuccinate lyase(ADSL)	17727333_10	The potential pro-inflammatory role of AMPs contributes to the disease processes in inflammatory disorders such as asthma, chronic obstructive pulmonary disease, sepsis or pulmonary fibrosis.	2007
adenylosuccinate lyase(ADSL)	157699_7	These observations suggest nonspecific changes in the AMPS composition caused by chronic tissue damage, calcification, and fibrosis.	1979
adhesion G protein-coupled receptor E1(ADGRE1)	23614351_11	Repetitive MAS were strongly associated with EMR1-rs373533 in Kumasi (p = 0.00003) and cystic fibrosis transmembrane conductance receptor-rs17140229 in the pooled analysis (p = 0.00543).	2013
adhesion G protein-coupled receptor G1(ADGRG1)	24742924_7	These findings demonstrate that reduced expression of GPR56 in lung fibroblasts may be an important link with pulmonary fibrosis, playing a role in regulating some important fibroblast functions.	2014
adhesion G protein-coupled receptor L4(ADGRL4)	22606234_8	CONCLUSIONS: ELTD1 deficiency exacerbates cardiac hypertrophy and cardiac function induced by AB-induced pressure overload by promoting both cardiomyocyte hypertrophy and cardiac fibrosis.	2012
adhesion G protein-coupled receptor L4(ADGRL4)	2051905_4	The incidence of central vein ETL was significantly higher in AH, CAH, PBC, IM, alcoholic fibrosis, and NSRH than that of the control group, and that of portal vein ETL was significantly higher in AH, CPH, CAH, LC, PBC, IM, and alcoholic fibrosis.	1991
adhesion G protein-coupled receptor L4(ADGRL4)	2051905_2	An attachment of lymphocytes to the vascular wall, a feature called "endothelialitis" (ETL) or "endotheliitis", was investigated in various liver biopsies, including acute hepatitis (AH), hepatic infectious mononucleosis (IM), drug-induced hepatitis, alcoholic hepatitis and fibrosis, chronic persistent hepatitis (CPH), chronic active hepatitis (CAH), liver cirrhosis (LC), primary biliary cirrhosi…	1991
adhesion G protein-coupled receptor V1(ADGRV1)	24117263_4	Male Wistar rats were injected subcutaneously with ISO (15 mg\xc2\xb7(kg body mass)(-1)) to induce experimental cardiac fibrosis.	2013
adhesion molecule with Ig like domain 2(AMIGO2)	19308539_13	Debridement to clear the acetabulum from intra-articular fibrosis is attempted prior to acetabular reconstruction (Salter, Dega, or triple pelvic osteotomy).	2009
adhesion regulating molecule 1(ADRM1)	11319282_12	There was telangiectasia in 1, arm edema in 2, no fibrosis in supraclavicular-tangential fields junction and no other soft-tissue or bone complications.	2001
adiponectin receptor 1(ADIPOR1)	25945502_18	Functional AdipoR1 are expressed by human WI-38 lung fibroblasts, suggesting potential future clinical applicability of APN against pulmonary fibrosis.	2015
adiponectin receptor 1(ADIPOR1)	19019483_9	Hepatocyte AdipoR2 mRNA specifically correlated with serum adiponectin and steatosis (p = .003), while hepatocyte AdipoR1 mRNA dropped in pronounced fibrosis (p = .060).	2008
adiponectin receptor 1(ADIPOR1)	17912467_5	The aim of our current study was to examine the alteration of each isoform of adiponectin and its receptors (AdipoR1, AdipoR2, and T-cadherin) during the choline-deficient L-amino acid-defined (CDAA) diet-induced rat liver fibrosis development.	2007
adiponectin receptor 2(ADIPOR2)	18666257_5	Inhibition of hepatic AdipoR2 expression aggravated the pathological state of NASH at all stages: fatty changes, inflammation, and fibrosis.	2008
adiponectin receptor 2(ADIPOR2)	18666257_6	In contrast, enhancement of AdipoR2 expression in the liver improved NASH at every stage, from the early stage to the progression of fibrosis.	2008
adiponectin receptor 2(ADIPOR2)	19019483_9	Hepatocyte AdipoR2 mRNA specifically correlated with serum adiponectin and steatosis (p = .003), while hepatocyte AdipoR1 mRNA dropped in pronounced fibrosis (p = .060).	2008
adiponectin receptor 2(ADIPOR2)	17912467_5	The aim of our current study was to examine the alteration of each isoform of adiponectin and its receptors (AdipoR1, AdipoR2, and T-cadherin) during the choline-deficient L-amino acid-defined (CDAA) diet-induced rat liver fibrosis development.	2007
adiponectin, C1Q and collagen domain containing(ADIPOQ)	25957229_11	A higher level of fibrosis was observed in the tubulointerstitial and glomerular compartments of the Akita/APN(-/-) mice and adiponectin was found to inhibit TGF\xce\xb2-induced Smad2 and Smad3 phosphorylation in vitro.	2015
adiponectin, C1Q and collagen domain containing(ADIPOQ)	26153548_11	\xe2\x80\xa2 Adiponectin inhibits CCL4-induced liver fibrosis by modulation of liver iNOS/NO.	2015
adiponectin, C1Q and collagen domain containing(ADIPOQ)	25945502_1	Adiponectin attenuates lung fibroblasts activation and pulmonary fibrosis induced by paraquat.	2015
adiponectin, C1Q and collagen domain containing(ADIPOQ)	26069285_7	RESULTS: OSAS was characterised by an increased intestinal permeability and endotoxemia, coupled with TLR-4 upregulation in hepatocytes, Kupffer and hepatic stellate cells (HSCs) and by an expansion of an adiponectin-deficient HPC pool, key features of steatohepatitis and fibrosis.The duration of haemoglobin desaturation (SaO2 <90%) independently predicted intestinal permeability (\xce\xb2: 0.396…	2015
adiponectin, C1Q and collagen domain containing(ADIPOQ)	26153548_8	Therefore, adiponectin-mediated NO signaling may be a novel target for the treatment of liver fibrosis.	2015
adiponectin, C1Q and collagen domain containing(ADIPOQ)	26153548_1	Adiponectin attenuates liver fibrosis by inducing nitric oxide production of hepatic stellate cells.	2015
adiponectin, C1Q and collagen domain containing(ADIPOQ)	26153548_2	UNLABELLED: Adiponectin protects against liver fibrosis, but the mechanisms have not been fully elucidated.	2015
adiponectin, C1Q and collagen domain containing(ADIPOQ)	26153548_5	More advanced liver fibrosis with decreased iNOS/NO levels was observed in adiponectin knockout mice comparing to wide-type mice when administered with CCI4 while NO donor supplementation rescued the phenotype.	2015
adiponectin, C1Q and collagen domain containing(ADIPOQ)	26153548_7	These data suggest that adiponectin inhibits HSC function, further limiting the development of liver fibrosis at least in part through adiponectin-induced NO release.	2015
adiponectin, C1Q and collagen domain containing(ADIPOQ)	25788201_14	In addition, a higher serum adiponectin level was associated with advanced liver fibrosis in elder male HBeAg-negative patients.	2015
adiponectin, C1Q and collagen domain containing(ADIPOQ)	25575598_3	Obesity, a known risk factor for liver fibrosis is associated with reduced levels of adiponectin, a protein that inhibits liver fibrosis in vivo and limits HSC proliferation and migration in vitro.	2015
adiponectin, C1Q and collagen domain containing(ADIPOQ)	25575598_13	Finally, in patients with advanced fibrosis, there was a positive correlation between serum adiponectin and TIMP-1 levels.	2015
adiponectin, C1Q and collagen domain containing(ADIPOQ)	25575598_12	In mice with liver fibrosis, adiponectin had similar effects and limited focal adhesion kinase phosphorylation.	2015
adiponectin, C1Q and collagen domain containing(ADIPOQ)	25656826_5	Initially, two key adipocytokines, leptin and adiponectin, appeared to control many fundamental aspects of the cell and molecular biology related to hepatic fibrosis and its resolution.	2015
adiponectin, C1Q and collagen domain containing(ADIPOQ)	25987952_9	Peroxisome proliferator activated receptor gamma agonists and adiponectin both reduce adipose tissue fibrosis, inflammation and insulin resistance.	2015
adiponectin, C1Q and collagen domain containing(ADIPOQ)	25849026_8	CGA could lower the levels of fasting plasma glucose and HbA1c during late diabetes and improve kidney fibrosis to some extent through the modulation of adiponectin receptor signaling pathways in db/db mice.	2015
adiponectin, C1Q and collagen domain containing(ADIPOQ)	26293833_2	BACKGROUND: Increased levels of adiponectin, a major adipokine with insulin sensitizing properties showing a strong sexual dimorphism, have been reported in individuals with chronic HCV infection (CHC), but data are limited by small samples and lack of control for the genetic background and hepatic fibrosis.	2015
adiponectin, C1Q and collagen domain containing(ADIPOQ)	26293833_9	CONCLUSIONS: CHC is associated with increased serum adiponectin independently of age, body mass, diabetes, ADIPOQ genotype, and of severe liver fibrosis, particularly in men.	2015
adiponectin, C1Q and collagen domain containing(ADIPOQ)	25677507_15	This novel study demonstrates that increasing the canonical Wnt1 signaling cascade with the subsequent increase in HO-1, adiponectin and angiogenesis ameliorates fibrosis and cardiac dysfunction in a mouse model of MI and supports the hypothesis that HO-1 is an integral component of the EETs-adiponectin axis and is central for the control of resistance to fibrosis and vascular dysfunction and in …	2015
adiponectin, C1Q and collagen domain containing(ADIPOQ)	26082668_6	These values were then assessed for associations with fibrosis stage, anthropometric markers (age, sex, and body mass index), biochemical markers (alanine aminotransferase, aspartate aminotransferase, \xce\xb3-glutamyl transpeptidase, albumin, platelet count, total cholesterol, triglycerides, low-density lipoprotein cholesterol, and glycosylated hemoglobin), and relevant disease-specific biomarke…	2015
adiponectin, C1Q and collagen domain containing(ADIPOQ)	25575598_9	Serum from patients with liver fibrosis was examined for adiponectin and tissue inhibitor of metalloproteinase-1 (TIMP-1) protein.	2015
adiponectin, C1Q and collagen domain containing(ADIPOQ)	25099270_5	In the present study, we investigated the cardioprotective effect of globular adiponectin (gAcrp) on angiotensin II-induced atrial hypertrophy and fibrosis in neonatal Sprague-Dawley rat.	2014
adiponectin, C1Q and collagen domain containing(ADIPOQ)	25154876_1	Adiponectin modulates focal adhesion disassembly in activated hepatic stellate cells: implication for reversing hepatic fibrosis.	2014
adiponectin, C1Q and collagen domain containing(ADIPOQ)	25154876_2	Previous evidence indicates that adiponectin possesses antifibrogenic activity in inhibiting liver fibrosis.	2014
adiponectin, C1Q and collagen domain containing(ADIPOQ)	25099270_1	AdipoR1/APPL1 potentiates the protective effects of globular adiponectin on angiotensin II-induced cardiac hypertrophy and fibrosis in neonatal rat atrial myocytes and fibroblasts.	2014
adiponectin, C1Q and collagen domain containing(ADIPOQ)	24464020_4	Adiponectin crossing the glomerular filtration barrier possibly inhibits inflammation, fibrosis and oxidative stress in kidneys through activation of AMP-activated protein kinase.	2014
adiponectin, C1Q and collagen domain containing(ADIPOQ)	25192951_9	Cardiac fibrosis (indicated by excessive collagen deposition, decreased by Adiponectin and Mmp13 expression, and up-regulated by Mmp8 expression) and impairment of autophagic signalling (indicated by decreases in Foxo3 and LC3 II-to-LC3 I ratio) were shown in the hearts of diabetic mice.	2014
adiponectin, C1Q and collagen domain containing(ADIPOQ)	25504959_10	CONCLUSION: These observations establish a novel link between intradermal adipose tissue loss and dermal fibrosis and demonstrate that adiponectin-positive intradermal progenitors give rise to dermal myofibroblasts.	2014
adiponectin, C1Q and collagen domain containing(ADIPOQ)	25154876_13	The in vivo and in vitro data presented indicate that disassembly of focal adhesion complexes in HSCs is pivotal for hepatic fibrosis therapy, now that small adiponectin-like peptides are available.	2014
adiponectin, C1Q and collagen domain containing(ADIPOQ)	24744899_8	Treatment with adiponectin at either dose reduced the increases in albuminuria and markers of renal fibrosis seen in db/db mice, without affecting BW and blood glucose.	2014
adiponectin, C1Q and collagen domain containing(ADIPOQ)	24407161_10	The finding that adiponectin upregulated ECM-associated factors might mean that high levels of adiponectin could modulate dermal fibrosis was observed in recipients with cGVHD.	2014
adiponectin, C1Q and collagen domain containing(ADIPOQ)	24381003_10	We conclude that reversal of the HFD-induced hepatic steatosis and fibrosis by chronic CB1 blockade, but not the parallel reduction in adiposity and improved glycemic control, is mediated by adiponectin.	2014
adiponectin, C1Q and collagen domain containing(ADIPOQ)	25504959_1	Myofibroblasts in murine cutaneous fibrosis originate from adiponectin-positive intradermal progenitors.	2014
adiponectin, C1Q and collagen domain containing(ADIPOQ)	24982243_3	Leptin is known to promote tissue fibrosis, while adiponectin has recently been demonstrated to be anti-fibrogenic in tissue fibrosis.	2014
adiponectin, C1Q and collagen domain containing(ADIPOQ)	25099270_14	Taken together, AMPK pivotally interacts with NF-\xce\xbaB and PI3K, mediating the cardioprotective effect of adiponectin, and may serve as a therapeutic target for preventing atrial hypertrophy and fibrosis.	2014
adiponectin, C1Q and collagen domain containing(ADIPOQ)	25464487_11	CONCLUSIONS: Treatment of DS/obese rats with pioglitazone exacerbated obesity but attenuated LV hypertrophy, fibrosis, and diastolic dysfunction, with these latter effects being associated with the activation of cardiac AMPK signaling likely as a result of the stimulation of adiponectin secretion.	2014
adiponectin, C1Q and collagen domain containing(ADIPOQ)	24684303_1	Adiponectin suppresses angiotensin II-induced inflammation and cardiac fibrosis through activation of macrophage autophagy.	2014
adiponectin, C1Q and collagen domain containing(ADIPOQ)	25310107_1	Adiponectin agonist ADP355 attenuates CCl4-induced liver fibrosis in mice.	2014
adiponectin, C1Q and collagen domain containing(ADIPOQ)	23897791_13	These data suggest that lower levels of adiponectin and SNP +45 polymorphism of the adiponectin gene are likely to play an important role in myocardial fibrosis in hypertensive patients.	2013
adiponectin, C1Q and collagen domain containing(ADIPOQ)	23833260_12	Taken together, these findings identify adiponectin as a critical regulator of monocyte-to-fibroblast transition and renal fibrosis, suggesting that inhibition of adiponectin/AMPK signaling may represent a novel therapeutic target for fibrotic kidney disease.	2013
adiponectin, C1Q and collagen domain containing(ADIPOQ)	23430039_5	There is evidence that adiponectin decreases hepatic and systematic insulin resistance, and attenuates liver inflammation and fibrosis.	2013
adiponectin, C1Q and collagen domain containing(ADIPOQ)	23646232_2	AIM: To study serum levels of leptin and adiponectin in patients with chronic hepatitis C virus infection genotype-4 (HCV-4) related steatosis and fibrosis.	2013
adiponectin, C1Q and collagen domain containing(ADIPOQ)	23646232_1	Significance of serum leptin and adiponectin levels in Egyptian patients with chronic hepatitis C virus associated hepatic steatosis and fibrosis.	2013
adiponectin, C1Q and collagen domain containing(ADIPOQ)	23646232_6	We measured total serum leptin and adiponectin levels, as potential predictors for liver steatosis and fibrosis.	2013
adiponectin, C1Q and collagen domain containing(ADIPOQ)	23646232_16	CONCLUSION: In male patients with chronic HCV-4, serum adiponectin levels are elevated in hepatic fibrosis, but decreased in steatosis.	2013
adiponectin, C1Q and collagen domain containing(ADIPOQ)	23897791_1	Influence of serum adiponectin level and SNP +45 polymorphism of adiponectin gene on myocardial fibrosis.	2013
adiponectin, C1Q and collagen domain containing(ADIPOQ)	23897791_3	Our study investigates the influence of the SNP +45 polymorphism of the adiponectin gene and serum levels of adiponectin on myocardial fibrosis in patients with essential hypertension.	2013
adiponectin, C1Q and collagen domain containing(ADIPOQ)	23897791_2	Adiponectin plays an important role in the development of hypertension, atherosclerosis, and cardiomyocyte hypertrophy, but very little was known about the influence of serum adiponectin or the adiponectin gene polymorphism on myocardial fibrosis.	2013
adiponectin, C1Q and collagen domain containing(ADIPOQ)	23833260_4	Here, we used a mouse model of tubulointerstitial fibrosis to determine whether adiponectin, which is elevated in CKD and is associated with disease progression, regulates monocyte-to-fibroblast transition and fibroblast activation in injured kidneys.	2013
adiponectin, C1Q and collagen domain containing(ADIPOQ)	23833260_1	Adiponectin promotes monocyte-to-fibroblast transition in renal fibrosis.	2013
adiponectin, C1Q and collagen domain containing(ADIPOQ)	23442415_10	On performing logistic regression, BMI [odds ratio (OR) 6.5; P=0.004], serum leptin (OR 27.8; P \xe2\x89\xa4 0.001), aspartate aminotransferase (OR 1.06; P \xe2\x89\xa4 0.001), IR (OR 1.15; P \xe2\x89\xa4 0.001), histological activity index (OR 1.77; P=0.006), and fibrosis (OR 2.93; P=0.001) were found to be independent negative predictors of SVR, whereas serum adiponectin (OR 0.74; P \xe2\x89\xa…	2013
adiponectin, C1Q and collagen domain containing(ADIPOQ)	23914225_3	OBJECTIVES: In the present report, we assessed the association between adiponectin, its receptors and hepatic steatosis, fibrosis, and inflammation with hepatitis B virus.	2013
adiponectin, C1Q and collagen domain containing(ADIPOQ)	23334396_7	POD-ATTAC mice lacking adiponectin developed irreversible albuminuria and renal failure; conversely, POD-ATTAC mice overexpressing adiponectin recovered more rapidly and exhibited less interstitial fibrosis.	2013
adiponectin, C1Q and collagen domain containing(ADIPOQ)	23607264_6	Body mass index, visceral fat area, liver function tests, serum lipids, fibrosis markers, ferritin, adiponectin, leptin, urinary 8-hydroxy-2'-deoxyguanosine (U-8OHdG) and elasticity were measured periodically during the study.	2013
adiponectin, C1Q and collagen domain containing(ADIPOQ)	22548780_11	In longitudinal studies changes in serum adiponectin levels were inversely correlated with changes in skin fibrosis.	2012
adiponectin, C1Q and collagen domain containing(ADIPOQ)	22664476_10	A positive association between adiponectin and hepatic inflammation and fibrosis was identified.	2012
adiponectin, C1Q and collagen domain containing(ADIPOQ)	22548780_14	CONCLUSIONS: Levels of adiponectin, reflecting PPAR-gamma activity, are correlated with skin fibrosis and might have potential utility as a biomarker in SSc.	2012
adiponectin, C1Q and collagen domain containing(ADIPOQ)	23092446_1	The adipokine adiponectin has potent anti-fibrotic effects mediated via adenosine monophosphate-activated protein kinase: novel target for fibrosis therapy.	2012
adiponectin, C1Q and collagen domain containing(ADIPOQ)	22996622_4	In this study we examined 65 patients with advanced biopsy-proven NASH (fibrosis stage 3-4) and 54 with mild disease (fibrosis stage 0-1) to determine if disappearance of steatosis correlated with changes in serum adiponectin.	2012
adiponectin, C1Q and collagen domain containing(ADIPOQ)	22548780_1	Levels of adiponectin, a marker for PPAR-gamma activity, correlate with skin fibrosis in systemic sclerosis: potential utility as biomarker?	2012
adiponectin, C1Q and collagen domain containing(ADIPOQ)	23092446_12	Restoring the adiponectin signaling axis in fibroblasts might, therefore, represent a novel pharmacological approach to controlling fibrosis.	2012
adiponectin, C1Q and collagen domain containing(ADIPOQ)	23092446_11	Since the levels of adiponectin as well as its receptor are impaired in scleroderma patients with progressive fibrosis, the present results suggest a potential role for defective adiponectin expression or function in progressive fibrogenesis in scleroderma and other chronic fibrosing conditions.	2012
adiponectin, C1Q and collagen domain containing(ADIPOQ)	23114743_9	Logistic regression analysis showed that increase in age [odds ratio (OR), 1.056; 95% confidence interval (CI), 1.005-1.110; P=0.030] was the only significant predictor of hepatic fibrosis (OR, 1.056; 95% CI, 1.005-1.110; P=0.030), whereas increase in age (OR, 1.066; 95% CI, 1.006-1.130; P=0.030), the presence of IR (OR, 5.621; 95% CI, 1.547-20.425; P=0.009), and decrease in adiponectin levels (O…	2012
adiponectin, C1Q and collagen domain containing(ADIPOQ)	23127227_11	In conclusion, the TZD pioglitazone improved hepatic fibrosis in rats with NASH by upregulating adiponectin expression and activating AMPK, thus subsequently inhibiting the activation of hepatic stellate cells and the overproduction of extracellular matrix.	2012
adiponectin, C1Q and collagen domain containing(ADIPOQ)	22457861_7	SVR was achieved by 57% of patients and was associated with fibrosis score (odds ratio: 6.5; P = 0.001) and adiponectin level (odds ratio: 1.3; P = 0.01).	2012
adiponectin, C1Q and collagen domain containing(ADIPOQ)	22876924_9	Adiponectin is able to regulate steatosis, insulin resistance, inflammation and fibrosis.	2012
adiponectin, C1Q and collagen domain containing(ADIPOQ)	22508243_8	However, the HFHC diet led to significantly more profound hepatic steatosis, substantial inflammation, and perisinusoidal fibrosis (i.e., steatohepatitis), associated with adipose tissue inflammation and a reduction in plasma adiponectin levels.	2012
adiponectin, C1Q and collagen domain containing(ADIPOQ)	22467277_5	HPCs and HPC-expressing adipokines (e.g., adiponectin, resistin, and glucagon-like peptide 1 [GLP-1]) were counted and correlated with steatosis, inflammation, hepatocyte ballooning, fibrosis, and NAFLD activity score (NAS).	2012
adiponectin, C1Q and collagen domain containing(ADIPOQ)	23067270_8	Patients with NASH or with advanced fibrosis had equal cytokine levels to those without NASH or with absent/light fibrosis, except for a lower serum adiponectin (8.59 vs 12.77\xe2\x80\x89\xce\xbcg/mL; P\xe2\x80\x89=\xe2\x80\x890.015) in patients with NASH and a lower TGF-\xce\xb21 (170 vs 180\xe2\x80\x89pg/mL; P\xe2\x80\x89=\xe2\x80\x890.026) in patients with advanced fibrosis.	2012
adiponectin, C1Q and collagen domain containing(ADIPOQ)	23067270_9	In multivariate analysis, lower adiponectin was independently associated with NASH (odds ratio\xe2\x80\x89=\xe2\x80\x897.7, 95% confidence interval\xe2\x80\x89=\xe2\x80\x891.5-39.9, P\xe2\x80\x89=\xe2\x80\x890.014, for the subgroup with adiponectin below the median value), whereas both lower adiponectin and lower TGF-\xce\xb21 levels were associated with advanced fibrosis.	2012
adiponectin, C1Q and collagen domain containing(ADIPOQ)	25755455_6	Before and after treatment, liver function tests, serum insulin, C-peptide levels, TNF-\xce\xb1, adiponectin, leptin levels, HOMA-IR and hepatocyte injury and fibrosis scores on liver histology were assessed.	2012
adiponectin, C1Q and collagen domain containing(ADIPOQ)	21539538_3	Adiponectin, an adipocyte-derived insulin-sensitizing hormone, might play a protective role against hepatic fibrosis.	2011
adiponectin, C1Q and collagen domain containing(ADIPOQ)	21356120_11	In addition, BA patients with significant liver fibrosis had remarkably greater serum adiponectin than insignificant fibrosis counterparts (17.7 \xc2\xb1 1.2 vs. 9.4 \xc2\xb1 1.1 \xce\xbcg/ml, P < 0.001).	2011
adiponectin, C1Q and collagen domain containing(ADIPOQ)	21846328_2	Adiponectin is protective against hepatic fibrosis, whereas leptin promotes fibrosis.	2011
adiponectin, C1Q and collagen domain containing(ADIPOQ)	21846328_1	Adiponectin inhibits leptin signalling via multiple mechanisms to exert protective effects against hepatic fibrosis.	2011
adiponectin, C1Q and collagen domain containing(ADIPOQ)	21539538_9	Interestingly, patients with none or mild fibrosis showed serum adiponectin levels similar to those in healthy controls, while hyperadiponectinemia was associated with moderate to severe stages of fibrosis.	2011
adiponectin, C1Q and collagen domain containing(ADIPOQ)	21747976_6	Furthermore, we discuss findings from our laboratory that suggest that cardiac hypertrophy and fibrosis in the metabolic syndrome may involve cross-talk between aldosterone and adipokines (such as adiponectin).	2011
adiponectin, C1Q and collagen domain containing(ADIPOQ)	21734787_9	Adiponectin antagonizes excess lipid storage in the liver and protects from inflammation and fibrosis.	2011
adiponectin, C1Q and collagen domain containing(ADIPOQ)	21641391_4	In contrast, adiponectin-null animals developed severe fibrosis.	2011
adiponectin, C1Q and collagen domain containing(ADIPOQ)	21852205_1	Normal total and high molecular weight adiponectin levels in adults with cystic fibrosis.	2011
adiponectin, C1Q and collagen domain containing(ADIPOQ)	21615510_6	SSc patients with decreased serum adiponectin levels had higher total skin thickness score and higher incidence of pulmonary fibrosis.	2011
adiponectin, C1Q and collagen domain containing(ADIPOQ)	22110596_12	CONCLUSIONS: Our results suggested that serum total and HMW adiponectin levels were predictors of liver fibrosis, but not prevalence of HCC in patients with HCV infection.	2011
adiponectin, C1Q and collagen domain containing(ADIPOQ)	21356120_14	The elevated serum adiponectin levels also positively correlated with the degree of hepatic dysfunction and liver fibrosis.	2011
adiponectin, C1Q and collagen domain containing(ADIPOQ)	21791204_9	The current data indicate that in NASH hepatic inflammation and fibrosis but not hepatic steatosis induce liver MMP-9 activity, and this induction seems to be related to the anti-inflammatory activity of adiponectin rather than its effect on hepatocellular MMP-9 expression.	2011
adiponectin, C1Q and collagen domain containing(ADIPOQ)	21641391_3	Adiponectin-overexpressing transgenic mice receiving thioacetamide were resistant to fibrosis, compared with controls.	2011
adiponectin, C1Q and collagen domain containing(ADIPOQ)	22110596_6	In addition, the relationship between these adiponectin levels and body mass index (BMI), progression of liver fibrosis, and histological grade of HCC was also evaluated.	2011
adiponectin, C1Q and collagen domain containing(ADIPOQ)	22110596_3	We evaluated whether adiponectin level was associated with the prevalence and histological grade of hepatocellular carcinoma (HCC), and liver fibrosis in patients with hepatitis C virus (HCV) infection.	2011
adiponectin, C1Q and collagen domain containing(ADIPOQ)	21791204_2	Adiponectin protects from inflammation and fibrosis in metabolic liver disease.	2011
adiponectin, C1Q and collagen domain containing(ADIPOQ)	21539538_1	Fibrosis is associated with adiponectin resistance in chronic hepatitis C virus infection.	2011
adiponectin, C1Q and collagen domain containing(ADIPOQ)	21846328_12	These results suggest two novel mechanisms whereby adiponectin inhibits hepatic fibrosis: (i) by promoting binding of SOCS-3 to Ob-Rb, and (ii) by stimulating PTP1B expression and activity, thus inhibiting JAK2/STAT3 signalling at multiple points.	2011
adiponectin, C1Q and collagen domain containing(ADIPOQ)	22098614_1	Growth hormone, dehydroepiandrosterone and adiponectin levels in non-alcoholic steatohepatitis: an endocrine signature for advanced fibrosis in obese patients.	2011
adiponectin, C1Q and collagen domain containing(ADIPOQ)	20623203_1	The relationship of plasma adiponectin with liver fibrosis in morbid obesity.	2010
adiponectin, C1Q and collagen domain containing(ADIPOQ)	20392817_2	We investigated the role of heme oxygenase (HO), adiponectin, and atrial natriuretic peptide (ANP) in uninephrectomized (UnX) deoxycorticosterone-acetate (DOCA)-salt hypertensive rats, a volume-overload model characterized by elevated endothelin-1 (ET-1), mineralocorticoid-induced oxidative/inflammatory insults, fibrosis, hypertrophy, and severe renal histopathological lesions that closely mimic …	2010
adiponectin, C1Q and collagen domain containing(ADIPOQ)	20156586_9	The association between HCV clearance and improvement in HOMA2-IR could not be accounted for by adiponectin or tumor necrosis factor-alpha and was independent of potential confounders including age, gender, ethnicity, body mass index, duration of infection, medications used, and fibrosis.	2010
adiponectin, C1Q and collagen domain containing(ADIPOQ)	20460829_7	In the SHRSP heart, nifedipine significantly inhibited intramyocardial arterial remodeling and perivascular fibrosis, and reduced oxidative stress, while it significantly restored adiponectin and the smooth muscle cell (SMC) phenotype, and selectively restored PPARgamma and Cu/ZnSOD expression/activities to their levels in the WKY rat heart.	2010
adiponectin, C1Q and collagen domain containing(ADIPOQ)	20370678_6	The prototypic adipocytokines adiponectin and leptin are able to regulate many features of NAFLD such as accumulation of liver fat, insulin resistance, inflammatory processes and development of fibrosis.	2010
adiponectin, C1Q and collagen domain containing(ADIPOQ)	20808246_11	Adiponectin, hyaluronic acid, and high-sensitivity C-reactive protein did not achieve significance in predicting steatohepatitis nor significant fibrosis.	2010
adiponectin, C1Q and collagen domain containing(ADIPOQ)	20714777_10	Serum adiponectin levels inversely correlates with the grade of steatosis, histological activity index and the stage of fibrosis.	2010
adiponectin, C1Q and collagen domain containing(ADIPOQ)	20476641_7	Adiponectin levels showed significant inverse correlation between adiponectin and steatosis grade, BMI, HOMA and fibrosis stage.	2010
adiponectin, C1Q and collagen domain containing(ADIPOQ)	20476641_5	RESULTS: Chronic HCV patients with steatosis showed lower serum adiponectin levels and higher levels of leptin, HOMA, alanine aminotransferase, gamma-glutamiltransferase and fibrosis scores.	2010
adiponectin, C1Q and collagen domain containing(ADIPOQ)	20476641_4	METHODS: Adiponectin and leptin levels, HCV genotypes, HCV-RNA, IR (HOMA-IR), body mass index and liver steatosis and fibrosis were assessed in 74 chronic patients with HCV genotype 4.	2010
adiponectin, C1Q and collagen domain containing(ADIPOQ)	20476641_3	The aim of our study was to assess whether host metabolic factors influence the degree of hepatic steatosis and fibrosis in patients infected with hepatitis C virus genotype 4 by investigating the role of adiponectin, leptin and insulin resistance.	2010
adiponectin, C1Q and collagen domain containing(ADIPOQ)	21042023_9	Reduced adiponectin levels may establish a proinflammatory milieu, thus increasing vulnerability to lipotoxicity, which promotes progression from simple steatosis to NASH and even advanced hepatic fibrosis.	2010
adiponectin, C1Q and collagen domain containing(ADIPOQ)	20564215_14	We therefore conclude that the protective effects of adiponectin against liver fibrosis require AMPK activation, and may occur through inhibition of the Jak-Stat signal transduction pathway.	2010
adiponectin, C1Q and collagen domain containing(ADIPOQ)	20564215_13	As anticipated, the combination of leptin and CCl(4) enhanced hepatic fibrosis in both wild-type and Ad-/- mice, as estimated by amount of collagen in injured livers, but wild-type mice had significantly higher levels of SOCS-3 and significantly lower levels of TIMP-1 mRNA and protein than did adiponectin KO mice exposed to both CCl(4) and leptin.	2010
adiponectin, C1Q and collagen domain containing(ADIPOQ)	20392817_10	Because 8-isoprostane stimulates ET-1 to potentiate oxidative stress and fibrosis, up-regulating HO-1 enhanced tissue antioxidant status alongside cellular targets such as adiponectin, AMPK, ANP, and cGMP to suppress ET-1, TGF-beta, and fibronectin with a corresponding decline of renal lesions, proteinuria/albuminuria, and thus improved renal function.	2010
adiponectin, C1Q and collagen domain containing(ADIPOQ)	20662773_9	Increase in adiponectin concentration was related also to histological improvement, in particular, to hepatic steatosis (r = -0.46, P = 0006) and necroinflammation (r = -0.56, P < 0.0001) but importantly also to fibrosis (r = -0.29, P = 0.03).	2010
adiponectin, C1Q and collagen domain containing(ADIPOQ)	20524936_11	In conclusion, adiponectin levels correlate positively with surrogate markers of hepatic fibrosis (transient elastography, fasting serum bile acids and hyaluronate) and are significantly elevated in cases of cirrhosis.	2010
adiponectin, C1Q and collagen domain containing(ADIPOQ)	20604719_8	Adiponectin was lower in the NASH group compared to the SS group (p = 0.02) and it was found to be negatively correlated with hepatic steatosis and fibrosis (r = -0.442, p < 0.001 and r = -0.292, p = 0.02, respectively).	2010
adiponectin, C1Q and collagen domain containing(ADIPOQ)	20415685_7	There is an evidence that adiponectin decreases hepatic and systematic IR and attenuates liver inflammation and fibrosis.	2010
adiponectin, C1Q and collagen domain containing(ADIPOQ)	20564215_1	Adiponectin activation of AMPK disrupts leptin-mediated hepatic fibrosis via suppressors of cytokine signaling (SOCS-3).	2010
adiponectin, C1Q and collagen domain containing(ADIPOQ)	20564215_2	Adiponectin is an adipocytokine that was recently shown to be anti-fibrogenic in hepatic fibrosis.	2010
adiponectin, C1Q and collagen domain containing(ADIPOQ)	19486470_7	Total and not HMW adiponectin was significantly correlated with hepatic fibrosis and inflammation (r = 0.267, P = 0.002, r = 0.278, P < 0.001, respectively).In addition, total adiponectin (r = 0.224, P = 0.002) and HMW adiponectin (r = 0.266, P < 0.0006) significantly correlated with insulin resistance.	2009
adiponectin, C1Q and collagen domain containing(ADIPOQ)	19486470_4	The aim of this study was to clarify the adiponectin changes in genotype 4 hepatitis C virus (HCV)-infected patient in relation to liver histology and insulin resistance, and its usefulness as a predictor of hepatic fibrosis and response to treatment.	2009
adiponectin, C1Q and collagen domain containing(ADIPOQ)	19502655_4	OBJECTIVE: To evaluate whether leptin and adiponectin levels are related to the degree of necroinflammatory activity and fibrosis in patients with nonalcoholic steatohepatitis.	2009
adiponectin, C1Q and collagen domain containing(ADIPOQ)	19606393_7	The effect of antioxidants on oxidative stress and apoptosis was assessed, and activation of adiponectin and expressions of inflammatory factors, apoptosis-related genes, and fibrosis-related genes were assayed.	2009
adiponectin, C1Q and collagen domain containing(ADIPOQ)	19525862_13	Using multivariate logistic regression, adiponectin concentration, aspartate aminotransferase/alanine aminotransferase ratio, and the presence of waist-to-hip ratio >1 were independent predictors of advanced fibrosis.	2009
adiponectin, C1Q and collagen domain containing(ADIPOQ)	19525862_12	Adiponectin concentration was negatively associated with higher stages of fibrosis (one-wayanalysis of variance, P=0.007), and was not associated with NAFLD activity score.	2009
adiponectin, C1Q and collagen domain containing(ADIPOQ)	19525862_15	CONCLUSIONS: Low serum adiponectin levels in NAFLD patients are suggestive of advanced fibrosis.	2009
adiponectin, C1Q and collagen domain containing(ADIPOQ)	19486470_11	Total or HMW adiponectin did not yield receiver operating characteristic (ROC) curves with area under the curve (AUC) >75%, thus the cutoff points have poor sensitivity/specificity as predictors of fibrosis.	2009
adiponectin, C1Q and collagen domain containing(ADIPOQ)	19525862_1	Low serum adiponectin levels are predictive of advanced hepatic fibrosis in patients with NAFLD.	2009
adiponectin, C1Q and collagen domain containing(ADIPOQ)	19486470_16	In spite of this, no adiponectin cutoff level had reasonable sensitivity/specificity for predicting hepatic fibrosis stage, while this may be used as a predictor for antiviral response possibly reflecting improvement in hepatic inflammation post treatment.	2009
adiponectin, C1Q and collagen domain containing(ADIPOQ)	19423859_1	Pleiotropism of adiponectin: inflammation, neovascularization, and fibrosis.	2009
adiponectin, C1Q and collagen domain containing(ADIPOQ)	19486470_13	We can conclude that total adiponectin level, in HCV genotype 4 patients, increases with progression of hepatic fibrosis regardless of insulin resistance.	2009
adiponectin, C1Q and collagen domain containing(ADIPOQ)	19317274_10	For the whole NAFLD group with elevated liver enzymes no correlation was found between serum adiponectin levels and the degree of liver steatosis or fibrosis stage.	2009
adiponectin, C1Q and collagen domain containing(ADIPOQ)	19484180_10	CONCLUSION: Adiponectin SNPs were found to be associated with the progression of liver fibrosis and insulin resistance, suggesting that adiponectin SNPs might play roles in the occurrence and progression of NAFLD.	2009
adiponectin, C1Q and collagen domain containing(ADIPOQ)	19693638_9	In NAFLD patients, serum adiponectin was negatively correlated with activity grade and fibrosis stage, resistin was negatively correlated with steatosis grade (p = 0.033), while leptin was not related to histology.	2009
adiponectin, C1Q and collagen domain containing(ADIPOQ)	19486470_8	As fibrosis did not correlate with insulin resistance (r = 0.081, P = 0.204), the correlation between total adiponectin and fibrosis was not mediated by insulin resistance.	2009
adiponectin, C1Q and collagen domain containing(ADIPOQ)	19706994_5	Cellular mechanisms behind alcoholic liver diseases reveal close temporal associations of PPARalpha, adiponectin, TNF-alpha, cellular inflammation, proliferation, and potentially fibrosis as illustrated in "the hypothesis of seven balances."	2009
adiponectin, C1Q and collagen domain containing(ADIPOQ)	19317274_13	Adiponectin was not associated with the severity of hepatic fibrosis.	2009
adiponectin, C1Q and collagen domain containing(ADIPOQ)	19608019_3	In this study we sought to determine whether serum levels of three adipokines (leptin, adiponectin and resistin) show any biochemical correlation with hepatic steatosis and fibrosis in patients with chronic HCV infection.	2009
adiponectin, C1Q and collagen domain containing(ADIPOQ)	19933924_10	The suppressive effects of pioglitazone on Ang II-induced cardiac hypertrophy and fibrosis were diminished in adiponectin-deficient mice.	2009
adiponectin, C1Q and collagen domain containing(ADIPOQ)	19788607_13	CONCLUSIONS: Adiponectin may play a protective role in the progression of NASH in the early stages by suppressing tumor necrosis factor-alpha expression and liver fibrosis.	2009
adiponectin, C1Q and collagen domain containing(ADIPOQ)	19317274_4	The aim of this study was to investigate the correlation between serum adiponectin levels and steatosis, necroinflammation and fibrosis in different types of NAFLD patients.	2009
adiponectin, C1Q and collagen domain containing(ADIPOQ)	19706994_4	RESULTS: Our research points to a working hypothesis of seven balances for alcoholic liver diseases consisting of: 1) ethanol oxidation balance in hepatocytes; 2) PPAR alpha activities in liver; 3) fatty acid metabolism balance in hepatic mitochondria; 4) gastrointestinal response to ethanol, acetaldehyde and lipopolysaccharide (LPS); 5) Kupffer cells response to LPS, oxidative stress and inflamm…	2009
adiponectin, C1Q and collagen domain containing(ADIPOQ)	19227810_11	In the heart, adiponectin inhibits cardiomyocyte hypertrophy and myocardial fibrosis, through poorly understood mechanisms.	2009
adiponectin, C1Q and collagen domain containing(ADIPOQ)	19019483_1	Adiponectin inhibits steatotic CD95/Fas up-regulation by hepatocytes: therapeutic implications for hepatitis C. BACKGROUND/AIMS: Steatosis may trigger hepatocytes to up-regulate CD95/Fas thereby increasing susceptibility to apoptosis, inflammation and fibrosis.	2008
adiponectin, C1Q and collagen domain containing(ADIPOQ)	18609175_10	In CHB/CHC, resistin levels are independently associated with fibrosis severity, whereas in the association of leptin and adiponectin levels with fibrosis, it seems to be a gender effect.	2008
adiponectin, C1Q and collagen domain containing(ADIPOQ)	19013295_6	Body mass index, serum lipids, liver function tests, fibrosis markers, and adipocytokines (adiponectin, leptin, tumor necrosis factor-alpha) were measured periodically during an open-label study of atorvastatin (10 mg daily) for 24 months.	2008
adiponectin, C1Q and collagen domain containing(ADIPOQ)	18795895_2	BACKGROUND INFORMATION: APN (adiponectin), an adipocyte-derived cytokine highly presented in serum, which exerts antidiabetic, anti-atherosclerotic and cardioprotective actions, also enhances CFB (cardiac fibroblast) proliferation and protects against cardiac fibrosis.	2008
adiponectin, C1Q and collagen domain containing(ADIPOQ)	18511847_9	Adenovirus-expressed adiponectin had no effect on cardiac fibrosis and the PPARgamma ligand pioglitazone did not attenuate AngII-induced cardiac fibrosis, osteopontin expression, or macrophage accumulation in monocyte-specific PPARgamma(-/-) mice.	2008
adiponectin, C1Q and collagen domain containing(ADIPOQ)	19284081_4	Leptin, adiponectin, TNF alfa, the hepatic expression of suppressor of cytokine signalling 3 (SOCS3), and hyperinsulinemia have been considered as heavily influencing fibrosis extension and nonresponsiveness to the IFN-alpha.	2008
adiponectin, C1Q and collagen domain containing(ADIPOQ)	18220291_4	This study was designed to elucidate a role of adiponectin and its mediator adenosine monophosphate-activated protein kinase (AMPK) on proliferation of activated hepatic stellate cells (HSCs), the key cells promoting fibrosis.	2008
adiponectin, C1Q and collagen domain containing(ADIPOQ)	18565022_8	CONCLUSIONS: Adiponectin and TNF-alpha gene polymorphisms were not shown to be associated with NAFLD or significant fibrosis in Chinese people.	2008
adiponectin, C1Q and collagen domain containing(ADIPOQ)	18484349_7	In NASH, hepatic steatosis was independently associated with postprandial intestinal VLDL1 and TAS; necroinflammation with postprandial serum gamma-glutamyltransferase, oxLDL and TAS responses; and fibrosis with adiponectin and postprandial TAS and oxLDL responses.	2008
adiponectin, C1Q and collagen domain containing(ADIPOQ)	19019483_9	Hepatocyte AdipoR2 mRNA specifically correlated with serum adiponectin and steatosis (p = .003), while hepatocyte AdipoR1 mRNA dropped in pronounced fibrosis (p = .060).	2008
adiponectin, C1Q and collagen domain containing(ADIPOQ)	18309113_4	We herein explore the effects of adiponectin on cardiac fibrosis induced by angiotensin II (Ang II).	2008
adiponectin, C1Q and collagen domain containing(ADIPOQ)	18309113_3	However, the role of adiponectin in cardiac fibrosis remains uncertain.	2008
adiponectin, C1Q and collagen domain containing(ADIPOQ)	18622247_8	Pioglitazone treatment also ameliorated left ventricular hypertrophy and fibrosis, improved diastolic function, and increased both the serum adiponectin concentration and the level of AMP-activated protein kinase phosphorylation in the heart.	2008
adiponectin, C1Q and collagen domain containing(ADIPOQ)	18309113_1	Adiponectin protects against angiotensin II-induced cardiac fibrosis through activation of PPAR-alpha.	2008
adiponectin, C1Q and collagen domain containing(ADIPOQ)	18565022_4	METHODS: Seventy-nine patients with histology-proven NAFLD (61 with simple steatosis and 18 with stage 2-4 fibrosis) and 40 controls were tested for the nucleotide polymorphisms at adiponectin -11 391, -11 377, +45, and +276 and TNF-alpha promoters -863, -308, and -238.	2008
adiponectin, C1Q and collagen domain containing(ADIPOQ)	18565022_5	RESULTS: There was no significant deviation in the adiponectin and TNF-alpha gene polymorphisms between NAFLD patients and controls, or between patients with simple steatosis and those with stage 2-4 fibrosis.	2008
adiponectin, C1Q and collagen domain containing(ADIPOQ)	18609175_8	In CHB/CHC, there was no significant association between steatosis or necroinflammation and levels of adipokines, while the presence of moderate/severe fibrosis (stages 4-6) was associated with higher leptin and adiponectin levels in male but not in female patients and with lower resistin levels irrespective of gender or other factors (adjusted odds ratio=0.788, p=0.035).	2008
adiponectin, C1Q and collagen domain containing(ADIPOQ)	18713296_10	Spearman's rank correlation coefficient analysis showed that the staining intensity of adiponectin negatively correlated with the grade of inflammation (r = -0.368, P = 0.045) and stage of fibrosis (r = -0.380, P = 0.038).	2008
adiponectin, C1Q and collagen domain containing(ADIPOQ)	18220291_12	Thus, adiponectin and AMPK inhibit HSC proliferation and hepatic fibrosis via multiple molecular mechanisms.	2008
adiponectin, C1Q and collagen domain containing(ADIPOQ)	19072370_5	However, circulating adipose-derived proteins such as leptin, adiponectin and resistin have important systemic effects, including the modulation of injury and fibrosis.	2008
adiponectin, C1Q and collagen domain containing(ADIPOQ)	18309113_10	CONCLUSIONS: The present study suggests that adiponectin protects against Ang II-induced cardiac fibrosis possibly through AMPK-dependent PPAR-alpha activation.	2008
adiponectin, C1Q and collagen domain containing(ADIPOQ)	18333370_4	The adipokines-leptin, adiponectin, TNF-alpha-, which are modified in obesity, have been proposed as determinant factors of non-responsiveness to the IFN-alpha/Ribavirin treatment and of liver fibrosis extension in patients with CHC and obesity.	2008
adiponectin, C1Q and collagen domain containing(ADIPOQ)	18098312_2	UNLABELLED: Adiponectin limits the development of liver fibrosis and activates adenosine monophosphate-activated protein kinase (AMPK).	2007
adiponectin, C1Q and collagen domain containing(ADIPOQ)	17626903_1	Exacerbation of albuminuria and renal fibrosis in subtotal renal ablation model of adiponectin-knockout mice.	2007
adiponectin, C1Q and collagen domain containing(ADIPOQ)	17626903_9	Treatment of APN-KO mice with adenovirus-mediated adiponectin resulted in amelioration of albuminuria, glomerular hypertrophy, and tubulointerstitial fibrosis and reduced the elevated levels of VCAM-1, MCP-1, TNF-alpha, TGF-beta1, collagen type I/III, and NADPH oxidase components mRNAs to the same levels as those in WT mice.	2007
adiponectin, C1Q and collagen domain containing(ADIPOQ)	18029322_11	No significant association was found between adiponectin levels and severity of steatosis, HCV RNA levels, HAI, transaminases, and fibrosis.	2007
adiponectin, C1Q and collagen domain containing(ADIPOQ)	17462782_1	Serum adiponectin is increased in advancing liver fibrosis and declines with reduction in fibrosis in chronic hepatitis B. BACKGROUND/AIMS: Despite the possible role of adiponectin in the pathogenesis of liver cirrhosis, few data have been collected from patients in different stages of liver fibrosis.	2007
adiponectin, C1Q and collagen domain containing(ADIPOQ)	17462782_6	CHB patients with stage 0-1 fibrosis had higher composition of high molecular weight (HMW) form of adiponectin when compared with CHB patients with liver cirrhosis [mean+/-SEM 51.2+/-2.1% vs. 40.9+/-1.7%, respectively, p=0.001].	2007
adiponectin, C1Q and collagen domain containing(ADIPOQ)	17462782_5	RESULTS: Serum adiponectin was detected at levels ranging over fourfold magnitude with advancing fibrosis stage and correlated positively with fibrosis stage [r=0.45, p<0.001].	2007
adiponectin, C1Q and collagen domain containing(ADIPOQ)	17462782_8	CONCLUSIONS: Serum adiponectin may have a role in fibrosis progression in CHB infection.	2007
adiponectin, C1Q and collagen domain containing(ADIPOQ)	17462782_9	A marked decline in serum adiponectin after antiviral therapy is associated with fibrosis reduction.	2007
adiponectin, C1Q and collagen domain containing(ADIPOQ)	19804285_7	The favorable effects of adiponectin are associated with attenuated inflammatory response, decreased myocyte death, decreased hypertrophic response, maintained ischemia-induced angiogenesis and reduced interstitial fibrosis.	2007
adiponectin, C1Q and collagen domain containing(ADIPOQ)	17912467_7	The serum level of total adiponectin significantly increased during the liver fibrosis development.	2007
adiponectin, C1Q and collagen domain containing(ADIPOQ)	17912467_5	The aim of our current study was to examine the alteration of each isoform of adiponectin and its receptors (AdipoR1, AdipoR2, and T-cadherin) during the choline-deficient L-amino acid-defined (CDAA) diet-induced rat liver fibrosis development.	2007
adiponectin, C1Q and collagen domain containing(ADIPOQ)	17912467_2	Adiponectin, a circulating adipocyte-derived secretory protein, reportedly plays an important role in liver fibrosis development, although the biological role of adiponectin in liver fibrogenesis is still controversial.	2007
adiponectin, C1Q and collagen domain containing(ADIPOQ)	17912467_1	Crosstalk between high-molecular-weight adiponectin and T-cadherin during liver fibrosis development in rats.	2007
adiponectin, C1Q and collagen domain containing(ADIPOQ)	17912467_12	Collectively, since the specific ligand and receptor were augmented together, crosstalk between HMW adiponectin and T-cadherin may play an important role during liver fibrosis development in rats.	2007
adiponectin, C1Q and collagen domain containing(ADIPOQ)	17418606_4	AIM: To determine if CF patients have altered adiponectin levels and if these levels correlate with glucose tolerance categories (normal, impaired glucose tolerance (IGT) and cystic fibrosis-related diabetes (CFRD)), insulin resistance or inflammatory markers such as fibrinogen and C-reactive protein (CRP).	2007
adiponectin, C1Q and collagen domain containing(ADIPOQ)	17418606_3	Since these conditions are common in cystic fibrosis (CF), we examined whether adiponectin values are altered in these patients.	2007
adiponectin, C1Q and collagen domain containing(ADIPOQ)	17418606_1	Normal adiponectin levels despite abnormal glucose tolerance (or diabetes) and inflammation in adult patients with cystic fibrosis.	2007
adiponectin, C1Q and collagen domain containing(ADIPOQ)	17331160_13	CONCLUSIONS: Hypoadiponectinemia is concluded to be involved in the etiology of hepatic steatosis independently of visceral adipose tissue content, and is considered to be an important factor in the progression of fibrosis; further studies will be necessary to elucidate the exact physiological role of adiponectin and its contribution to the progression of NASH.	2007
adiponectin, C1Q and collagen domain containing(ADIPOQ)	17331160_12	And there was a stepwise decrease in the serum adiponectin in parallel to the severity of hepatic fibrosis.	2007
adiponectin, C1Q and collagen domain containing(ADIPOQ)	17462782_7	After antiviral therapy, patients with fibrosis reduction had marked decline in serum adiponectin level and increase in HMW form of adiponectin [mean+/-SEM 43.5+/-1.2% vs. 37.0+/-3.0%, respectively, p=0.04].	2007
adiponectin, C1Q and collagen domain containing(ADIPOQ)	18061654_6	In contrast with disorders typically associated with excess adiposity and positive energy balance, adiponectin levels are elevated--rather than decreased--in classic chronic inflammatory/autoimmune diseases that are unrelated to increased adipose tissue, such as rheumatoid arthritis, SLE, inflammatory bowel disease, type 1 diabetes, and cystic fibrosis.	2007
adiponectin, C1Q and collagen domain containing(ADIPOQ)	18029322_8	Associations between serum adiponectin levels and grade of steatosis, histologic activity index (HAI), fibrosis grade of liver biopsies, patient age, HCV viral load, and serum transaminase activities were studied.	2007
adiponectin, C1Q and collagen domain containing(ADIPOQ)	17499764_14	Administration of adenovirus-mediated adiponectin in WT mice resulted in decreased LV dilatation and improved LV function that was associated with increased capillary density in the infarct border zone and decreased myocyte hypertrophy, diminished myocardial apoptosis and decreased interstitial fibrosis in the remote zone.	2007
adiponectin, C1Q and collagen domain containing(ADIPOQ)	17499764_15	These data suggest that adiponectin protects against the development of systolic dysfunction after myocardial infarction through its abilities to suppress cardiac hypertrophy and interstitial fibrosis, and protect against myocyte and capillary loss.	2007
adiponectin, C1Q and collagen domain containing(ADIPOQ)	21960798_5	Adiponectin is protective against liver fibrosis due to its anti-inflammatory effect, whereas inflammatory cytokines such as tumor necrosis factor-\xce\xb1 are detrimental for both fatty liver and pancreatic insulin release.	2007
adiponectin, C1Q and collagen domain containing(ADIPOQ)	17331160_7	We also investigated the relationship between the serum level of adiponectin and hepatic fibrosis.	2007
adiponectin, C1Q and collagen domain containing(ADIPOQ)	18068553_1	Adiponectin and body composition in cystic fibrosis.	2007
adiponectin, C1Q and collagen domain containing(ADIPOQ)	17459514_9	CONCLUSIONS: Our results indicate that lack of adiponectin enhances the progression of hepatic steatosis, fibrosis, and hepatic tumor formation in an animal model of NASH.	2007
adiponectin, C1Q and collagen domain containing(ADIPOQ)	17625437_2	OBJECTIVES: Steatosis and metabolic abnormalities seem to be frequent and deleterious in chronic hepatitis C. Changes in glucose homeostasis and in adiponectin levels, an adipokine with anti-inflammatory and insulin-sensitive properties, were evaluated in patients with chronic hepatitis C according to steatosis, liver fibrosis and body mass index.	2007
adiponectin, C1Q and collagen domain containing(ADIPOQ)	17059516_15	Reduced adiponectin levels may be involved in the pathogenesis of steatosis, which in turn accelerates progression of fibrosis in chronic HCV.	2006
adiponectin, C1Q and collagen domain containing(ADIPOQ)	16712671_8	Notably, decreased adiponectin levels were closely associated with the degree of hepatic steatosis, necroinflammation and fibrosis (P < 0.001 for all) among NAFLD patients.	2006
adiponectin, C1Q and collagen domain containing(ADIPOQ)	16712671_9	By logistic regression analysis, low adiponectin levels independently predicted hepatic steatosis [odds ratio (OR) 2.3, 95% confidence interval (CI) 1.5-5.8, P < 0.001] and necroinflammation (OR 3.1, 95% CI 1.9-7, P < 0.001), but not fibrosis (P = 0.07), after adjustment for age, sex, BMI, HOMA-IR and MetS components.	2006
adiponectin, C1Q and collagen domain containing(ADIPOQ)	16952281_4	Increased leptin and decreased adiponectin serum levels have been detected initially in patients with nonalcoholic steatohepatitis and more recently in patients with chronic hepatitis C compared to healthy controls in most but not all studies, while the data on the associations between these adipokine levels and the severity of hepatic steatosis or fibrosis are still rather conflicting.	2006
adiponectin, C1Q and collagen domain containing(ADIPOQ)	16952281_3	Given the frequent presence of hepatic steatosis in several chronic liver diseases, there is currently increasing interest in the role of these adipokines in the development of hepatic steatosis and also in necroinflammation and fibrosis, mostly in patients with nonalcoholic fatty liver disease or chronic hepatitis C. According to experimental data, reduced adiponectin levels and increased leptin…	2006
adiponectin, C1Q and collagen domain containing(ADIPOQ)	16952554_2	BACKGROUND & AIMS: Adiponectin, an adipose tissue-derived hormone, exhibits anti-inflammatory properties and has various biological functions, such as increasing insulin sensitivity, reducing hypertension, and suppressing atherosclerosis, liver fibrosis, and tumor growth.	2006
adiponectin, C1Q and collagen domain containing(ADIPOQ)	17059516_6	RESULTS: Chronic HCV patients with steatosis showed lower serum adiponectin levels and higher levels of TNF-alpha, HOMA, alanine aminotransferase, gamma-glutamiltransferase and Histological Activity Index (HAI) and fibrosis scores.	2006
adiponectin, C1Q and collagen domain containing(ADIPOQ)	16464949_1	Body composition and adiponectin serum concentrations in adult patients with cystic fibrosis.	2006
adiponectin, C1Q and collagen domain containing(ADIPOQ)	17143554_14	PGZ treatment was associated with increased serum adiponectin concentrations but did not decrease the severity of hepatic fibrosis induced by CCl4.	2006
adiponectin, C1Q and collagen domain containing(ADIPOQ)	17059516_5	METHODS: Adiponectin and tumour necrosis factor-alpha (TNF-alpha) levels, HCV genotypes, HCV-RNA, IR (HOMA-IR), body mass index and liver steatosis and fibrosis were assessed in 161 non-diabetic chronic HCV patients.	2006
adiponectin, C1Q and collagen domain containing(ADIPOQ)	15850790_2	Adiponectin, an adipose-derived hormone, exhibits various biological functions, such as increasing insulin sensitivity, protecting hypertension, and suppression of atherosclerosis, liver fibrosis, and tumor growth.	2005
adiponectin, C1Q and collagen domain containing(ADIPOQ)	15920151_1	The roles of leptin and adiponectin: a novel paradigm in adipocytokine regulation of liver fibrosis and stellate cell biology.	2005
adiponectin, C1Q and collagen domain containing(ADIPOQ)	15797948_7	When the measured histological parameters were included in the model, plasma adiponectin levels were also inversely proportional to the percentage of hepatic fat content (adjusted R(2), 0.221), whereas necroinflammation and fibrosis did not fit in the model.	2005
adiponectin, C1Q and collagen domain containing(ADIPOQ)	16135012_3	Recent studies have indicated that adiponectin suppresses inflammation, angiogenesis, and fibrosis, which are central pathogenic factors for endometriosis.	2005
adiponectin, C1Q and collagen domain containing(ADIPOQ)	16279898_6	When NASH patients were grouped according to the severity of histological liver damage, adiponectin was the only variable discriminating patients with higher necroinflammatory grade and fibrosis score from those with milder lesions.	2005
adiponectin, C1Q and collagen domain containing(ADIPOQ)	16279898_5	Serum adiponectin levels were also significantly lower in the NASH group than in the two control groups and correlated with adaptation index and with the severity of hepatic steatosis, necroinflammation, and fibrosis.	2005
adiponectin, C1Q and collagen domain containing(ADIPOQ)	15920151_2	Although leptin is a key adipokine promoting liver fibrosis, adiponectin may prevent liver injury.	2005
adiponectin, C1Q and collagen domain containing(ADIPOQ)	16265231_5	This review summarizes recent findings on the role of the adipocytokines adiponectin, leptin and resistin in the context of hepatic insulin resistance, fatty liver and liver fibrosis.	2005
adiponectin, C1Q and collagen domain containing(ADIPOQ)	16231364_3	Circulating adiponectin was lower in NASH compared with controls (5,476 +/- 344 vs. 11,548 +/- 836 ng/mL; P = .00001) and on multiple regression analysis correlated negatively with liver steatosis, necroinflammation (OR = 5.0; P = .009), and fibrosis (OR = 8.0; P = .003).	2005
adiponectin, C1Q and collagen domain containing(ADIPOQ)	15754775_14	Extensive liver fibrosis may develop in adiponectin-knockout mice and is alleviated by administration of recombinant adiponectin.	2005
adiponectin, C1Q and collagen domain containing(ADIPOQ)	15754775_16	The use of such biologically active molecules in lipid metabolism as ligands of PPARgamma and adiponectin might not help slim down a patient on the whole, but can potentially be used to halt the progression of liver fibrosis.	2005
adiponectin, C1Q and collagen domain containing(ADIPOQ)	16139921_3	METHODS: We studied 194 consecutive patients with untreated chronic HCV, to assess the relationship between adiponectin and its receptors and hepatic steatosis, fibrosis and inflammation.	2005
adiponectin, C1Q and collagen domain containing(ADIPOQ)	15920151_10	Adiponectin may act to reverse HSC activation, maintain HSC quiescence, or significantly, may have important therapeutic implications in liver fibrosis.	2005
adiponectin, C1Q and collagen domain containing(ADIPOQ)	16139921_5	However, there was no association between serum adiponectin and stage of fibrosis and lower levels of serum adiponectin were associated with the presence of steatosis in males only.	2005
adiponectin, C1Q and collagen domain containing(ADIPOQ)	15826715_2	BACKGROUND/AIMS: Models of fatty liver diseases and fibrosis suggest a hepatoprotective effect of adiponectin, an adipocyte-derived hormone with antidiabetic, antiobesity, antiatherogenic and anti-inflammatory effects.	2005
adiponectin, C1Q and collagen domain containing(ADIPOQ)	14724832_2	BACKGROUND & AIMS: Obesity is one of the risk factors for liver fibrosis, in which plasma adiponectin, an adipocytokine, levels are decreased.	2004
adiponectin, C1Q and collagen domain containing(ADIPOQ)	14724832_7	METHODS: The role of adiponectin on liver fibrosis induced by the administration of carbon tetrachloride twice a week for 12 weeks was tested by using adiponectin-knockout mice and an adenovirus-mediated adiponectin-expression system.	2004
adiponectin, C1Q and collagen domain containing(ADIPOQ)	15456087_7	RESULTS: The patients' fat showed higher values of apoptosis (P=0.005), fibrosis (P<0.05), vessel density (P=0.001) and macrophage infiltration (P<0.05) than the controls' fat, together with lower adiponectin and leptin mRNA levels and higher interleukin (IL)-6 and tumour necrosis factor (TNF)alpha mRNA levels.	2004
adiponectin, C1Q and collagen domain containing(ADIPOQ)	14724832_1	Enhanced carbon tetrachloride-induced liver fibrosis in mice lacking adiponectin.	2004
adiponectin, C1Q and collagen domain containing(ADIPOQ)	15265818_7	Adiponectin could suppress the development of atherosclerosis and liver fibrosis and might play a role as an antiinflammatory hormone.	2004
adiponectin, C1Q and collagen domain containing(ADIPOQ)	14724832_6	Adiponectin could have biological significances in liver fibrosis.	2004
adiponectin, C1Q and collagen domain containing(ADIPOQ)	14724832_13	CONCLUSIONS: The findings indicate that adiponectin attenuates liver fibrosis and could be a novel approach in its prevention.	2004
adiponectin, C1Q and collagen domain containing(ADIPOQ)	14724832_10	Injection of adenovirus producing adiponectin (AdADN) before carbon tetrachloride (1000 microL/kg body weight) treatment prevented liver fibrosis in wild-type mice (P < 0.001).	2004
ADP ribosylation factor like GTPase 6 interacting protein 1(ARL6IP1)	25553723_9	Histopathology of type 1 AIP presented dense lymphoplasmacytic infiltration, "snowstorm-like" fibrosis and abundant immunoglobulin (Ig) G4+ cells.	2015
ADP ribosylation factor like GTPase 6 interacting protein 1(ARL6IP1)	24629172_8	Though AIP-1 samples often had storiform fibrosis even in biopsies, PC did not show storiform fibrosis.	2014
ADP ribosylation factor like GTPase 6 interacting protein 1(ARL6IP1)	24424184_3	Apart from type 2 AIP, the characteristic features of type 1 AIP are increased serum IgG4 levels, lymphoplasmacytic sclerosing pancreatitis (abundant infiltration of IgG4+ plasmacytes and lymphocytes, storiform fibrosis, and obliterative phlebitis), extra-pancreatic manifestations of IgG4-RD (e.g.	2014
ADP ribosylation factor like GTPase 6 interacting protein 1(ARL6IP1)	23068298_4	There are 2 forms of the disease: (1) type 1 AIP characterized by storiform type fibrosis, obliterative phlebitis, and elevated numbers of immunoglobulin G4 (IgG4) positive plasma cells, typically >50 per high-power field, and, (2) type 2 AIP characterized by granulocytic epithelial lesions and only occasional IgG4-bearing plasma cells, typically <10 per high-power field.	2012
ADP ribosylation factor like GTPase 6 interacting protein 1(ARL6IP1)	22536257_5	Patients with Type 1 AIP have several immunologic and histologic abnormalities specific to the disease, including increased levels of serum IgG4 and storiform fibrosis with infiltration of lymphocytes and IgG4-positive plasmacytes in the involved organs.	2012
ADP ribosylation factor like GTPase 6 interacting protein 1(ARL6IP1)	21452084_4	Moreover, patients with type 1 AIP often have extrapancreatic lesions, such as sclerosing cholangitis, sclerosing sialadenitis, or retroperitoneal fibrosis, showing pathological features similar to those of the pancreatic lesions.	2011
ADP ribosylation factor like GTPase 6 interacting protein 1(ARL6IP1)	21170607_3	Apart from type 2 AIP, the pathological features of type 1 AIP with increased serum IgG4/IgE levels, abundant infiltration of IgG4+ plasmacytes and lymphocytes, fibrosis, and steroid responsiveness are suggestive of abnormal immunity such as allergy or autoimmunity.	2010
ADP ribosylation factor like GTPase 6 interacting protein 1(ARL6IP1)	21170607_4	Moreover, the patients with type 1 AIP often have extrapancreatic lesions such as sclerosing cholangitis, sclerosing sialadenitis, or retroperitoneal fibrosis showing similar pathological features.	2010
ADP ribosylation factor like GTPase 6 interacting protein 4(ARL6IP4)	18460977_11	In grade 4 AIP, which is characterized by advanced fibrosis, cellularity and expression of cytokines and their receptors were greatly reduced.	2008
ADP ribosylation factor like GTPase 6 interacting protein 4(ARL6IP4)	16773691_7	Histologically, thickening of the gallbladder was detected in 6 of 8 (75%) patients with AIP; 4 cases had transmural lymphoplasmacytic infiltration with fibrosis, and 2 cases had mucosal-based lymphoplasmacytic infiltration.	2006
ADP ribosylation factor like GTPase 6 interacting protein 5(ARL6IP5)	25068679_5	RESULTS: We identified 11 cases of IgG4-RD: 4 cases of IgG4-related autoimmune pancreatitis (AIP), 5 cases of IgG4-related retroperitoneal fibrosis (RPF)/ periaortitis, 2 cases of IgG4-related sialadenitis and one of IgG4-related interstitial nephritis.	2014
ADP-ribosyltransferase 1(ART1)	21592994_11	CONCLUSIONS: Biomarkers of Inflammation (CRP, IL-6), coagulation (D-dimer), and tissue fibrosis (HA) measured pre-ART and at 1 month are associated with higher risk of AIDS events, IRIS, or death, warranting additional study as risk stratification strategies.	2011
ADP-ribosyltransferase 1(ART1)	16627471_5	ADP-ribosylated HNP-1 was identified in bronchoalveolar lavage fluid (BALF) from patients with asthma, idiopathic pulmonary fibrosis, or a history of smoking (and having two common polymorphic forms of ART1 that differ in activity), but not in normal volunteers or patients with lymphangioleiomyomatosis.	2006
adrenoceptor alpha 1D(ADRA1D)	25909171_6	Furthermore, reintroduction of miR-122 suppressed TGF-\xce\xb2-induced expression of fibrosis-related genes, including alpha smooth muscle actin (\xce\xb1-SMA), fibronectin 1 (FN1) and \xce\xb11 type I collagen (COL1A1), in HSCs and fibroblasts.	2015
adrenoceptor alpha 1D(ADRA1D)	25888683_13	Likewise, transverse aortic constriction-elicited increases in hypertrophic markers and interstitial fibrosis were blunted in the knockout animals CONCLUSION: PC-1 is a cardiomyocyte mechanosensor that is required for cardiac hypertrophy through a mechanism that involves stabilization of \xce\xb11C protein.	2015
adrenoceptor alpha 1D(ADRA1D)	26352268_6	for cystic fibrosis or alpha-1-antitrypsin deficiency, but also for vaccination purposes.	2015
adrenoceptor alpha 1D(ADRA1D)	26122378_6	RESULTS: XYXD treatment reduced CCl4-induced liver fibrosis and decreased hepatic hydroxyproline (Hyp) content, the mRNA levels of smooth muscle actin (\xce\xb1-SMA) and Col 1(\xce\xb11) in fibrotic liver.	2015
adrenoceptor alpha 1D(ADRA1D)	25783327_7	Varices were secondary to: biliary atresia (n=8), portal vein thrombosis (n=5), alpha-1-anti-trypsin deficiency (n=1), cystic fibrosis (n=1), intrahepatic cholestasis (n=1), sclerosing cholangitis (n=1) and nodular hyperplasia with arterio-portal shunt (n=1).	2015
adrenoceptor alpha 1D(ADRA1D)	26406609_1	Adenosine A1 receptor activation attenuates cardiac hypertrophy and fibrosis in response to \xce\xb11 -adrenoceptor stimulation in vivo.	2015
adrenoceptor alpha 1D(ADRA1D)	25646700_10	Eplerenone administration was associated to a reduction in histological steatosis and attenuation of liver fibrosis development, which was associated to a significant decrease in the expression of collagen-\xce\xb11, collagen type III, alpha 1 and Matrix metalloproteinase-2.	2015
adrenoceptor alpha 1D(ADRA1D)	25562561_3	The differential diagnosis includes cystic fibrosis (CF), immunodeficiency disorders, complement deficiency, allergic bronchopulmonary aspergillosis, alpha-1 antitrypsin disease, repeated aspiration pneumonia, foreign body, bronchial carcinoid, unresolved right middle lobe pneumonia, and primary ciliary dyskinesia (PCD).	2015
adrenoceptor alpha 1D(ADRA1D)	26567105_5	There is also rising evidence that impairment of protein homeostasis contributes to early sporadic disease onset in pediatric lung diseases beyond the well-known hereditary proteostasis disorders such as cystic fibrosis and alpha-1 antitrypsin (AAT) deficiency.	2015
adrenoceptor alpha 1D(ADRA1D)	25814186_11	We observed a slight reduction in Collagen1\xce\xb11 mRNA expression and no reduction in the mRNA expression of other markers of fibrosis, inflammation or steatosis (TGF\xce\xb2, TNF\xce\xb1, \xce\xb12-MG, or SREBP-1c).	2015
adrenoceptor alpha 1D(ADRA1D)	26440278_6	The drastic development of fibrosis was characterized by intense sirius red staining and associated with an increased expression of genes encoding extracellular matrix proteins such as fibronectin, procollagen type 1\xce\xb11 and type 3\xce\xb11 and especially connective tissue growth factor (CTGF).	2015
adrenoceptor alpha 1D(ADRA1D)	25701506_9	In addition, administration of HDND-7 significantly attenuated liver fibrosis, as evident by the dramatic down-regulation of \xce\xb1-smooth muscle actin (\xce\xb1-SMA) and type I collagen alpha-1 (Col1\xce\xb11) in both mRNA and protein levels in vivo and in vitro.	2015
adrenoceptor alpha 1D(ADRA1D)	25807371_10	Furthermore, we confirmed the altered expression of microfibril-associated glycoprotein 4 (MFAP4), lumican (LUM), and collagen alpha-1(XIV) chain (COL14A1) in association to hepatic fibrosis.	2015
adrenoceptor alpha 1D(ADRA1D)	26556479_7	Suppression of pancreatic fibrosis upon administration of RA was confirmed based on reduction of histological damage, \xce\xb1-smooth muscle actin (\xce\xb1-SMA) expression and mRNA levels of \xce\xb2-catenin, platelet-derived growth factor (PDGF)-R\xce\xb2 transforming growth factor (TGF)-\xce\xb2RII and collagen 1\xce\xb11 in vivo.	2015
adrenoceptor alpha 1D(ADRA1D)	26268926_7	Histologically, Wnt inhibition reduced fibrosis as measured by \xce\xb1-smooth muscle actin positive myofibroblasts and collagen type I \xce\xb11 synthesis.	2015
adrenoceptor alpha 1D(ADRA1D)	26352268_14	Taken together, these data show that aerosolisation of cationic IVT mRNA complexes constitute a potentially powerful means to transfect cells in the lung with the purpose of protein replacement for genetic diseases such as cystic fibrosis or alpha-1-antitrypsin deficiency or for infectious disease vaccines, while bringing along the advantages of IVT mRNA as compared to pDNA as transfection agent.	2015
adrenoceptor alpha 1D(ADRA1D)	25617466_4	We measured changes in: (1) plasma osmolality and prolactin (PRL) levels; (2) pituitary expression of prolactin (PRL) and its receptors, PRLR1 and PRLR2; (3) branchial expression of PRLR1, PRLR2, Na(+)/Cl(-) co-transporter (NCC), Na(+)/K(+)/2Cl(-) co-transporter (NKCC), \xce\xb11a and \xce\xb11b isoforms of Na(+)/K(+)-ATPase (NKA), cystic fibrosis transmembrane conductance regulator (CFTR), aquap…	2015
adrenoceptor alpha 1D(ADRA1D)	26122378_10	CONCLUSION: XYXD treatment attenuates liver fibrosis by inhibiting HSC activation via inhibition of NF-\xce\xbaB and TGF-\xce\xb21 signaling pathway, thereby blocking the synthesis of Col1 (\xce\xb11) and TIMP-1.	2015
adrenoceptor alpha 1D(ADRA1D)	26135640_6	Aquaporin paralogs aqp1a, -3a, -8aa, -8ab, -10a, and -10b, two Na(+),K(+)-ATPase alpha-1 subunit isoforms (nka547, nka976), Na(+),K(+),2Cl(-)-, and Na(+),Cl(-)-cotransporters (nkcc1a, nkcc2, ncc), the cystic fibrosis transmembrane conductance regulator (cftr) and two claudin isoforms (cldn2, cldn15a) were expressed in the intestine and kidney in all groups.	2015
adrenoceptor alpha 1D(ADRA1D)	25897748_2	The University of Vermont College of Medicine and the Vermont Lung Center, in collaboration with the NHLBI, Alpha-1 Foundation, American Thoracic Society, European Respiratory Society, International Society for Cell Therapy, and the Pulmonary Fibrosis Foundation, convened a workshop, "Stem Cells and Cell Therapies in Lung Biology and Lung Diseases," held July 29 to August 1, 2013 at the Universit…	2015
adrenoceptor alpha 1D(ADRA1D)	26539962_12	Finally, macrophage depletion down-regulated the expression of genes associated with cardiac remodeling and fibrosis: transforming growth factor beta-1 (by 80%) collagen type III alpha-1 (by 71%) and atrial natriuretic factor (by 86%).	2015
adrenoceptor alpha 1D(ADRA1D)	26514513_2	BACKGROUND: In this study, influence caused by expression plasmids of connective tissue growth factor (CTGF) and tissue inhibitor of metalloproteinase-1 (TIMP-1) short hairpin RNA (shRNA) on mRNA expression of CTGF,TIMP-1,procol-\xce\xb11 and PCIII in hepatic tissue with hepatic fibrosis, a precancerous condition, in rats is analyzed.	2015
adrenoceptor alpha 1D(ADRA1D)	26086199_9	Less fibrosis was associated with reduced profibrotic transforming growth factor-beta, (TGF-\xce\xb21) connective tissue growth factor (CTGF), and collagen type I alpha 1 (COL-1a1) mRNA levels.	2015
adrenoceptor alpha 1D(ADRA1D)	26320250_6	Moreover, these enzymes intimately correlated with the fibrosis parameter [procollagen \xce\xb11(III)].	2015
adrenoceptor alpha 1D(ADRA1D)	26374068_5	Compared to AOM-treated WT mice, M1R-deficient mice had attenuated liver nodularity, fibrosis and ductular proliferation, \xce\xb1-SMA staining, and expression of \xce\xb11 collagen, Tgf\xce\xb2-R, Pdgf-R, Mmp-2, Timp-1 and Timp-2.	2015
adrenoceptor alpha 1D(ADRA1D)	25967348_10	In addition, transforming growth factor (TGF)-\xce\xb2, collagen I-\xce\xb11, tissue inhibitor of metalloproteinase 1 (TIMP-1) and \xce\xb1-smooth muscle actin (SMA) mRNA expression, which are markers of hepatic fibrosis, were markedly inhibited by EGCG treatment.	2015
adrenoceptor alpha 1D(ADRA1D)	26338300_4	APPROACH AND RESULTS: Four to 6 weeks after permanent coronary artery occlusion, transgenic rats with cardiomyocyte-specific \xce\xb11A-adrenergic receptor overexpression had less remodeling than their nontransgenic littermates, with less fibrosis, hypertrophy and lung weight, and preserved left ventricular ejection fraction and wall stress (all P<0.05).	2015
adrenoceptor alpha 1D(ADRA1D)	25593566_4	A glyco-indicator based on the glyco-alteration of serum \xce\xb11-acid glycoprotein, LecT-Hepa, was discovered by glycomics technologies as a robust indicator of liver fibrosis.	2015
adrenoceptor alpha 1D(ADRA1D)	26494620_4	In this report we show that the PiZ mouse, transgenic for the common misfolded variant \xce\xb11-antitrypsin Z, is a model of respiratory epithelial cell proteinopathy with spontaneous pulmonary fibrosis.	2015
adrenoceptor alpha 1D(ADRA1D)	26494620_5	Intracellular accumulation of misfolded \xce\xb11-antitrypsin Z in respiratory epithelial cells of the PiZ model resulted in activation of autophagy, leukocyte infiltration, and spontaneous pulmonary fibrosis severe enough to elicit functional restrictive deficits.	2015
adrenoceptor alpha 1D(ADRA1D)	26096209_3	Here we present in vivo evidence of an up to 90% suppression of procollagen \xce\xb11(I) expression, a reduction of septa formation, and a 40%-60% decrease of collagen deposition in mice with progressive and advanced liver fibrosis that received cationic lipid nanoparticles loaded with small interfering RNA to the procollagen \xce\xb11(I) gene.	2015
adrenoceptor alpha 1D(ADRA1D)	26096209_1	Specific hepatic delivery of procollagen \xce\xb11(I) small interfering RNA in lipid-like nanoparticles resolves liver fibrosis.	2015
adrenoceptor alpha 1D(ADRA1D)	26096209_4	After intravenous injection, up to 90% of lipid nanoparticles loaded with small interfering RNA to the procollagen \xce\xb11(I) gene were retained in the liver of fibrotic mice and accumulated in nonparenchymal more than parenchymal cells for prolonged periods, significantly ameliorating progression and accelerating regression of fibrosis.	2015
adrenoceptor alpha 1D(ADRA1D)	26108259_7	Alcohol increased fibrosis as indicated by increased mRNA and/or protein for collagens \xce\xb11(I), \xce\xb12(I), \xce\xb11(III), and \xce\xb12(IV) as well as hydroxyproline.	2015
adrenoceptor alpha 1D(ADRA1D)	25099270_8	The expression of atrial natriuretic peptide and procollagen type1 \xce\xb1-1, hypertrophy marker and fibrosis one, respectively, was detected by real-time PCR.	2014
adrenoceptor alpha 1D(ADRA1D)	25290944_5	Fibrosis was induced by treating rat lung slices with 1ng/ml TGF-\xce\xb21 and 2.5\xce\xbcM CdCl2, quantified by measuring the content of hydroxyproline, and confirmed by detecting the expression of collagen type III alpha 1 (Col3\xce\xb11) and connective tissue growth factor (CTGF) genes.	2014
adrenoceptor alpha 1D(ADRA1D)	25528655_8	The only significant positive relationship between laboratory data and histological findings observed was that between levels of urinary \xce\xb11 microglobulin (u-\xce\xb11MG) excretion and the percentage of tubular atrophy and interstitial fibrosis (r\xc2\xa0=\xc2\xa00.67, p\xc2\xa0=\xc2\xa00.035).	2014
adrenoceptor alpha 1D(ADRA1D)	25533003_6	RESULTS: Increased severity of fibrosis was associated with higher tyrosine, phenylalanine, methionine, citrate and, very-low-density lipoprotein (vLDL) and lower creatine, low-density lipoprotein (LDL), phosphatidylcholine, and N-Acetyl-\xce\xb11-acid-glycoprotein.	2014
adrenoceptor alpha 1D(ADRA1D)	24983336_5	RESULTS: Both MOD EX and VIG EX effectively lowered hepatic triglycerides, serum alanine aminotransferase (ALT), perivenular fibrosis, and hepatic collagen 1\xce\xb11 messenger RNA (mRNA) expression (vs O-SED, P < 0.05).	2014
adrenoceptor alpha 1D(ADRA1D)	25070245_1	\xce\x91\xe2\x82\x81-antitrypsin PiMZ heterozygosity has an independent aggravating effect on liver fibrosis in alcoholic liver disease.	2014
adrenoceptor alpha 1D(ADRA1D)	25098608_2	In order to investigate how changes in gill Na(+) , K(+) -ATPase (NKA) \xce\xb11a and \xce\xb11b subunits, Na(+) , K(+) , 2Cl(-) co-transporter (NKCC1) and the apical cystic fibrosis trans-membrane conductance regulator-I (CFTR-I) transcripts in wild strain of Atlantic salmon, Salmo salar, smolts are affected by temperature during spring, hatchery-reared parr (mean \xc2\xb1 s.e.	2014
adrenoceptor alpha 1D(ADRA1D)	25548740_1	Serum transferrin as a liver fibrosis biomarker in patients with chronic hepatitis B. BACKGROUND/AIMS: Transferrin and alpha-1 antitrypsin are reportedly associated with liver fibrosis.	2014
adrenoceptor alpha 1D(ADRA1D)	25548740_2	We evaluated the usefulness of serum transferrin and alpha-1 antitrypsin as new liver fibrosis markers in patients with chronic hepatitis B.	2014
adrenoceptor alpha 1D(ADRA1D)	24376856_4	Here we present the development of two competitive enzyme-linked immunosorbent assays (ELISAs) for assessing the levels of specific fragments of type IV collagen \xce\xb11 (C4M12a1) and \xce\xb13 (C4M12a3) chains in serum as indicators of fibrosis.	2014
adrenoceptor alpha 1D(ADRA1D)	24376856_1	MMP mediated degradation of type IV collagen alpha 1 and alpha 3 chains reflects basement membrane remodeling in experimental and clinical fibrosis--validation of two novel biomarker assays.	2014
adrenoceptor alpha 1D(ADRA1D)	25220332_3	We determined whether immune responses to lung self-Ags, K-alpha-1-tubulin (K\xce\xb11T) and Collagen V (Col-V) in the absence of alloimmunity, could promote airway inflammation and fibrosis.	2014
adrenoceptor alpha 1D(ADRA1D)	24983314_7	The collagen-binding receptor integrin \xce\xb11\xce\xb21 was required for recruitment of TCPTP to the T\xce\xb2RII tail, as mice lacking this integrin exhibited impaired TCPTP-mediated tyrosine dephosphorylation of T\xce\xb2RII that led to severe fibrosis in a unilateral ureteral obstruction model of renal fibrosis.	2014
adrenoceptor alpha 1D(ADRA1D)	24835978_8	Thus, these novel findings demonstrate that EGFR transactivation by \xce\xb11aAR-247R leads to hyperproliferation, hypertrophy and alterations in cardiomyoblasts, suggesting that these unique genetically-mediated alterations in signaling pathways and cellular function may lead to myocardial fibrosis.	2014
adrenoceptor alpha 1D(ADRA1D)	24498058_2	The classical form of \xce\xb11-antitrypsin deficiency (ATD) is associated with hepatic fibrosis and hepatocellular carcinoma.	2014
adrenoceptor alpha 1D(ADRA1D)	25445048_9	Moreover, PGC-1\xce\xb1 was demonstrated to inhibit \xce\xb11(I) collagen (a marker for liver fibrosis) transcription in cultured HSCs.	2014
adrenoceptor alpha 1D(ADRA1D)	25150830_9	After 7 days, the severity of renal fibrosis and expression of fibrotic markers, including collagen 1\xce\xb11/3\xce\xb11, fibronectin, and \xce\xb1-smooth muscle actin, were markedly increased in UUO compared with sham mice.	2014
adrenoceptor alpha 1D(ADRA1D)	25393161_7	RESULTS: Eight hundred eleven data sets from consecutive patients referred to our PR center before LTx could be analysed (COPD, 360; \xce\xb1-1-antitrypsin deficiency, 127; interstitial lung disease, 195; cystic fibrosis, 69; other, 60).	2014
adrenoceptor alpha 1D(ADRA1D)	25393161_5	We compared data of patients with COPD, \xce\xb1-1-antitrypsin deficiency, interstitial lung disease, or cystic fibrosis before and after PR with regard to exercise capacity (6-min walking distance [6MWD]) and health-related quality of life (HRQL; SF36).	2014
adrenoceptor alpha 1D(ADRA1D)	25045122_8	The serum biochemistry, the liver contents of 5-HT and hydroxyproline (HYP), and the expression of fibrosis-related genes (including TGF-\xce\xb21, matrix metalloproteinase 2, procollagen \xce\xb11, and \xce\xb1-SMA messenger RNA) were determined.	2014
adrenoceptor alpha 1D(ADRA1D)	25132968_3	The most common indications for LTx in adults remain to be chronic obstructive pulmonary disease, idiopathic pulmonary fibrosis, cystic fibrosis, alpha-1 antitrypsin deficiency, and idiopathic pulmonary arterial hypertension.	2014
adrenoceptor alpha 1D(ADRA1D)	24797980_5	Viral hepatitis, autoimmune, metabolic liver diseases (Wilson disease, alpha-1-antitrypsin deficiency, cystic fibrosis) and drug and toxin-induced liver injury were excluded in all children.	2014
adrenoceptor alpha 1D(ADRA1D)	25528655_12	The levels of u-\xce\xb11MG excretion reflect the degrees of tubular atrophy and interstitial fibrosis.	2014
adrenoceptor alpha 1D(ADRA1D)	25432063_12	In conclusion, intracellular S1P plays a crucial role in the TGF-\xce\xb21-induced expression of Col \xce\xb11(I) and Col \xce\xb11(III), which is required for human fibrosis development.	2014
adrenoceptor alpha 1D(ADRA1D)	24548076_2	Gene therapy of the lung has the potential to treat life-threatening diseases such as cystic fibrosis and \xce\xb1(1)-antitrypsin or surfactant deficiencies.	2014
adrenoceptor alpha 1D(ADRA1D)	25074909_4	To identify distinct populations of myofibroblasts and quantify their contribution to hepatic fibrosis of two different etiologies, collagen-\xce\xb11(I)-GFP mice were subjected to hepatotoxic (carbon tetrachloride; CCl4) or cholestatic (bile duct ligation; BDL) liver injury.	2014
adrenoceptor alpha 1D(ADRA1D)	24380698_4	This study determines the role of defensins, produced by neutrophils, and its interaction with \xce\xb1-1-antitrypsin (AAT) towards induction of airway inflammation and fibrosis which are characteristic hallmarks of BOS.	2014
adrenoceptor alpha 1D(ADRA1D)	25406061_3	To identify global principles of misfolding disease pathology we examined the impact of the local folding environment in alpha-1-antitrypsin deficiency (AATD), Niemann-Pick type C1 disease (NPC1), Alzheimer's disease (AD), and cystic fibrosis (CF).	2014
adrenoceptor alpha 1D(ADRA1D)	23911435_10	Utilizing Collagen1\xce\xb11-GFP reporter mice, we confirmed that the majority of Sca1+ adventitial cells expressed type I collagen, an abundant component of cardiac fibrosis, in both wt (71%\xc2\xb14.1) and mdx (77%\xc2\xb13.5) hearts.	2013
adrenoceptor alpha 1D(ADRA1D)	23733885_9	At 42 weeks, LivKO mice showed increased hepatic oxidative stress, plasma aminotransferases, and hepatic mRNAs for genes involved in fibrosis and inflammation, such as \xce\xb1-smooth muscle actin, collagen type 1 \xce\xb11, tumor necrosis factor \xce\xb1, and interleukin-1\xce\xb2.	2013
adrenoceptor alpha 1D(ADRA1D)	24239723_11	The expressions of fibrosis markers \xce\xb1-SMA, \xce\xb11 (I) collagen and sirius red staining in the liver revealed the induction of fibrosis.	2013
adrenoceptor alpha 1D(ADRA1D)	23707755_9	As anticipated from these findings, livers from pilocarpine-treated mice exhibited reduced expression of key players in fibrosis (\xce\xb11 collagen, \xce\xb1-smooth muscle actin, TGF-\xce\xb21, PGDF, TGF-\xce\xb21R, PGDFR) and decreased mRNA levels for molecules that regulate extracellular matrix formation (TIMP-1, TIMP-2, MMP-2, MMP-13).	2013
adrenoceptor alpha 1D(ADRA1D)	23303872_9	The capacity of dietary DHA to suppress hepatic markers of inflammation (Clec4F, F4/80, Trl4, Trl9, CD14, Myd88), fibrosis (Procol1\xce\xb11, Tgf\xce\xb21), and oxidative stress (NADPH oxidase subunits Nox2, p22phox, p40phox, p47phox, p67phox) was significantly greater than dietary EPA.	2013
adrenoceptor alpha 1D(ADRA1D)	23666168_11	Other diagnoses included neonatal hepatitis, total parenteral nutrition cholestasis, Alagille syndrome, cystic fibrosis, choledochal cyst, hypothyroidism, alpha-1 antitrypsin deficiency and persistent cholestasis of unknown etiology.	2013
adrenoceptor alpha 1D(ADRA1D)	23760020_8	Immunofluorescence microscopy revealed the presence of two types of MRCs distinctly different in sizes, and confirmed that the reduction in Nka \xce\xb11a expression, and the prominent increases in expression of Nka \xce\xb11b, Na(+):K(+):2Cl(-) cotransporter 1, and cystic fibrosis transmembrane conductance regulator Cl(-) channel coincided with the salinity-induced apoptotic event.	2013
adrenoceptor alpha 1D(ADRA1D)	23414180_6	Patients with glomerular lesions had higher urinary albumin than those with normal histology, while those with interstitial fibrosis and tubular atrophy plus inflammation (ci>0, cg = 0, i>0) had higher levels of IgG, IgM, \xce\xb1-1-microglobulin and RBP.	2013
adrenoceptor alpha 1D(ADRA1D)	24045874_9	Treatment with each compound significantly decreased expression of fibrosis-related genes, such as type I collagen \xce\xb11 (col1\xce\xb11), \xce\xb1-SMA and TGF-\xce\xb21 (P < 0.05).	2013
adrenoceptor alpha 1D(ADRA1D)	24121950_7	The effects of DHLHZn on AMA-induced fibrosis were evaluated by measuring the expression of transforming growth factor (TGF)-\xce\xb21 and collagen \xce\xb11 (I).	2013
adrenoceptor alpha 1D(ADRA1D)	24265781_2	BACKGROUND: IL-17-dependent cellular immune responses to the \xce\xb11 chain of collagen type V are associated with development of bronchiolitis obliterans syndrome after lung transplantation, and with idiopathic pulmonary fibrosis and coronary artery disease, primary indications for lung or heart transplantation, respectively.	2013
adrenoceptor alpha 1D(ADRA1D)	25949144_9	In the ED, BPA treatment caused expressional increases of carbonic anhydrase II, cystic fibrosis transmembrane regulator, Na(+)/K(+) ATPase \xce\xb11 subunit, and aquaporin (AQP) 1.	2013
adrenoceptor alpha 1D(ADRA1D)	23381957_5	Hepatocyte TFEB gene transfer resulted in dramatic reduction of hepatic ATZ, liver apoptosis and fibrosis, which are key features of alpha-1-anti-trypsin deficiency.	2013
adrenoceptor alpha 1D(ADRA1D)	24136814_8	Pulmonary indications included cystic fibrosis (CF) (n\xe2\x80\x89=\xe2\x80\x893), idiopathic pulmonary fibrosis (n\xe2\x80\x89=\xe2\x80\x892), \xce\xb11-antitrypsin deficiency (AATD) (n\xe2\x80\x89=\xe2\x80\x891) and pulmonary hypertension (n\xe2\x80\x89=\xe2\x80\x892).	2013
adrenoceptor alpha 1D(ADRA1D)	23582094_9	Although TGF-\xce\xb21, CTGF, COL1-\xce\xb11, and COL3-\xce\xb11 mRNA levels were reduced by unloading, there was only a modest reduction in tissue fibrosis and no difference in protein-bound hydroxyproline concentration between pre- and post-LVAD tissue samples.	2013
adrenoceptor alpha 1D(ADRA1D)	24160908_2	In our previous study, we have identified a PCBP2 siRNA that exhibits antifibrotic activity in rat hepatic stellate cells (HSCs) by inhibition of \xce\xb1CP2, a protein responsible for stabilization of the collagen \xce\xb11 (I) mRNA in alcoholic liver fibrosis.	2013
adrenoceptor alpha 1D(ADRA1D)	23458413_8	It could also decrease expression levels of profibrosis factors transforming growth factor-\xce\xb2, Col1a1 (collagen type 1, \xce\xb11), and Col3a1, and inhibit fibrosis progress.	2013
adrenoceptor alpha 1D(ADRA1D)	24084714_5	In this study, we investigated SAHA's effects on the expression of collagen III alpha 1 (COL3A1) in primary human IPF fibroblasts and in a murine model of pulmonary fibrosis.	2013
adrenoceptor alpha 1D(ADRA1D)	23467423_8	Downregulation of miR-29c was associated with significant increases in interstitial fibrosis, collagen type II \xce\xb11 (COL2A1) protein, and tropomyosin 1\xce\xb1 (TPM1) protein in rat remnant kidneys and in kidneys from IgA nephropathy patients.	2013
adrenoceptor alpha 1D(ADRA1D)	23460364_7	Importantly, experimental liver fibrosis was significantly ameliorated in CCR9(-/-) mice compared with wild-type (WT) mice, assessed by \xce\xb1-smooth muscle actin (\xce\xb1-SMA) immunostain, Sirius red staining, and messenger RNA (mRNA) expression levels of \xce\xb1-SMA, collagen 1\xce\xb11, transforming growth factor (TGF)-\xce\xb21, and tissue inhibitor of metalloproteinase (TIMP)-1.	2013
adrenoceptor alpha 1D(ADRA1D)	23977848_7	Using a small molecule Nox4/Nox1 inhibitor, we demonstrate that targeting Nox4 results in attenuation of an established fibrotic response, with reductions in gene transcripts for the extracellular matrix components collagen 1\xce\xb11, collagen 3\xce\xb11, and fibronectin and in principle pathway components associated with pulmonary fibrosis and hypoxia-mediated vascular remodeling: transforming …	2013
adrenoceptor alpha 1D(ADRA1D)	23622660_9	Two patients had chronic obstructive pulmonary disease, one alpha-1 trypsin deficiency, and two idiopathic pulmonary fibrosis.	2013
adrenoceptor alpha 1D(ADRA1D)	23572194_8	Main diagnoses were \xce\xb1-1 antitrypsin deficiency (n=35), chronic obstructive pulmonary disease (n=41), cystic fibrosis (n=10), interstitial lung disease (n=34) and pulmonary arterial hypertension (n=32).	2013
adrenoceptor alpha 1D(ADRA1D)	23845868_6	RESULTS: Patients with IPF had higher BALF pepsin concentrations and a greater frequency of acute rejection than those with \xce\xb11-antitrypsin deficiency, cystic fibrosis, or chronic obstructive pulmonary disease (P = 0.037).	2013
adrenoceptor alpha 1D(ADRA1D)	23845868_5	The BALF pepsin concentrations and the results of transbronchial biopsy, esophageal function testing, barium swallow, and gastric emptying scan were compared among those with the most common end-stage lung diseases requiring lung transplantation: IPF, chronic obstructive pulmonary disease, cystic fibrosis, and \xce\xb11-antitrypsin deficiency.	2013
adrenoceptor alpha 1D(ADRA1D)	23486519_6	Therefore, we targeted posttranslational core fucosylation, regulated by \xce\xb1-1,6 fucosyltransferase (FUT8), by adenoviral-mediated knockdown of FUT8 mRNA in vivo and measured TGF-\xce\xb2RII and ALK5 expression and the progression of renal fibrosis.	2013
adrenoceptor alpha 1D(ADRA1D)	22283686_4	C57/BL6 female mice wild-type (WT) or Col 1\xce\xb11(r/r) male BM transplant, received supraphysiological doses of cerulein to induce pancreatic fibrosis.	2012
adrenoceptor alpha 1D(ADRA1D)	22880035_1	Mucosal healing and fibrosis after acute or chronic inflammation in wild type FVB-N mice and C57BL6 procollagen \xce\xb11(I)-promoter-GFP reporter mice.	2012
adrenoceptor alpha 1D(ADRA1D)	23240459_14	Gene therapy based on inhalation of gene preparations offers an alternative way for the treatment of patients suffering from such lung diseases as cystic fibrosis, alpha-1-antitrypsin defect, or cancer.	2012
adrenoceptor alpha 1D(ADRA1D)	23247798_7	RESULTS: Compared to controls, telmisartan monotherapy had no significant influence on hydroxyproline; however, telmisartan plus propranolol reduced hydroxyproline (TP 3 months, p = 0.008), fibrosis score (TP 3 months and TP 8 months, p = 0.043 and p = 0.008, respectively; TP delayed 8 months, p < 0.0005), bile duct proliferation (TP 8 months and TP delayed 8 months, p = 0.006 and p < 0.0005, res…	2012
adrenoceptor alpha 1D(ADRA1D)	22535703_3	LecT-Hepa, a new glyco-marker derived from fibrosis-related glyco-alteration of serum alpha 1-acid glycoprotein, was used to differentiate cirrhosis from chronic hepatitis in a single-center study.	2012
adrenoceptor alpha 1D(ADRA1D)	22642257_3	Here we describe both cell and gene therapies for lung diseases such as cystic fibrosis and alpha-1 antitrypsin disorder as well as fatty acid oxidation disorders that mimic sudden infant death syndrome (SIDS).	2012
adrenoceptor alpha 1D(ADRA1D)	22642257_4	Human clinical gene therapy trials for cystic fibrosis and alpha-1 antitrypsin have been performed using a variety of vectors including adenovirus, adeno-associated virus, and nonviral vectors.	2012
adrenoceptor alpha 1D(ADRA1D)	22697345_4	Cystic fibrosis (CF) and alpha-1 antitrypsin (AAT) deficiency are two major clinically relevant pulmonary disorders associated with protein misfolding.	2012
adrenoceptor alpha 1D(ADRA1D)	22697347_8	In contrast, pathogenesis of other chronic lung diseases like \xce\x94F508-cystic fibrosis (CF), \xce\xb11-anti-trypsin-deficiency (\xce\xb1-1 ATD) and pulmonary fibrosis (PF) is regulated by other proteostatic mechanisms, involving the degradation of misfolded proteins (\xce\x94F508-CFTR/\xce\xb11-AT- Z variant) or regulating the concentration of signaling proteins (such as TGF-\xce\xb21) by the…	2012
adrenoceptor alpha 1D(ADRA1D)	23161303_9	Histological activity index and fibrosis grade in the liver were not related to the serum alpha-1 antitrypsin level (p: 0.276 and 0.902, respectively).	2012
adrenoceptor alpha 1D(ADRA1D)	22325288_4	The homotrimeric isoform of type I collagen, which consists of three \xce\xb1-1 chains, is only found in fetal tissues, fibrosis, and cancer in humans.	2012
adrenoceptor alpha 1D(ADRA1D)	22684844_6	The extent of fibrosis was attenuated in B lymphocyte-deficient gp130(757F);\xc2\xb5MT(-/-) compound mutant mice, but fibrosis still occurred in their Smad3(-/-) counterparts consistent with the capacity of excessive Stat3 activity to induce collagen 1\xce\xb11 gene transcription independently of canonical TGF-\xce\xb2/Smad3 signalling.	2012
adrenoceptor alpha 1D(ADRA1D)	22283686_9	The number of BM-derived myofibroblasts, degree of collagen deposition and pro-collagen I mRNA expression were higher in the mice that received Col 1\xce\xb11(r/r) BM, (cells that produce mutated, collagenase-resistant collagen) compared to WT BM, indicating that the genotype of BM cells can alter the degree of pancreatic fibrosis.	2012
adrenoceptor alpha 1D(ADRA1D)	22686209_2	Alpha1-antitrypsin (AT) deficiency is the most common genetic cause of liver disease in children and is also a cause of chronic hepatic fibrosis, cirrhosis, and hepatocellular carcinoma in adults.	2012
adrenoceptor alpha 1D(ADRA1D)	22706148_8	Furthermore, GZT-treatment remarkably decreased the levels of serum GOT (glutamate oxaloacetate transaminase) and GPT (glutamic pyruvic transaminase), and the mRNA expression levels of collagen alpha-1(I) and alpha-smooth muscle actin (alpha-SMA) in DMN-induced hepatic fibrosis.	2012
adrenoceptor alpha 1D(ADRA1D)	22739374_6	When compared with the NP diet, the HF and HFHC-OO diets induced hepatosteatosis and hepatic damage [elevated plasma alanine aminotransferase (ALT) and aspartate aminotransferases] and elevated hepatic expression of markers of inflammation (monocyte chemoattractant protein-1), fibrosis (procollagen 1\xce\xb11), and oxidative stress (heme oxygenase-1) (P \xe2\x89\xa4 0.05).	2012
adrenoceptor alpha 1D(ADRA1D)	22413959_6	METHODS: Using an ethanol-liquid-diet-fed rat model of alcohol fatty liver disease (AFLD), we studied the effects of carvedilol, which can block the SNS completely via \xce\xb21, \xce\xb22, and \xce\xb11 adrenergic receptors, on the sympathetic tone, hepatosteatosis, and fibrosis based on histological, immunohistochemical, Western blot, and reverse transcriptase polymerase chain reaction analyses.	2012
adrenoceptor alpha 1D(ADRA1D)	22986349_8	Delaying the commencement of tranilast treatment to seven days post-MI attenuated myocardial fibrosis, gene expression of \xce\xb11(I) procollagen, \xce\xb11(III) procollagen, fibronectin, TGF\xce\xb21 and CTGF mRNA transcripts, and monocyte/macrophage infiltration at 28d compared to vehicle-treatment, without detriment to infarct healing.	2012
adrenoceptor alpha 1D(ADRA1D)	22880035_17	The procollagen \xce\xb11(I)-GFP transgenic provides a useful model to study activation of a gene encoding a major extracellular matrix protein during acute or chronic experimental intestinal inflammation and fibrosis.	2012
adrenoceptor alpha 1D(ADRA1D)	23131937_7	This review outlines the principal components of the autophagic process and discusses the importance of autophagy and autophagic proteins in pulmonary diseases from COPD, \xce\xb11-antitrypsin deficiency, pulmonary hypertension, acute lung injury, and cystic fibrosis to respiratory infection and sepsis.	2012
adrenoceptor alpha 1D(ADRA1D)	22261359_9	Furthermore, the expressions of fibrosis-related genes like TNF-\xce\xb1, TGF-\xce\xb21, Col1\xce\xb11 and TIMP-1 were dramatically elevated in Per2(-/-) cholestatic liver.	2012
adrenoceptor alpha 1D(ADRA1D)	23197195_6	Stellate cell activation and development of fibrosis was associated with upregulation of transforming growth factor beta 1 (tgfb1), tgfb receptor 2, mothers against decapentaplegic homolog 3 (smad3a), smad3b, beta-catenin (ctnnb1), myc, matrix metalloproteinase (mmp2), mmp14a, mmp14b, tissue inhibitors of metalloproteinase (timp) 2a, timp2b, timp3, collagen type I alpha 1a (col1a1a), and col1a1b …	2012
adrenoceptor alpha 1D(ADRA1D)	22726462_1	Resistin-like molecule \xce\xb11 (Fizz1) recruits lung dendritic cells without causing pulmonary fibrosis.	2012
adrenoceptor alpha 1D(ADRA1D)	22414566_5	In this paper we will review the current sources of clinical data for rare lung diseases and the regulatory challenges encountered by their treatment, with particular reference to alpha(1)-antitrypsin deficiency, lymphangioleiomyomatosis, cystic fibrosis, and pulmonary alveolar proteinosis.	2012
adrenoceptor alpha 1D(ADRA1D)	22297492_8	Among those, the miR-29b, downregulated in TGF\xce\xb21-treated HTFs, targeted a cadre of mRNAs that encode proteins involved in fibrosis, including PI3Kp85\xce\xb1, Sp1, and collagen type I alpha1 (Col1A1).	2012
adrenoceptor alpha 1D(ADRA1D)	22905138_12	The results showed that CXCL9 and CXCL10, but not CXCL11 or CXCL4, significantly inhibited the gene expressions of Col1\xce\xb11, Col3\xce\xb11 and \xce\xb1-SMA, indicating the potential anti-fibrosis effect of CXCL9 and CXCL10 in schistosomiasis.	2012
adrenoceptor alpha 1D(ADRA1D)	22984591_3	In the present study, we observed that heart-specific HB-EGF transgenic (TG) mice had systolic dysfunction with decreased fractional shortening (FS%), increased end-systolic diameter (LVIDs) at 5 months of age, increased heart fibrosis, and increased mRNA expression of Col1\xce\xb11 and Col3\xce\xb11 at 1, 3, 5 and 7 months of age compared to nontransgenic (NTG) littermates.	2012
adrenoceptor alpha 1D(ADRA1D)	22407906_6	In HFC-diet-fed rats, transforming growth factor-\xce\xb21 (TGF-\xce\xb21) was elevated prior to the appearance of obvious liver fibrosis pathology at 2\xc2\xa0weeks, followed by elevations in platelet-derived growth factor-B (PDGF-B) and \xce\xb1-smooth muscle actin (\xce\xb1-SMA), corresponding to evident liver fibrosis, at 8\xc2\xa0weeks and by \xce\xb1(1) type I collagen production at 16\xc2\…	2012
adrenoceptor alpha 1D(ADRA1D)	22407906_9	While the up-regulation of TGF-\xce\xb21 prior to the appearance of any evident liver fibrosis could be an early signal for progressive liver fibrosis, elevated PDGF-B and \xce\xb1-SMA levels signified evident liver fibrosis at 8\xc2\xa0weeks, and subsequent increased \xce\xb1(1) type I collagen production and reduced triglyceride synthesis indicated extensive liver fibrosis at 16\xc2\xa0weeks in…	2012
adrenoceptor alpha 1D(ADRA1D)	23149801_5	Candidate diseases for permanent therapeutic correction are Cystic Fibrosis (CF)(4), genetic variants of surfactant deficiencies(5) and \xce\xb11-antitrypsin deficiency(6).	2012
adrenoceptor alpha 1D(ADRA1D)	21725979_6	They also significantly decreased the expression of Smd2, Smad3 and Smad4, and the synthesis of collagen, procollagen I (\xce\xb11) and III, as well as suppressing the activation of PAI-1; these events consequently facilitated the resolution of fibrosis.	2011
adrenoceptor alpha 1D(ADRA1D)	21421920_1	Hepatic fibrosis and carcinogenesis in \xce\xb11-antitrypsin deficiency: a prototype for chronic tissue damage in gain-of-function disorders.	2011
adrenoceptor alpha 1D(ADRA1D)	22140659_5	Viral hepatitis, autoimmune and metabolic liver diseases (Wilson's disease, alpha-1-antitrypsin deficiency, cystic fibrosis) were excluded.	2011
adrenoceptor alpha 1D(ADRA1D)	21494310_11	Both cystic fibrosis and alpha-1-antitrypsin deficiency are possible differential diagnoses that can explain his symptoms.	2011
adrenoceptor alpha 1D(ADRA1D)	22109792_6	The most costly disorders were cystic kidney disease, \xce\xb1-1 anti-trypsin deficiency, hemochromatosis, von Willebrand disease, and cystic fibrosis.	2011
adrenoceptor alpha 1D(ADRA1D)	21528392_5	RESULTS: Although few studies have examined the relationship of molecular and cellular changes of the diaphragm to the pathogenesis of hiatal hernias, there appear to be three dominant pathogenic theories: (1) increased intraabdominal pressure forces the gastroesophageal junction (GEJ) into the thorax; (2) esophageal shortening due to fibrosis or excessive vagal nerve stimulation displaces the GE…	2011
adrenoceptor alpha 1D(ADRA1D)	21199683_4	We investigated these pathways in mammalian cells by assessing the requirements of the mammalian ERAD E3s, gp78 and Hrd1, in degradation of four substrates each with different type of structural lesions: CD3\xce\xb4, Z-variant \xce\xb11-antitrypsin, tyrosinase (C89R) and mutant cystic fibrosis transmembrane conductance regulator (CFTR\xce\x94F508).	2011
adrenoceptor alpha 1D(ADRA1D)	21660246_4	Similar to COPD, Z alpha-1 antitrypsin deficiency (Z-A1ATD) and cystic fibrosis (CF) are associated with impaired pulmonary antiprotease defences leading to unopposed protease activity.	2011
adrenoceptor alpha 1D(ADRA1D)	21629648_8	The fibrosis-related parameters assessed were areas of collagen deposition, content of hydroxyproline and mRNA expressions of Col1\xce\xb11, Col3\xce\xb11, \xce\xb1-SMA, TGF-\xce\xb2, MMP9, TIMP1, IL-4, IL-10, IL-13 and IFN-\xce\xb3 of liver.	2011
adrenoceptor alpha 1D(ADRA1D)	21695173_9	rhACE2 had no significant effect on fibrosis as measured by trichrome staining and collagen1\xce\xb11 expression.	2011
adrenoceptor alpha 1D(ADRA1D)	21335177_4	RESULTS: Indications were biliary atresia (BA; n = 81), primary sclerosing cholangitis (n = 5), \xce\xb1-1 antitrypsin deficiency (n = 4); cholestasis (n = 9), fulminant hepatic failure (n = 8), autoimmune hepatitis (n = 2), Alagille syndrome (n = 4), hepatoblastoma (n = 3), tyrosinemia (n = 2), and congenital hepatic fibrosis (n = 3).	2011
adrenoceptor alpha 1D(ADRA1D)	21683248_2	In the classical form of alpha-1-antitrypsin (AT) deficiency, a mutant protein accumulates in the endoplasmic reticulum of liver cells, causing hepatic fibrosis and hepatocellular carcinoma by a gain-of-toxic function mechanism.	2011
adrenoceptor alpha 1D(ADRA1D)	21926544_6	Immunohistochemical analysis of \xce\xb1-smooth muscle actin and real-time reverse transcription polymerase chain reaction for transforming growth factor-\xce\xb21 (TGF-\xce\xb21) and collagen-\xce\xb11(I) were performed to evaluate the activation of pancreatic stellate cells and the mRNA levels of fibrosis-related genes, respectively.	2011
adrenoceptor alpha 1D(ADRA1D)	21926544_7	RESULTS: Both \xce\xb1-tocopherol and TRF reduced oxidative stress, ameliorated inflammation and fibrosis, and down-regulated the mRNA expression of TGF-\xce\xb21 and collagen-\xce\xb11(I) in DBTC-induced CP.	2011
adrenoceptor alpha 1D(ADRA1D)	21545815_10	Furthermore, both drugs significantly reduced L-Ca(2+) channel related subunits (\xce\xb11C or \xce\xb11D) and interstitial fibrosis (17.1\xc2\xb12.2% vs. 12.3\xc2\xb11.8, 11.7\xc2\xb11.2%, P<0.01, for thyroxine group, benazepril group and irbesartan group, respectively), increased lateral/polar connection of Cx43 (1.04\xc2\xb10.16 vs. 1.33\xc2\xb10.29,1.28\xc2\xb10.25, P<0.01, for thyroxine grou…	2011
adrenoceptor alpha 1D(ADRA1D)	22149461_8	The anti-fibrotic action of ascorbic acid in the rapid regression of alcoholic liver fibrosis may be attributed to decrease in the oxidative stress, hepatic stellate cells activation, cytotoxicity and mRNA expression of fibrotic genes CYP2E1, TGF-\xce\xb2(1), TNF-\xce\xb1 and \xce\xb1(1) (I) collagen in hepatic tissues.	2011
adrenoceptor alpha 1D(ADRA1D)	22038282_2	Endoplasmic reticulum (ER) stress is increasingly recognized as an important mechanism in a wide range of diseases including cystic fibrosis, alpha-1 antitrypsin deficiency, Parkinson's and Alzheimer's disease.	2011
adrenoceptor alpha 1D(ADRA1D)	22192476_1	HIF-1\xce\xb1 signaling by airway epithelial cell K-\xce\xb11-tubulin: role in fibrosis and chronic rejection of human lung allografts.	2011
adrenoceptor alpha 1D(ADRA1D)	22108052_13	\xce\xb11 and \xce\xb13-nAChR mRNA expression was significantly upregulated in NASH fibrosis compared to normal livers.	2011
adrenoceptor alpha 1D(ADRA1D)	21333722_7	For evaluation of hepatic fibrosis-related factors, collagen \xce\xb11-I, tissue inhibitor of metalloproteinase-1 (TIMP-1), and \xce\xb1-smooth muscle actin (\xce\xb1-SMA) mRNA and protein levels were analyzed.	2011
adrenoceptor alpha 1D(ADRA1D)	21382168_4	RESULTS: Although the expression levels of the tissue inhibitor of metalloproteinases-1 and \xce\xb11(I) collagen mRNA were unchanged, feeding the TGF-\xce\xb1 transgenic mice the MCD diet resulted in greater expression of the murine functional analogue of matrix metalloproteinase-1 (MMP-1), MMP-13 mRNA and protein and attenuated hepatic fibrosis compared with wild-type mice.	2011
adrenoceptor alpha 1D(ADRA1D)	21653527_2	The University of Vermont College of Medicine and the Vermont Lung Center, with support of the National Heart, Lung, and Blood Institute (NHLBI), the Alpha-1 Foundation, the American Thoracic Society, the Emory Center for Respiratory Health,the Lymphangioleiomyomatosis (LAM) Treatment Alliance,and the Pulmonary Fibrosis Foundation, convened a workshop,\xe2\x80\x98\xe2\x80\x98Stem Cells and Cell T…	2011
adrenoceptor alpha 1D(ADRA1D)	21617532_1	Performance of enhanced liver fibrosis plasma markers in asymptomatic individuals with ZZ \xce\xb11-antitrypsin deficiency.	2011
adrenoceptor alpha 1D(ADRA1D)	22034040_4	In some trials, sustained or transient transgene expression has been demonstrated in humans treated for alpha-1 antitrypsin deficiency, LPL deficiency, hemophilia B and cystic fibrosis, and sustained correction of inherited blindness has been reported by three groups.	2011
adrenoceptor alpha 1D(ADRA1D)	22159281_13	Galectin-3(-/-) mice displayed significantly decreased fibrosis, with reduced expression of \xce\xb1-smooth muscle actin and procollagen \xce\xb11(I) following BDL.	2011
adrenoceptor alpha 1D(ADRA1D)	21303908_1	Interleukin-13 (IL-13)/IL-13 receptor alpha1 (IL-13Ralpha1) signaling regulates intestinal epithelial cystic fibrosis transmembrane conductance regulator channel-dependent Cl- secretion.	2011
adrenoceptor alpha 1D(ADRA1D)	21645500_4	METHOD: We evaluated an automated triplex lectin-antibody sandwich immunoassay assisted by an automated protein purification system (ED-01) and a bedside clinical chemistry analyzer (HISCL) for the acquisition of two glyco-parameters (AOL/DSA and MAL/DSA) derived from a fibrosis-related glyco-alteration of serum alpha1-acid glycoprotein (AGP).	2011
adrenoceptor alpha 1D(ADRA1D)	20585829_10	In BDL liver injury, a daily dose of 10 mg/kg per day of GW570 inhibited collagen I \xce\xb11 mRNA, while concentrations of 1 also inhibited fibrosis as measured by hydroxyproline and total collagen content.	2010
adrenoceptor alpha 1D(ADRA1D)	20952666_6	In \xce\xb11(S/S)\xce\xb12(R/R) mice, pressure overload by transverse aortic coarctation induced severe left ventricular (LV) hypertrophy with extensive perivascular and replacement fibrosis at only 4 wk.	2010
adrenoceptor alpha 1D(ADRA1D)	20206174_8	RESULTS: Thrombocytopenic mice developed exacerbated liver fibrosis, with increased expression of type I collagen alpha1 and alpha2, during cholestasis.	2010
adrenoceptor alpha 1D(ADRA1D)	20679547_6	Ang II-mediated myocardial fibrosis and expression of procollagen type I alpha 1, procollagen type III alpha 1, transforming growth factor-beta1, and fibronectin were also suppressed by rhACE2.	2010
adrenoceptor alpha 1D(ADRA1D)	20816672_1	Triplex forming oligonucleotides against type \xce\xb11(I) collagen attenuates liver fibrosis induced by bile duct ligation.	2010
adrenoceptor alpha 1D(ADRA1D)	20373910_2	BACKGROUND: Inhaled alpha1-antitrypsin (AAT) is being developed for treatment of cystic fibrosis to protect the lungs from excessive free elastase.	2010
adrenoceptor alpha 1D(ADRA1D)	20816672_4	We have therefore used a triplex forming oligonucleotide (TFO) against the type \xce\xb11(I) collagen and evaluated, whether it can attenuate liver fibrosis induced by common bile duct ligation (CBDL) in rats.	2010
adrenoceptor alpha 1D(ADRA1D)	20522742_3	In addition to decreased serum concentrations of AT, the disorder is characterized by accumulation of the mutant alpha1-antitrypsin Z (ATZ) variant inside cells, causing hepatic fibrosis and/or carcinogenesis by a gain-of-toxic function mechanism.	2010
adrenoceptor alpha 1D(ADRA1D)	20522742_1	An autophagy-enhancing drug promotes degradation of mutant alpha1-antitrypsin Z and reduces hepatic fibrosis.	2010
adrenoceptor alpha 1D(ADRA1D)	21134900_3	METHODS AND RESULTS: We used a direct atrial myocyte-fibroblast contact co-culture and a fibroblast-specific transforming growth factor \xce\xb21 (TGF-\xce\xb21), connective tissue growth factor (CTGF) and procollagen type I \xce\xb1-1 (COL1A1) luciferase reporter system to investigate the possible molecular mechanism of rapid-depolarization-induced atrial fibrosis.	2010
adrenoceptor alpha 1D(ADRA1D)	21098019_7	Fibrosis-related transcripts including procollagen \xce\xb11(I) (CoL1A), TIMP1, and MMP3 mRNA were measured by qPCR.	2010
adrenoceptor alpha 1D(ADRA1D)	20298391_3	OBJECTIVE: To identify new markers of asthma and COPD to implement in clinical practice, we genotyped for common genetic variants in the cystic fibrosis transmembrane conductance regulator (CFTR), alpha(1)-antitrypsin, and mannose-binding lectin (MBL) genes, and measured baseline fibrinogen and C-reactive protein (CRP) concentrations in up to 9245 adults randomly selected from the Danish general …	2010
adrenoceptor alpha 1D(ADRA1D)	20585829_8	Fibrosis biomarkers including total collagen, hydroxyproline, collagen I \xce\xb11 and smooth muscle \xce\xb1 actin were measured.	2010
adrenoceptor alpha 1D(ADRA1D)	21142972_9	Currently, rAAV vectors are being utilized in phase I/II clinical trials for cystic fibrosis, \xce\xb1-1 antitrypsin deficiency, Canavan's disease, Parkinson's disease, hemophilia, limb-girdle muscular dystrophy, arthritis, Batten's disease, and Leber's congenital amaurosis (Flotte et al., 1996 , 2004 ; Kay et al., 2000 ; Aitken et al., 2001 ; Wagner et al., 2002 ; Manno et al., 2003 ; Snyder and…	2010
adrenoceptor alpha 1D(ADRA1D)	21147646_4	In contrast, patients with cystic fibrosis (CF) are characterised by a normal synthesis of \xce\xb11-PI and a severe pulmonary inflammation with a strong excess of NE in the lung followed by progressive loss of lung function.	2010
adrenoceptor alpha 1D(ADRA1D)	21147646_1	Lung deposition of inhaled alpha-1-proteinase inhibitor (alpha 1-PI) - problems and experience of alpha1-PI inhalation therapy in patients with hereditary alpha1-PI deficiency and cystic fibrosis.	2010
adrenoceptor alpha 1D(ADRA1D)	20952666_9	In separate experiments, chronic Digibind treatment prevented the rapid progression of cardiac hypertrophy and fibrosis in \xce\xb11(S/S)\xce\xb12(R/R) mice.	2010
adrenoceptor alpha 1D(ADRA1D)	20089260_8	TLR4's influence on fibroblast accumulation and renal fibrosis occurred independent of any alterations in TNF-\xce\xb1, TGF-\xce\xb21, or pSMAD2 expression, but did involve alterations integrin \xce\xb11 expression.	2010
adrenoceptor alpha 1D(ADRA1D)	20864678_1	Collagen XIII induced in vascular endothelium mediates alpha1beta1 integrin-dependent transmigration of monocytes in renal fibrosis.	2010
adrenoceptor alpha 1D(ADRA1D)	20819328_3	The differential diagnosis for unresponsive disease includes poorly controlled asthma, noncompliance with medical regimen, vocal cord dysfunction, rhinosinusitis, gastroesophageal reflux disease or recurrent aspiration, foreign body aspiration, allergic bronchopulmonary aspergillosis, Churg-Strauss vasculitis, cardiac disorders such as congestive heart failure or mitral stenosis, or other pulmona…	2010
adrenoceptor alpha 1D(ADRA1D)	21047982_2	BACKGROUND: Despite the progress made in understanding glyco-alterations of specific glycoproteins such as \xce\xb11-acid glycoprotein (AGP) associated with liver fibrosis, there has been no useful diagnostic assay with a lectin recognizing the fibrosis-specific alteration and an antibody against the core protein.	2010
adrenoceptor alpha 1D(ADRA1D)	21170686_6	Ang II increased expression of genes related to heart function (ANF, \xce\xb2-MCH, Ankrd-1, PKC-\xce\xb1, PKC-\xce\xb4 TNF-\xce\xb1); fibrosis (Col I-\xce\xb11, Col III-\xce\xb11, Fn-1, Timp1) and apoptosis (P53, Casp-3) without changing heart weight but with 68% increase in collagen content.	2010
adrenoceptor alpha 1D(ADRA1D)	21111991_5	This review focuses on hepatobiliary complications of respiratory failure, cystic fibrosis, \xce\xb1-1 antitrypsin deficiency, sarcoidosis, and tuberculosis.	2010
adrenoceptor alpha 1D(ADRA1D)	20424598_6	The therapeutic efficiency of our approach was demonstrated by a remarkable attenuation of tubulointerstitial fibrosis and repression of fibrotic markers such as collagen1alpha1 (Col1A1), platelet-derived growth factor receptor-beta (PDGFR-beta), and alpha-smooth muscle actin (SMA).	2010
adrenoceptor alpha 1D(ADRA1D)	20348404_9	RESULTS: We found that branching alpha-1,3-fucosylated multiantennary glycans on hemopexin were increased in the HCC group compared with the cirrhosis without HCC, fibrosis, and healthy volunteer groups, whereas nonmodified biantennary glycans decreased progressively across groups from fibrosis to the cirrhosis and HCC groups.	2010
adrenoceptor alpha 1D(ADRA1D)	20940300_10	This could explain the protective function of integrin \xce\xb11\xce\xb21 in oxidative stress-mediated damage and why integrin \xce\xb11-null mice are more susceptible to fibrosis following injury.	2010
adrenoceptor alpha 1D(ADRA1D)	20715179_6	As a proof of principle, here we apply this strategy to generate >100 lung disease-specific iPSC lines from individuals with a variety of diseases affecting the epithelial, endothelial, or interstitial compartments of the lung, including cystic fibrosis, \xce\xb1-1 antitrypsin deficiency-related emphysema, scleroderma, and sickle-cell disease.	2010
adrenoceptor alpha 1D(ADRA1D)	20442198_10	The immunomodulatory effects of AM3 led to reduced hepatic fibrogenesis in cirrhotic rats, as shown by decreased area of liver fibrosis, hydroxyproline content and mRNA expression of procollagen alpha1(I).	2010
adrenoceptor alpha 1D(ADRA1D)	20501968_8	Furthermore, hepatic fibrosis was significantly reduced in the valine group, and the mRNA levels of factors associated with liver fibrosis such as procollagen alpha1(III), transforming growth factor-beta1 and connective tissue growth factor were significantly lower in the liver of the valine group 10 days after the last administration.	2010
adrenoceptor alpha 1D(ADRA1D)	20739079_3	The aim of this study was to assess whether a panel of genetic variants previously reported to influence iron metabolism, including the C282Y/H63D HFE, the PiZ/PiS alpha1-antitrypsin, the IVS1-24 ferroportin polymorphisms, and the beta-thalassemia trait, may be able to predict the presence of parenchymal siderosis and of progressive fibrosis in NAFLD.	2010
adrenoceptor alpha 1D(ADRA1D)	20089260_5	The kidneys were harvested and tissues were analyzed for TLR4 expression (Western blot; RTPCR), E-cadherin and alpha smooth muscle actin (\xce\xb1-SMA) expression (Western blot), fibroblast accumulation (fibroblast specific protein (FSP-1+) staining), renal fibrosis (collagen I RTPCR, total collagen assay, Masson's trichrome staining), cytokine gene expression (tumor necrosis factor-alpha (TNF-\x…	2010
adrenoceptor alpha 1D(ADRA1D)	19641533_2	Pulmonary gene therapy may ultimately cure diseases such as cystic fibrosis, alpha1-antitrypsin deficiency, lung cancer and pulmonary hypertension.	2009
adrenoceptor alpha 1D(ADRA1D)	19436688_7	This review explores potential markers of early disease and prognosis in COPD by examining genetic markers in the alpha(1)-antitrypsin, cystic fibrosis transmembrane conductance regulator (CFTR), and MBL-2 genes, and by examining the biochemical markers fibrinogen and C-reactive protein (CRP), which correlate with degree of pulmonary inflammation during stable conditions of COPD.	2009
adrenoceptor alpha 1D(ADRA1D)	19226329_9	Late fibrosis was characterized by an increase in Mac-2-binding protein, alpha-2-macroglobulin and alpha-1B-glycoprotein expression and a decrease in haptoglobin expression.	2009
adrenoceptor alpha 1D(ADRA1D)	19578790_5	Vitamin E repleted GSH, reduced TBARS, steatosis, inflammation, HSC activation and collagen alpha1(I) mRNA expression, and ameliorated fibrosis.	2009
adrenoceptor alpha 1D(ADRA1D)	19578790_4	Hepatic stellate cell (HSC) activation and increased collagen alpha1(I) mRNA expression, together with morphologic fibrosis were evident from week 5.	2009
adrenoceptor alpha 1D(ADRA1D)	19578790_7	Despite repletion of hepatic GSH in OTC-supplemented mice, the initial benefit in the reduction of hepatic TBARS and inhibition of collagen alpha1(I) mRNA expression at week 5, failed to protect these mice from hepatic injury or fibrosis at later time points.	2009
adrenoceptor alpha 1D(ADRA1D)	20008268_8	Diastolic dysfunction was accompanied by molecular [significant increases in procollagen-alpha(1)(I) gene expression on real-time PCR] and morphological (increases in total collagen, P < 0.05, and collagen type-I protein deposition, P < 0.001) evidence of left ventricular (LV) fibrosis following high-dose U-II infusion.	2009
adrenoceptor alpha 1D(ADRA1D)	19841286_2	We reported previously that targeted expression of rat prorenin to the liver under the control of the human alpha1-antitrypsin promoter increased plasma prorenin levels by several-hundred-fold in male transgenic rats and caused cardiac hypertrophy, severe renal lesions, and myocardial fibrosis by 20 weeks of age, despite normal blood pressure.	2009
adrenoceptor alpha 1D(ADRA1D)	19463821_4	Twice-a-week intraperitoneal injections of CCl(4) for 8 weeks resulted in massive liver fibrosis, augmented transforming growth factor (TGF)-beta(1) and type I procollagen alpha(1) chain (Col1a1) mRNA expression, and the hepatic stellate cell (HSC) activation in WT mice, all of which were significantly suppressed in Tg mice.	2009
adrenoceptor alpha 1D(ADRA1D)	19596472_5	RESULTS: Long-term combination therapy with EZ and AC significantly reduced steatosis, inflammation and fibrosis in the liver, compared with long-term monotherapy with either drug, in an HFD-induced NAFLD mouse model; the combination therapy also significantly increased the expression of microsomal triglyceride transfer protein (MTP) and peroxisome proliferators-activated receptor-alpha1 (PPAR-al…	2009
adrenoceptor alpha 1D(ADRA1D)	19251783_1	Lung deposition of inhaled alpha1-proteinase inhibitor in cystic fibrosis and alpha1-antitrypsin deficiency.	2009
adrenoceptor alpha 1D(ADRA1D)	19251783_2	Individuals with alpha(1)-antitrypsin (AAT) deficiency and cystic fibrosis (CF) have a protease-antiprotease imbalance in their lungs, which leads to early onset progressive lung disease.	2009
adrenoceptor alpha 1D(ADRA1D)	22096473_5	Known aetiologies for diffuse bronchiectasis (cystic fibrosis, anti-\xce\xb11 antitrypsin deficiency, rheumatic diseases, mycobacterial infections, childhood infections and immune deficiencies) were ruled out.	2009
adrenoceptor alpha 1D(ADRA1D)	19690163_1	A novel signaling pathway: fibroblast nicotinic receptor alpha1 binds urokinase and promotes renal fibrosis.	2009
adrenoceptor alpha 1D(ADRA1D)	19189315_10	In vivo, Ad-TbetaRIIDeltacyt reduced liver fibrosis, increased nuclear SnoN in sinusoidal cells, and also produced significant suppression in collagen alpha1 (I), TGF-beta1, PAI-1, MMP-2 and over-expression in MMP-3 in thioacetamide-intoxicated animals.	2009
adrenoceptor alpha 1D(ADRA1D)	19490416_7	Surprisingly, however, induction of collagen I alpha1 mRNA and accumulation of Sirius red-stained fibrils and hepatic hydroxyproline were similar in BL6 and 129/SVJ mice, and although patchy sinusoidal fibrosis emerged in both strains, neither developed bridging fibrosis.	2009
adrenoceptor alpha 1D(ADRA1D)	19998499_8	RAGE stimulation with AGE-BSA and CML-BSA did not alter HSC proliferation, apoptosis, fibrogenic signal transduction and fibrosis- or fibrolysis-related gene expression, except for marginal upregulation of procollagen alpha1(I) mRNA by AGE-BSA.	2009
adrenoceptor alpha 1D(ADRA1D)	19954725_12	Although proteinuria and interstitial fibrosis have not been associated with this effect, the present study does not exclude some of these disorders in the pathophysiology of urinary excretion of alpha1-microg.	2009
adrenoceptor alpha 1D(ADRA1D)	20023268_7	The remaining findings included the following: steatosis/steatohepatitis, 251; hemosiderosis, 62; granulomatous disease, 7; drug-induced hepatitis, 4; primary biliary cirrhosis, 3; Wilson disease, 2; metastases, 2; and cholangiocarcinoma, atypical lymphoid proliferation, alpha(1)-antitrypsin deficiency, cystic fibrosis, and schistosomiasis, 1 each.	2009
adrenoceptor alpha 1D(ADRA1D)	19117745_3	METHODS: In 16 sarcoidosis, 7 idiopathic pulmonary fibrosis (IPF) and 8 hypersensitivity pneumonitis (HP) patients we evaluated IL-1 alpha, -1R, -1RA, -2, -4, -4R alpha, -6, -10, -12, IFN-gamma, TGF-beta1 and TNF-alpha gene polymorphisms in peripheral blood, and MCP-1,MIP-1 alpha, MIP-1 beta, RANTES, ENA-78, FGF, G-CSF, GM-CSF, IFN-gamma, IL-1 alpha, IL-1RA, IL-1 beta, -2, -4, -5, -6, -8, -10, -1…	2009
adrenoceptor alpha 1D(ADRA1D)	18846348_7	From control to weak, moderate and severe fibrosis stages, alpha1 (I), alpha1 (III) and alpha1 (V) showed a gradually increased trend in skin lesions (P<0.05).	2008
adrenoceptor alpha 1D(ADRA1D)	18846348_3	The contents and distribution for alpha1 chain of collagen type I, III and V [alpha1 (I), alpha1 (III) and alpha1 (V)] in skin lesions of 36 patients with SSc (9 cases of mild fibrosis, 14 moderate, and 13 severe) were detected by using immunohistochemical SP method.	2008
adrenoceptor alpha 1D(ADRA1D)	18798739_11	We predict that selective interference of VCP interaction(s) with aberrant protein or its ERAD function will be an effective therapeutic site to rescue functional misfolded protein in diseases like cystic fibrosis and alpha-1-trypsin deficiency.	2008
adrenoceptor alpha 1D(ADRA1D)	18187064_5	In the liver, alpha-1 antitrypsin deficiency may manifest as benign neonatal hepatitis syndrome; a small percentage of adults develop liver fibrosis, with progression to cirrhosis and hepatocellular carcinoma.	2008
adrenoceptor alpha 1D(ADRA1D)	18501344_10	Olmesartan also inhibited hepatic fibrosis, stellate cell activation, and expression of fibrogenic genes (transforming growth factor-beta, alpha 1 [I] procollagen, plasminogen activator inhibitor-1) in both OLETF and LETO rats.	2008
adrenoceptor alpha 1D(ADRA1D)	18824370_11	Indications were 7 emphysema, 3 Alpha-1-antitrypsin deficiency, 12 cystic fibrosis (p=0.007), 4 pulmonary fibrosis, and 1 bronchiectasis.	2008
adrenoceptor alpha 1D(ADRA1D)	19812735_2	Protein misfolding and aggregation cause a large number of neurodegenerative diseases in humans due to (i) gain of function as observed in Alzheimer's disease, Huntington's disease, Parkinson's disease, and Prion's disease or (ii) loss of function as observed in cystic fibrosis and alpha1-antitrypsin deficiency.	2008
adrenoceptor alpha 1D(ADRA1D)	18581212_6	More detailed case studies are presented for three proteins, two of which are of therapeutic interest: anti-CD4 antibody (rheumatoid arthritis), alpha1-antitrypsin (cystic fibrosis and emphysema), and trypsinogen (a model enzyme).	2008
adrenoceptor alpha 1D(ADRA1D)	18752001_2	Previous in vitro studies suggested that Cl(-) currents produced by the cystic fibrosis transmembrane conductance regulator (CFTR; ABCC7) are inhibited by the alpha1 isoform of the adenosine monophosphate (AMP)-stimulated kinase (AMPK).	2008
adrenoceptor alpha 1D(ADRA1D)	18386623_2	Alpha-1-antitrypsin deficiency (AAT) is one of the three most common lethal genetic diseases in the caucasian population (together with cystic fibrosis and Down syndrome).	2008
adrenoceptor alpha 1D(ADRA1D)	18846348_12	The changes of alpha1 (V) contents in reticular layer occurred earlier than those in papillary layer, and it suggested that the fibrosis in reticular layer appeared earlier.	2008
adrenoceptor alpha 1D(ADRA1D)	18408455_3	Some inherited liver diseases are now characterized by protein-folding mutations, including Gaucher disease, cystic fibrosis and ZZ alpha1-antitrypsin deficiency.	2008
adrenoceptor alpha 1D(ADRA1D)	18290877_5	Although subjecting alpha(1B)-KO mice to transverse aortic constriction (TAC) did not reveal significant phenotype differences compared with controls, mice deficient in both alpha(1A)- and alpha(1B)-AR responded to TAC with poor survival, increased cardiomyocyte apoptosis, more severe fibrosis and dysfunction, but a similar degree of LV hypertrophy, compared with wild-type littermates.	2008
adrenoceptor alpha 1D(ADRA1D)	18290877_6	Following TAC, alpha(1B)-TG mice developed more severe hypertrophy, interstitial fibrosis and LV dysfunction.	2008
[truncated: 96,343 more rows]
